# Supplementary material
Source: HighWire-hosted journal article supplement (https://jitc.bmj.com/content/10/10/e004973)
Supplement: inline-supplementary-material-3 [file inline-supplementary-material-3.xlsx]

## Sheet: All B16F10 Kb Peptides
Supplementary Table 2. List of all 7-14 aa non-redundant peptides identified at 1% FDR, following immunoaffinity purification of H2-Kb peptide complexes from B16-F10 tumors. Source, peptide sequence, length, accession and the number of times each peptide was detected in the experiments are shown.
Source	Peptide	Length	Accession	Experiment 1	Experiment 2	Total
B16-F10	AAAKVALTKRAD	12	Q9QXX4|CMC2_MOUSE		1	1
B16-F10	AALAAAEPA	9	Q8C0K5|GDC_MOUSE	1		1
B16-F10	AALDFKNV	8	Q8CG47|SMC4_MOUSE		1	1
B16-F10	AALIYTSV	8	Q6PDL0|DC1L2_MOUSE:Q8R1Q8|DC1L1_MOUSE		1	1
B16-F10	AAYAYSAL	8	Q9CQ22|LTOR1_MOUSE		1	1
B16-F10	AAYEFTTL	8	P32233|DRG1_MOUSE	1	1	2
B16-F10	AAYIFGLGL	9	Q9D8V0|HM13_MOUSE:Q9D8V0-3|HM13_MOUSE:Q9D8V0-4|HM13_MOUSE		1	1
B16-F10	AAYSFYNV	8	O70310|NMT1_MOUSE		1	1
B16-F10	ACPEYSRL	8	B9EKI3|TMF1_MOUSE	1		1
B16-F10	ADVDAADNRKIT	12	Q99NH0|ANR17_MOUSE	1		1
B16-F10	AFYYIHNL	8	Q9QYC0|ADDA_MOUSE	1		1
B16-F10	AGFAFLTGV	9	Q9D2C7|BI1_MOUSE		1	1
B16-F10	AGKMFVGGLSWD	12	Q99020|ROAA_MOUSE	1		1
B16-F10	AGPTFNYL	8	Q01320|TOP2A_MOUSE		1	1
B16-F10	AGRKLALKTID	11	Q9DCX2|ATP5H_MOUSE	1		1
B16-F10	AGYMYTQL	8	A2AN08|UBR4_MOUSE	1	1	2
B16-F10	AHYTYNNL	8	Q8BZ00|SL9A9_MOUSE		1	1
B16-F10	AICIFREL	8	Q08943|SSRP1_MOUSE	1		1
B16-F10	AIFNFQSL	8	Q9CR64-2|KISHA_MOUSE:Q9CR64|KISHA_MOUSE		1	1
B16-F10	AIIKFPLTTESAM	13	P62751|RL23A_MOUSE	1	1	2
B16-F10	AIITGFRNV	9	Q9Z1S0|BUB1B_MOUSE		1	1
B16-F10	AILSFTSL	8	Q9WUF3|C8AP2_MOUSE		1	1
B16-F10	AIPEFMNL	8	Q9QXK3-4|COPG2_MOUSE		1	1
B16-F10	AIVEFLSNL	9	Q9D0N7|CAF1B_MOUSE		1	1
B16-F10	AIVSFAHV	8	P43247|MSH2_MOUSE		1	1
B16-F10	ALDVANKIGII	11	P62751|RL23A_MOUSE	1	1	2
B16-F10	ALLQYINL	8	Q91W96|APC4_MOUSE		1	1
B16-F10	ALLSFTSL	8	Q9QZI9|SERC3_MOUSE		1	1
B16-F10	ALPFRKDLGD	10	Q9JHJ0|TMOD3_MOUSE	1		1
B16-F10	ALPKAVVKLD	10	P08508|FCGR3_MOUSE	1	1	2
B16-F10	AMYIFLHTV	9	Q9CQZ0|ORML2_MOUSE	1	1	2
B16-F10	ANFPRATGL	9	P0CG14|CTF8A_MOUSE	1		1
B16-F10	ANFSFRNTL	9	P11344|TYRO_MOUSE		1	1
B16-F10	ANLERTFIAIKPD	13	Q01768|NDKB_MOUSE	1		1
B16-F10	ANYEFSQV	8	P56528|CD38_MOUSE	1	1	2
B16-F10	AQFKFTVL	8	P50580-2|PA2G4_MOUSE:P50580|PA2G4_MOUSE		1	1
B16-F10	AQQAADKYLYVD	12	Q8VDD5|MYH9_MOUSE	1		1
B16-F10	AQYKFIYV	8	P29351|PTN6_MOUSE	1	1	2
B16-F10	ASLRFVFL	8	Q99L90|MCRS1_MOUSE		1	1
B16-F10	ASNDYTQQATQSY	13	P56959|FUS_MOUSE	1		1
B16-F10	ASNDYTQQATQSYG	14	P56959|FUS_MOUSE	1		1
B16-F10	ASNVTNKTD	9	Q9Z204|HNRPC_MOUSE	1		1
B16-F10	ASPEFTKL	8	Q3TJZ6|FA98A_MOUSE	1	1	2
B16-F10	ASPIFTHV	8	Q8C5N3-2|CWC22_MOUSE:Q8C5N3|CWC22_MOUSE		1	1
B16-F10	ASSPKFSEL	9	A2AGT5|CKAP5_MOUSE	1		1
B16-F10	ASYEFTTL	8	Q9QXB9|DRG2_MOUSE		1	1
B16-F10	ASYEFVQRL	9	Q9JHU4|DYHC1_MOUSE	1	1	2
B16-F10	ASYLFRGL	8	Q7TN60|TMC6_MOUSE	1	1	2
B16-F10	ASYLLAAL	8	P99027|RLA2_MOUSE		1	1
B16-F10	ASYTYLSL	8	P49945|FRIL2_MOUSE:P29391|FRIL1_MOUSE	1	1	2
B16-F10	ASYVYLSM	8	P09528|FRIH_MOUSE:Q9D5H4|FTMT_MOUSE		1	1
B16-F10	ATFEKESVM	9	P51912|AAAT_MOUSE		1	1
B16-F10	ATFPFAML	8	O35316|SC6A6_MOUSE		1	1
B16-F10	ATIRVTNL	8	Q9Z1D1|EIF3G_MOUSE		1	1
B16-F10	ATLAYTKL	8	Q8BUR4-2|DOCK1_MOUSE:Q8BUR4|DOCK1_MOUSE		1	1
B16-F10	ATLEFTQL	8	P29477|NOS2_MOUSE	1		1
B16-F10	ATLVFHNL	8	P42227|STAT3_MOUSE	1	1	2
B16-F10	ATQQFQQL	8	P11370|ENV2_MOUSE		1	1
B16-F10	ATQVYPKL	8	Q8K3W0|BABA2_MOUSE	1	1	2
B16-F10	ATRSFPQL	8	Q07076|ANXA7_MOUSE	1	1	2
B16-F10	ATVSYANL	8	Q62371|DDR2_MOUSE		1	1
B16-F10	ATYIFLQTF	9	Q8K1A5|TM41B_MOUSE	1	1	2
B16-F10	ATYIFNGL	8	Q9QXK3|COPG2_MOUSE	1		1
B16-F10	ATYSYKEAL	9	Q8R349|CDC16_MOUSE		1	1
B16-F10	ATYTFIQQL	9	Q9R0N0|GALK1_MOUSE	1		1
B16-F10	AVFTFEQL	8	Q3UW53|NIBAN_MOUSE		1	1
B16-F10	AVFTWTNL	8	Q3UH60-2|DIP2B_MOUSE:Q8BWT5|DIP2A_MOUSE:Q3UH60|DIP2B_MOUSE		1	1
B16-F10	AVIIFTGL	8	Q8VE96|S35F6_MOUSE		1	1
B16-F10	AVIKFLEL	8	P43247|MSH2_MOUSE		1	1
B16-F10	AVLSFSTRL	9	P46978|STT3A_MOUSE		1	1
B16-F10	AVQISKKRKFVAD	13	P62908|RS3_MOUSE	1		1
B16-F10	AVVEFLTSV	9	Q5HZJ0|RNC_MOUSE		1	1
B16-F10	AVVEFSRNV	9	P70698|PYRG1_MOUSE		1	1
B16-F10	AVYAFLGL	8	Q9JJU8|SH3L1_MOUSE		1	1
B16-F10	AVYQFGSAL	9	Q80ZE4|PAQR7_MOUSE		1	1
B16-F10	AVYSFEAL	8	Q99KC8|VMA5A_MOUSE	1	1	2
B16-F10	AVYTFETL	8	Q8R1F1|NIBL1_MOUSE	1	1	2
B16-F10	AVYTFETLL	9	Q8R1F1|NIBL1_MOUSE	1	1	2
B16-F10	AWIKVEQL	8	Q922P9|GLYR1_MOUSE		1	1
B16-F10	CFKFDHL	7	P47754|CAZA2_MOUSE	1		1
B16-F10	DDDIAALVVDNGSG	14	P60710|ACTB_MOUSE	1		1
B16-F10	DPKFEVIDKPQS	12	P97450|ATP5J_MOUSE	1	1	2
B16-F10	DPPSAKAAID	10	P56959|FUS_MOUSE	1		1
B16-F10	DPPSAKAAIDWFD	13	P56959|FUS_MOUSE	1		1
B16-F10	EAYRFTGL	8	Q8K015-2|CENPO_MOUSE:Q8K015|CENPO_MOUSE		1	1
B16-F10	EDDNFGTAQSNKA	13	E9PVA8|GCN1_MOUSE	1		1
B16-F10	EESFPGFVNL	10	Q6ZWR6-4|SYNE1_MOUSE:Q6ZWR6|SYNE1_MOUSE		1	1
B16-F10	EETEHDYQNHI	11	P08101-2|FCGR2_MOUSE:P08101-3|FCGR2_MOUSE:P08101|FCGR2_MOUSE		1	1
B16-F10	EIVTFERL	8	Q61584-2|FXR1_MOUSE:Q61584-5|FXR1_MOUSE:Q61584-6|FXR1_MOUSE:Q61584-4|FXR1_MOUSE:Q61584-7|FXR1_MOUSE:Q61584-3|FXR1_MOUSE:Q61584|FXR1_MOUSE		1	1
B16-F10	EIYEFHKM	8	Q09014|NCF1_MOUSE		1	1
B16-F10	ELFPVFTQL	9	Q99KU6-2|CF089_MOUSE:Q99KU6|CF089_MOUSE		1	1
B16-F10	ELLAKEAELT	10	Q8VDD5|MYH9_MOUSE	1		1
B16-F10	ENYDRGYSNL	10	Q61656|DDX5_MOUSE		1	1
B16-F10	ENYDRGYSNLL	11	Q61656|DDX5_MOUSE		1	1
B16-F10	ERPTYTNL	8	P68368|TBA4A_MOUSE:P68373|TBA1C_MOUSE:Q9JJZ2|TBA8_MOUSE:P05214|TBA3_MOUSE:P05213|TBA1B_MOUSE:P68369|TBA1A_MOUSE		1	1
B16-F10	ESFPGFVNL	9	Q6ZWR6-4|SYNE1_MOUSE:Q6ZWR6|SYNE1_MOUSE		1	1
B16-F10	ESGPSIVHRKCF	12	P60710|ACTB_MOUSE:P63260|ACTG_MOUSE	1		1
B16-F10	ESPLFNNV	8	Q9CQ80-2|VPS25_MOUSE:Q9CQ80|VPS25_MOUSE		1	1
B16-F10	ETPVYANL	8	P15066|JUND_MOUSE	1		1
B16-F10	FAYRFSNL	8	Q8BU03|PWP2_MOUSE		1	1
B16-F10	FQFIFASM	8	Q6NZJ6-2|IF4G1_MOUSE:Q6NZJ6|IF4G1_MOUSE		1	1
B16-F10	FQIVNPHLL	9	P07742|RIR1_MOUSE	1		1
B16-F10	FSAEVQLIH	9	O70354|CAH11_MOUSE	1		1
B16-F10	FVYVFHTL	8	Q99P91|GPNMB_MOUSE	1	1	2
B16-F10	GDPKEEEEEELVD	13	P99028|QCR6_MOUSE	1		1
B16-F10	GFDYKERL	8	Q60598|SRC8_MOUSE	1	1	2
B16-F10	GGQVSLRVIND	11	Q60696|PMEL_MOUSE	1	1	2
B16-F10	GGRVQAVLTSD	11	Q99P91|GPNMB_MOUSE	1		1
B16-F10	GIVSKNF	7	Q9CQR2|RS21_MOUSE:Q9JK92|HSPB8_MOUSE	1		1
B16-F10	GKIGVKFNV	9	Q9CS84|NRX1A_MOUSE:P0DI97|NRX1B_MOUSE	1		1
B16-F10	GLEDERKMLTGSGD	14	P99028|QCR6_MOUSE	1		1
B16-F10	GLQKAVVNLD	10	A0A0B4J1G0|FCGR4_MOUSE	1	1	2
B16-F10	GPGGGYGA	8	Q07563|COHA1_MOUSE	1		1
B16-F10	GPGGVTGI	8	P54320|ELN_MOUSE	1		1
B16-F10	GPKYIHL	7	Q60805|MERTK_MOUSE		1	1
B16-F10	GQVSLRVIND	10	Q60696|PMEL_MOUSE	1		1
B16-F10	GQYEFHSL	8	Q61805|LBP_MOUSE		1	1
B16-F10	GRVQAVLTSD	10	Q99P91|GPNMB_MOUSE	1		1
B16-F10	GYEPPVQESV	10	P97351|RS3A_MOUSE	1		1
B16-F10	GYGSGRGFGD	10	O88569|ROA2_MOUSE	1		1
B16-F10	GYIYHKL	7	Q9EPU0|RENT1_MOUSE	1	1	2
B16-F10	GYTLLAAI	8	Q9EP89|LACTB_MOUSE	1		1
B16-F10	HGYTFANL	8	Q9R1T2-2|SAE1_MOUSE:Q9R1T2|SAE1_MOUSE		1	1
B16-F10	HQYQFNNL	8	P05555-2|ITAM_MOUSE:P05555|ITAM_MOUSE		1	1
B16-F10	IAAGGSLL	8	P70207|PLXA2_MOUSE	1		1
B16-F10	IAFIFNNL	8	Q6ZQ08|CNOT1_MOUSE	1	1	2
B16-F10	IALRYVAL	8	Q9JIF7|COPB_MOUSE		1	1
B16-F10	IAVSFREL	8	Q8BJW5-2|NOL11_MOUSE:Q8BJW5|NOL11_MOUSE		1	1
B16-F10	IAYAFFHL	8	Q8K4P7-3|ST7L_MOUSE:Q99M96-7|ST7_MOUSE:Q99M96-9|ST7_MOUSE:Q99M96-4|ST7_MOUSE:Q99M96-6|ST7_MOUSE:Q99M96-8|ST7_MOUSE:Q99M96-5|ST7_MOUSE:Q99M96-3|ST7_MOUSE:Q8K4P7|ST7L_MOUSE:Q99M96-2|ST7_MOUSE:Q99M96|ST7_MOUSE		1	1
B16-F10	ICFKFDHL	8	P47754|CAZA2_MOUSE		1	1
B16-F10	IFYYVQKL	8	Q69ZR2|HECD1_MOUSE	1	1	2
B16-F10	IGAEVYHNL	9	P17182|ENOA_MOUSE	1	1	2
B16-F10	IGIVKQAGL	9	Q9Z2X1|HNRPF_MOUSE	1	1	2
B16-F10	IGPTYYQRL	9	Q8CFI7|RPB2_MOUSE		1	1
B16-F10	IGYAFVHL	8	C3VPR6-2|NLRC5_MOUSE:C3VPR6|NLRC5_MOUSE		1	1
B16-F10	IIFEEHTQSPLFVG	14	Q00896|A1AT3_MOUSE	1		1
B16-F10	IILKYIGM	8	Q9JKW0|AR6P1_MOUSE	1	1	2
B16-F10	IIPMFSNL	8	Q76MZ3|2AAA_MOUSE		1	1
B16-F10	IIRSMPEQTGEK	12	P62889|RL30_MOUSE	1		1
B16-F10	IISTFQNL	8	Q6DID3|SCAF8_MOUSE		1	1
B16-F10	IITGFRNV	8	Q9Z1S0|BUB1B_MOUSE		1	1
B16-F10	IIYEFESSTQM	11	Q9DB00|GON4L_MOUSE		1	1
B16-F10	IIYPPPEV	8	Q8K4Z5|SF3A1_MOUSE		1	1
B16-F10	IIYTFPVL	8	Q8VDB2|ALG12_MOUSE		1	1
B16-F10	IMYDKHIQM	9	Q80SU7|GVIN1_MOUSE	1	1	2
B16-F10	INFDFNTI	8	Q8CDD8|KCD20_MOUSE		1	1
B16-F10	INFDFPKL	8	P54823|DDX6_MOUSE	1	1	2
B16-F10	INLTFLDL	8	Q62192|CD180_MOUSE		1	1
B16-F10	INTEFKNT	8	P20152|VIME_MOUSE	1	1	2
B16-F10	INYSYINL	8	B1AY13|UBP24_MOUSE	1		1
B16-F10	IQLTHVQT	8	O08573|LEG9_MOUSE	1		1
B16-F10	IRYIFAYL	8	Q9JHF7|HPGDS_MOUSE		1	1
B16-F10	ISFEFRSL	8	Q3THF9|CQ10B_MOUSE	1	1	2
B16-F10	ISFKFDHL	8	P47753|CAZA1_MOUSE		1	1
B16-F10	ISFKWAFL	8	Q9D8M3|HRG1_MOUSE		1	1
B16-F10	ISFYSRDQLNI	11	Q5H8C4|VP13A_MOUSE	1		1
B16-F10	ISILYHQL	8	Q9D2V5|AAR2_MOUSE		1	1
B16-F10	ISLEFRNL	8	P53798|FDFT_MOUSE	1	1	2
B16-F10	ISLEGKPL	8	P18760|COF1_MOUSE		1	1
B16-F10	ISLEYSEL	8	Q3U319|BRE1B_MOUSE		1	1
B16-F10	ISPRFDVQL	9	P62245|RS15A_MOUSE		1	1
B16-F10	ISRTFPNL	8	Q8CGA2|TBC14_MOUSE		1	1
B16-F10	ISSLFSSL	8	Q60603|KCNH1_MOUSE		1	1
B16-F10	ISYLYNKL	8	Q9JM55|TOB2_MOUSE:Q61471|TOB1_MOUSE		1	1
B16-F10	ISYNFIEKL	9	Q05A62-3|DNAL1_MOUSE:Q05A62-2|DNAL1_MOUSE:Q05A62|DNAL1_MOUSE		1	1
B16-F10	ISYQFSNL	8	Q99PQ1|TR12A_MOUSE		1	1
B16-F10	ITFIFKSL	8	Q9JLN9|MTOR_MOUSE		1	1
B16-F10	ITGYFPSM	8	Q09014|NCF1_MOUSE	1	1	2
B16-F10	ITLTSANHAMI	11	P16110|LEG3_MOUSE	1		1
B16-F10	IVFEDFARL	9	Q91YI4|ARRB2_MOUSE:Q91YI4-2|ARRB2_MOUSE		1	1
B16-F10	IVPLFTNL	8	Q7TNP2|2AAB_MOUSE		1	1
B16-F10	IVWEFEQL	8	Q62158|TRI27_MOUSE		1	1
B16-F10	IWIRVASL	8	Q8BRG6|KLH24_MOUSE	1	1	2
B16-F10	KAFTYINL	8	Q62351|TFR1_MOUSE	1	1	2
B16-F10	KALINADEL	9	P16546-2|SPTN1_MOUSE:P16546|SPTN1_MOUSE		1	1
B16-F10	KAPGFAQM	8	P42932|TCPQ_MOUSE		1	1
B16-F10	KETFLSADER	10	Q8VD65|PI3R4_MOUSE	1		1
B16-F10	KGEGPAST	8	Q810U4|NRCAM_MOUSE	1		1
B16-F10	KGFGFGQGAGA	11	P97315|CSRP1_MOUSE		1	1
B16-F10	KGYVFKEL	8	P58681|TLR7_MOUSE		1	1
B16-F10	KIFEFKETL	9	Q8BW96-2|KCC1D_MOUSE:Q8BW96|KCC1D_MOUSE		1	1
B16-F10	KIIEFANI	8	Q61884|MNS1_MOUSE		1	1
B16-F10	KIITYRNL	8	Q8BFV2|PCID2_MOUSE	1		1
B16-F10	KILTFDQL	8	P35980|RL18_MOUSE		1	1
B16-F10	KIQSFINRM	9	Q8C1Y8|CCZ1_MOUSE		1	1
B16-F10	KIYQWINEL	9	Q9JKY0|CNOT9_MOUSE	1	1	2
B16-F10	KNLRYQLL	8	Q8K310|MATR3_MOUSE		1	1
B16-F10	KNVVYRDL	8	P31750|AKT1_MOUSE		1	1
B16-F10	KSFEWLSQM	9	Q9JHU4|DYHC1_MOUSE	1		1
B16-F10	KSFVFSLL	8	P70213|FV1_MOUSE		1	1
B16-F10	KSITFSKL	8	O35459|ECH1_MOUSE		1	1
B16-F10	KSLEYHHL	8	Q80TB7-2|ZSWM6_MOUSE:Q80TB7|ZSWM6_MOUSE		1	1
B16-F10	KSPEYESL	8	Q3V1L4|5NTC_MOUSE		1	1
B16-F10	KSYERINNI	9	Q9Z121|CCL8_MOUSE	1	1	2
B16-F10	KSYLFQLL	8	P97377|CDK2_MOUSE	1	1	2
B16-F10	KSYSFDEV	8	Q99KQ4|NAMPT_MOUSE	1		1
B16-F10	KTFLFSATM	9	Q9CWX9|DDX47_MOUSE	1	1	2
B16-F10	KTVCFQNL	8	Q7TMB8-2|CYFP1_MOUSE:Q7TMB8|CYFP1_MOUSE		1	1
B16-F10	KTWVFSFL	8	Q66K08|CILP1_MOUSE		1	1
B16-F10	KTYQFLNDI	9	Q3UFY0|RRP36_MOUSE		1	1
B16-F10	KVFEFYLL	8	A2AJQ3-2|D19L4_MOUSE:A2AJQ3|D19L4_MOUSE		1	1
B16-F10	KVFEYHNV	8	Q9DAX9|APBP2_MOUSE		1	1
B16-F10	KVLVFNFL	8	Q8BH79-2|ANO10_MOUSE:Q8BH79-3|ANO10_MOUSE:Q8BH79|ANO10_MOUSE:Q8BH79-4|ANO10_MOUSE		1	1
B16-F10	KVLVFSQM	8	Q60848-2|HELLS_MOUSE:Q60848|HELLS_MOUSE		1	1
B16-F10	KVYLYTHL	8	Q8R0A7|K0513_MOUSE		1	1
B16-F10	KVYNYNHL	8	P61358|RL27_MOUSE		1	1
B16-F10	KVYTFNSV	8	Q9R0K7|AT2B2_MOUSE:Q6Q477-2|AT2B4_MOUSE:Q6Q477|AT2B4_MOUSE:G5E829|AT2B1_MOUSE		1	1
B16-F10	LAPVYQRL	8	P82198|BGH3_MOUSE		1	1
B16-F10	LAYLFAQL	8	Q711T7|NADE_MOUSE		1	1
B16-F10	LCKLFIGGL	9	Q9CX86|ROA0_MOUSE	1		1
B16-F10	LDYQFPKI	8	A2ARZ3|FSIP2_MOUSE	1		1
B16-F10	LIYKFLNV	8	Q6P5F9|XPO1_MOUSE	1	1	2
B16-F10	LMAYMASKE	9	P16858|G3P_MOUSE	1	1	2
B16-F10	LNYKFPGL	8	Q3U5C7|PRIC1_MOUSE		1	1
B16-F10	LPKAVVKLD	9	P08508|FCGR3_MOUSE	1		1
B16-F10	LQRQFLEL	8	Q8K2X1|AT10D_MOUSE	1		1
B16-F10	LQYEFTHL	8	Q9JL26-2|FMNL1_MOUSE:Q9JL26|FMNL1_MOUSE		1	1
B16-F10	LQYEFTKL	8	A2APV2|FMNL2_MOUSE:Q6ZPF4|FMNL3_MOUSE	1	1	2
B16-F10	LSYSFAHL	8	A1Z198-3|NL1B2_MOUSE:A1Z198-2|NL1B2_MOUSE:Q2LKU9|NLR1A_MOUSE:A1Z198|NL1B2_MOUSE:Q2LKU9-2|NLR1A_MOUSE		1	1
B16-F10	LSYTRFSLA	9	Q62351|TFR1_MOUSE		1	1
B16-F10	LTQQYHQL	8	P10404|ENV1_MOUSE:P11370|ENV2_MOUSE	1	1	2
B16-F10	MDAIKKKMQMLKLD	14	P58771|TPM1_MOUSE:P58774|TPM2_MOUSE	1		1
B16-F10	MEVKPPPGRPQPD	13	Q8BG05|ROA3_MOUSE	1		1
B16-F10	MILQFGFTTIFVAA	14	Q8C5H1|ANO4_MOUSE	1		1
B16-F10	MKTILSNQTVD	11	P51410|RL9_MOUSE	1		1
B16-F10	MSFQFAHL	8	Q80TY5|VP13B_MOUSE		1	1
B16-F10	MTFLFANL	8	Q3UYK3-2|TBCD9_MOUSE:Q5SVR0-2|TBC9B_MOUSE:Q5SVR0|TBC9B_MOUSE:Q3UYK3|TBCD9_MOUSE		1	1
B16-F10	NFLVYQNI	8	Q8C779|RADX_MOUSE	1		1
B16-F10	NSFRYNGL	8	P41105|RL28_MOUSE		1	1
B16-F10	NSIRNLDTI	9	P28658|ATX10_MOUSE		1	1
B16-F10	NSLAYSNL	8	P97769|CITE1_MOUSE		1	1
B16-F10	NTYKYAKI	8	Q7TQI7|ABTB2_MOUSE		1	1
B16-F10	NVWRFPYL	8	O35316|SC6A6_MOUSE		1	1
B16-F10	PAGKLKYFDKLN	12	O08807|PRDX4_MOUSE	1		1
B16-F10	PAYHSSLMD	9	Q9JM76|ARPC3_MOUSE	1	1	2
B16-F10	PEDVITGAFKVLD	13	P97457|MLRS_MOUSE	1		1
B16-F10	PKAVVKLD	8	P08508|FCGR3_MOUSE	1	1	2
B16-F10	PKFEVIDKPQS	11	P97450|ATP5J_MOUSE	1	1	2
B16-F10	PLDRALAE	8	P13020|GELS_MOUSE	1		1
B16-F10	PLDRALAELAA	11	P13020|GELS_MOUSE	1		1
B16-F10	PLDSTSRIMD	10	P56480|ATPB_MOUSE		1	1
B16-F10	PLLQDKPRTL	10	Q99P91|GPNMB_MOUSE		1	1
B16-F10	PPSAKAAID	9	P56959|FUS_MOUSE	1		1
B16-F10	PPSAKAAIDWF	11	P56959|FUS_MOUSE	1		1
B16-F10	PPSAKAAIDWFD	12	P56959|FUS_MOUSE	1		1
B16-F10	PPTAKAAVEWFD	12	Q61545|EWS_MOUSE	1		1
B16-F10	PQPSGGAGG	9	Q8JZQ2|AFG32_MOUSE	1		1
B16-F10	PSKIQLPEDD	10	O09111|NDUBB_MOUSE	1	1	2
B16-F10	PSNIFGNRNLL	11	Q8C0I1|ADAS_MOUSE	1	1	2
B16-F10	PVYRMVD	7	Q922Q1|MARC2_MOUSE		1	1
B16-F10	QALKYFNL	8	Q9Z2G6-2|SE1L1_MOUSE:Q9Z2G6|SE1L1_MOUSE		1	1
B16-F10	QIIAFFAHL	9	Q8CHI8-5|EP400_MOUSE:Q8CHI8-3|EP400_MOUSE:Q8CHI8-2|EP400_MOUSE:Q8CHI8-4|EP400_MOUSE:Q8CHI8|EP400_MOUSE		1	1
B16-F10	QIIPFKTL	8	Q8BVY0|RL1D1_MOUSE	1	1	2
B16-F10	QIIRFLLL	8	O70228|ATP9A_MOUSE		1	1
B16-F10	QILSDFPKL	9	Q99ME9|NOG1_MOUSE	1	1	2
B16-F10	QNPVYAPL	8	P14901|HMOX1_MOUSE		1	1
B16-F10	QNYTYSSL	8	Q810S1|MCUB_MOUSE		1	1
B16-F10	QPVSCPTT	8	Q60675|LAMA2_MOUSE	1		1
B16-F10	QSIAFISRL	9	Q9CR67|TMM33_MOUSE	1	1	2
B16-F10	QSIEFSRL	8	P23116|EIF3A_MOUSE		1	1
B16-F10	QSLVFKLS	8	Q3V3Z3-2|AGRG5_MOUSE:Q3V3Z3|AGRG5_MOUSE		1	1
B16-F10	QSPEYENL	8	Q6ZWR6-4|SYNE1_MOUSE:Q6ZWR6|SYNE1_MOUSE		1	1
B16-F10	QSVDMKIGV	9	P15379|CD44_MOUSE	1	1	2
B16-F10	QSYEFFHL	8	Q8BHB0|NOD1_MOUSE	1		1
B16-F10	QTYDYRNI	8	Q9JHI7|EXOS9_MOUSE		1	1
B16-F10	QVIRFEKV	8	P14106|C1QB_MOUSE	1	1	2
B16-F10	QVVQFNRL	8	O88653|LTOR3_MOUSE		1	1
B16-F10	RAPSYRTL	8	Q924W7-3|ST5_MOUSE:Q924W7-2|ST5_MOUSE:Q924W7|ST5_MOUSE		1	1
B16-F10	RAYLFAHV	8	Q5SWD9-3|TSR1_MOUSE:Q5SWD9-2|TSR1_MOUSE:Q5SWD9|TSR1_MOUSE		1	1
B16-F10	RELFPVFTQL	10	Q99KU6|CF089_MOUSE	1	1	2
B16-F10	RGPTYVNM	8	Q8K2K6-3|AGFG1_MOUSE:Q8K2K6-2|AGFG1_MOUSE:Q8K2K6-1|AGFG1_MOUSE:Q8K2K6|AGFG1_MOUSE		1	1
B16-F10	RGYEFLGV	8	Q8K3B1|FBSP1_MOUSE	1		1
B16-F10	RGYSFTTT	8	P63260|ACTG_MOUSE:P60710|ACTB_MOUSE		1	1
B16-F10	RGYSFTTTA	9	P63260|ACTG_MOUSE:P60710|ACTB_MOUSE		1	1
B16-F10	RGYVFREL	8	P58682|TLR8_MOUSE		1	1
B16-F10	RIAELTSQL	9	Q3TDD9-2|PPR21_MOUSE:Q3TDD9|PPR21_MOUSE		1	1
B16-F10	RILEFFGL	8	P09103|PDIA1_MOUSE		1	1
B16-F10	RIVELEGRV	9	Q91XA2|GOLM1_MOUSE		1	1
B16-F10	RIVELFRNL	9	P42227|STAT3_MOUSE	1	1	2
B16-F10	RIYGFTAV	8	Q69ZR2|HECD1_MOUSE		1	1
B16-F10	RIYGKFLGL	9	Q60996-2|2A5G_MOUSE:Q61151|2A5E_MOUSE:Q60996-3|2A5G_MOUSE:Q6PD03|2A5A_MOUSE:Q60996-4|2A5G_MOUSE:Q60996|2A5G_MOUSE		1	1
B16-F10	RIYQFTAA	8	Q3UND0-2|SKAP2_MOUSE:Q3UND0|SKAP2_MOUSE		1	1
B16-F10	RNFIFSRL	8	Q60848|HELLS_MOUSE	1	1	2
B16-F10	RNPQFQKL	8	P06745|G6PI_MOUSE		1	1
B16-F10	RNYEYLIRL	9	Q8R3L2|TCF25_MOUSE	1	1	2
B16-F10	RNYQFDFL	8	Q8K4Z5|SF3A1_MOUSE	1	1	2
B16-F10	RNYSYEKL	8	Q02257|PLAK_MOUSE		1	1
B16-F10	RQYIFSKL	8	Q80SU7|GVIN1_MOUSE	1	1	2
B16-F10	RSPEYLSL	8	Q9JLV5|CUL3_MOUSE		1	1
B16-F10	RSYDFEFM	8	P40336|VP26A_MOUSE	1	1	2
B16-F10	RSYLFLGGI	9	Q9D2C7|BI1_MOUSE		1	1
B16-F10	RSYSFLNSSL	10	Q9D7J6|DNSL1_MOUSE		1	1
B16-F10	RTLIYITL	8	Q9JM76|ARPC3_MOUSE	1	1	2
B16-F10	RTYIFTFL	8	Q8JZL7-2|RGF1B_MOUSE:Q8JZL7|RGF1B_MOUSE		1	1
B16-F10	RTYTYEKL	8	Q02248|CTNB1_MOUSE	1	1	2
B16-F10	RVAEFTTNL	9	Q8VDD5|MYH9_MOUSE	1	1	2
B16-F10	RVLIFSQM	8	Q6PDQ2|CHD4_MOUSE:E9PZM4|CHD2_MOUSE:Q6PGB8|SMCA1_MOUSE:Q91ZW3|SMCA5_MOUSE:P40201|CHD1_MOUSE:A2A8L1|CHD5_MOUSE:A2AJK6|CHD7_MOUSE	1	1	2
B16-F10	RVLLFSQM	8	Q9CXF7|CHD1L_MOUSE	1		1
B16-F10	RVMEYINRL	9	Q68FD5|CLH_MOUSE		1	1
B16-F10	RVYEFLDKL	9	P14685|PSMD3_MOUSE		1	1
B16-F10	SAARFALL	8	Q924N4-2|S12A6_MOUSE:Q924N4|S12A6_MOUSE		1	1
B16-F10	SAFFFGAL	8	O35604|NPC1_MOUSE		1	1
B16-F10	SAFSFRTL	8	Q8BMI0|FBX38_MOUSE		1	1
B16-F10	SALEFLTHL	9	Q8C3R1-2|BRAT1_MOUSE:Q8C3R1|BRAT1_MOUSE		1	1
B16-F10	SALIYSNL	8	O55013|TPPC3_MOUSE	1	1	2
B16-F10	SALRFLNL	8	Q3TAA7|S11IP_MOUSE		1	1
B16-F10	SALRFQAM	8	Q8K285|FCHO1_MOUSE		1	1
B16-F10	SALTFAGL	8	Q9CXV1|DHSD_MOUSE		1	1
B16-F10	SALVFTRL	8	Q9JHJ3|GLMP_MOUSE	1	1	2
B16-F10	SAMVFSAM	8	P63082|VATL_MOUSE		1	1
B16-F10	SAPENAVRM	9	O35127|C10_MOUSE		1	1
B16-F10	SAPEYVFL	8	Q7TNB8-2|SBNO2_MOUSE:Q7TNB8|SBNO2_MOUSE		1	1
B16-F10	SAPLYTNL	8	Q8K4S1|PLCE1_MOUSE		1	1
B16-F10	SAPQFSKL	8	Q8K007|SULF1_MOUSE	1	1	2
B16-F10	SAVSFHSL	8	Q8BZT9|LACC1_MOUSE		1	1
B16-F10	SAVVYAQL	8	P97789-3|XRN1_MOUSE:P97789-2|XRN1_MOUSE:P97789|XRN1_MOUSE		1	1
B16-F10	SAYEFYHA	8	P97481|EPAS1_MOUSE	1		1
B16-F10	SAYEFYHAL	9	P97481|EPAS1_MOUSE		1	1
B16-F10	SAYEVIKL	8	P06151|LDHA_MOUSE		1	1
B16-F10	SAYLFTYV	8	Q8BLQ7|CTR4_MOUSE		1	1
B16-F10	SAYQRGESL	9	O35382|EXOC4_MOUSE	1	1	2
B16-F10	SAYRFSGV	8	Q8CJF7|ELYS_MOUSE	1		1
B16-F10	SDIIRSMPEQTGEK	14	P62889|RL30_MOUSE	1		1
B16-F10	SEEQFGGD	8	Q60668|HNRPD_MOUSE	1		1
B16-F10	SFKFDHL	7	P47753|CAZA1_MOUSE		1	1
B16-F10	SFLDVRNI	8	Q8VDM4|PSMD2_MOUSE		1	1
B16-F10	SFLDVRNL	8	Q8BRH0-2|TMTC3_MOUSE:Q8BRH0|TMTC3_MOUSE		1	1
B16-F10	SFYEHIITV	9	Q8BGZ3|DCA12_MOUSE		1	1
B16-F10	SGFVFTRL	8	Q6PCN7|HLTF_MOUSE	1	1	2
B16-F10	SGIDFKQL	8	O55222|ILK_MOUSE	1	1	2
B16-F10	SGLKYVAV	8	Q923D2|BLVRB_MOUSE		1	1
B16-F10	SGLKYVNV	8	Q8VCP8|KAD6_MOUSE	1	1	2
B16-F10	SGPDLSTAL	9	Q91VS7|MGST1_MOUSE		1	1
B16-F10	SGPDLSTALM	10	Q91VS7|MGST1_MOUSE		1	1
B16-F10	SGPTYIKL	8	Q6NSR3|ADCK2_MOUSE		1	1
B16-F10	SGVYYTARV	9	P16382-2|IL4RA_MOUSE:P16382-3|IL4RA_MOUSE:P16382|IL4RA_MOUSE		1	1
B16-F10	SGYDFENRL	9	Q8VE09|TT39C_MOUSE	1	1	2
B16-F10	SGYDFSRL	8	Q6GQT6|SCAP_MOUSE	1	1	2
B16-F10	SGYEFIHKL	9	Q8BYL4|SYYM_MOUSE		1	1
B16-F10	SGYIYHKL	8	Q9EPU0|RENT1_MOUSE	1	1	2
B16-F10	SGYKFFSL	8	Q80W47|WIPI2_MOUSE	1	1	2
B16-F10	SGYKFGVL	8	Q9D902|T2EB_MOUSE		1	1
B16-F10	SGYKYVGM	8	Q91XB7|YIF1A_MOUSE	1	1	2
B16-F10	SGYSFTHI	8	Q9D864|ARP6_MOUSE	1	1	2
B16-F10	SIAAFIQRL	9	Q9Z1R2|BAG6_MOUSE	1	1	2
B16-F10	SIANFTNV	8	Q91V92|ACLY_MOUSE	1	1	2
B16-F10	SIIIFTNT	8	Q4FZF3|DDX49_MOUSE		1	1
B16-F10	SIIKATNL	8	Q80X82|SYMPK_MOUSE	1	1	2
B16-F10	SIINFIERL	9	Q9QZ09|PHTF1_MOUSE		1	1
B16-F10	SIIVFNLV	8	P42867|GPT_MOUSE		1	1
B16-F10	SILKFFEI	8	P34152-7|FAK1_MOUSE:P34152-6|FAK1_MOUSE:P34152-5|FAK1_MOUSE:P34152-3|FAK1_MOUSE:P34152-4|FAK1_MOUSE:P34152-2|FAK1_MOUSE:P34152|FAK1_MOUSE		1	1
B16-F10	SILRFITI	8	P22366-2|MYD88_MOUSE:P22366|MYD88_MOUSE		1	1
B16-F10	SILRIHAREIFD	12	P17182|ENOA_MOUSE	1	1	2
B16-F10	SILTYAFL	8	Q8BZ00|SL9A9_MOUSE		1	1
B16-F10	SIMAFHKL	8	Q7TPM9|MTMRA_MOUSE		1	1
B16-F10	SITSFPRL	8	Q99JP7|GGT7_MOUSE		1	1
B16-F10	SIVQFYYM	8	Q9R190|MTA2_MOUSE	1	1	2
B16-F10	SIVSYNHL	8	Q9JHU9|INO1_MOUSE		1	1
B16-F10	SIYDAFPKV	9	Q9QXZ0-3|MACF1_MOUSE:Q9QXZ0-2|MACF1_MOUSE:Q9QXZ0-4|MACF1_MOUSE:Q9QXZ0|MACF1_MOUSE		1	1
B16-F10	SIYPLHDVFV	10	P97351|RS3A_MOUSE	1		1
B16-F10	SKYDFPKL	8	Q62293|TGTP1_MOUSE:Q3T9E4|TGTP2_MOUSE		1	1
B16-F10	SLILFSTRL	9	Q9QUK4|BIR1B_MOUSE		1	1
B16-F10	SLKIQTSNVTNKND	14	Q64012|RALY_MOUSE	1		1
B16-F10	SLLLLAPL	8	Q9R0E2|PLOD1_MOUSE		1	1
B16-F10	SLLPSSNL	8	Q9CW46|RAVR1_MOUSE		1	1
B16-F10	SLNLRETNL	9	P20152|VIME_MOUSE		1	1
B16-F10	SLVDLNTRL	9	Q922Q1|MARC2_MOUSE		1	1
B16-F10	SLVTFRTL	8	Q9QXS1-15|PLEC_MOUSE:Q9QXS1-10|PLEC_MOUSE:Q9QXS1-9|PLEC_MOUSE:Q9QXS1-12|PLEC_MOUSE:Q9QXS1-11|PLEC_MOUSE:Q9QXS1-13|PLEC_MOUSE:Q9QXS1-3|PLEC_MOUSE:Q9QXS1-5|PLEC_MOUSE:Q9QXS1-16|PLEC_MOUSE:Q9QXS1-4|PLEC_MOUSE:Q9QXS1-14|PLEC_MOUSE:Q9QXS1-6|PLEC_MOUSE:Q9QXS1-7|PLEC_MOUSE:Q9QXS1-8|PLEC_MOUSE:Q9QXS1-2|PLEC_MOUSE:Q9QXS1|PLEC_MOUSE		1	1
B16-F10	SLYDAFPKV	9	Q91ZU6-8|DYST_MOUSE:Q91ZU6-6|DYST_MOUSE:Q91ZU6-2|DYST_MOUSE:Q91ZU6|DYST_MOUSE:Q91ZU6-3|DYST_MOUSE:Q91ZU6-4|DYST_MOUSE		1	1
B16-F10	SMAGFGGVGRM	11	Q8C854|MYEF2_MOUSE	1	1	2
B16-F10	SMILFTSL	8	P28658|ATX10_MOUSE		1	1
B16-F10	SMQTVFNM	8	Q60865|CAPR1_MOUSE		1	1
B16-F10	SMVDVVML	8	Q9Z1R2|BAG6_MOUSE		1	1
B16-F10	SMYQPLNL	8	Q8VI38|GBGT1_MOUSE		1	1
B16-F10	SMYVPGKL	8	Q9WU28|PFD5_MOUSE		1	1
B16-F10	SNFGPMKGGNFGG	13	P49312|ROA1_MOUSE	1		1
B16-F10	SNHVFNAL	8	Q9DBU3|RIOK3_MOUSE		1	1
B16-F10	SNIQYRSL	8	Q8CH77|NAV1_MOUSE	1	1	2
B16-F10	SNLKYILV	8	A2AWL7-4|MGAP_MOUSE:A2AWL7-2|MGAP_MOUSE:A2AWL7-3|MGAP_MOUSE:A2AWL7|MGAP_MOUSE		1	1
B16-F10	SNPEFRQL	8	Q3UWM4|KDM7A_MOUSE	1	1	2
B16-F10	SNPEFSSV	8	P26039|TLN1_MOUSE	1	1	2
B16-F10	SNYERLESL	9	P43883|PLIN2_MOUSE		1	1
B16-F10	SNYHFYSSI	9	Q60795|NF2L2_MOUSE	1	1	2
B16-F10	SNYLFTKL	8	P97481|EPAS1_MOUSE	1	1	2
B16-F10	SNYQHITNF	9	O54774|AP3D1_MOUSE	1	1	2
B16-F10	SNYSYPQV	8	Q61545|EWS_MOUSE	1	1	2
B16-F10	SNYVFVFL	8	Q9Z0S9|PRAF1_MOUSE		1	1
B16-F10	SPTTPSVFSPSGNR	14	Q8BG30|NELFA_MOUSE	1		1
B16-F10	SQFKYALV	8	Q9QXB9|DRG2_MOUSE		1	1
B16-F10	SQVISNAK	8	Q61316|HSP74_MOUSE	1		1
B16-F10	SQVMNLHNL	9	P29812|TYRP2_MOUSE	1	1	2
B16-F10	SQYLFPKL	8	P35396|PPARD_MOUSE	1		1
B16-F10	SQYRFEHL	8	Q3UJK4|GTPB2_MOUSE		1	1
B16-F10	SQYVFTEM	8	Q5SYH2|TM199_MOUSE		1	1
B16-F10	SRDAVRIPTVDGRP	14	A2A7S8|K1522_MOUSE	1		1
B16-F10	SRIVFRHL	8	Q9CR88|RT14_MOUSE		1	1
B16-F10	SRQESQAPER	10	Q8C804|SPICE_MOUSE	1		1
B16-F10	SRYQFRNL	8	Q8R035-2|ICT1_MOUSE:Q8R035|ICT1_MOUSE		1	1
B16-F10	SSAIYMNL	8	Q8VHR5-2|P66B_MOUSE:Q8VHR5|P66B_MOUSE		1	1
B16-F10	SSFLFSYL	8	P23738|DCHS_MOUSE		1	1
B16-F10	SSFVFLNL	8	Q64310|SURF4_MOUSE		1	1
B16-F10	SSFVFSTV	8	Q01237|HMDH_MOUSE	1	1	2
B16-F10	SSIVFAEL	8	Q9Z2R9|E2AK1_MOUSE		1	1
B16-F10	SSLEFTEL	8	O08738|CASP6_MOUSE	1		1
B16-F10	SSLHPMGGL	9	P28659-2|CELF1_MOUSE:P28659-3|CELF1_MOUSE:P28659|CELF1_MOUSE:P28659-4|CELF1_MOUSE		1	1
B16-F10	SSLKFLLL	8	Q6AXC6|DDX11_MOUSE		1	1
B16-F10	SSLLFVKL	8	Q80ZV0|RNH2B_MOUSE		1	1
B16-F10	SSPHYTTL	8	P27046|MA2A1_MOUSE	1	1	2
B16-F10	SSPKFSEI	8	Q91VM3-2|WIPI4_MOUSE:Q91VM3|WIPI4_MOUSE		1	1
B16-F10	SSPKFSEL	8	A2AGT5|CKAP5_MOUSE	1	1	2
B16-F10	SSVKFNPV	8	Q6PAC3|DCA13_MOUSE	1	1	2
B16-F10	SSVYFRSV	8	Q9D6Y4|BORC8_MOUSE		1	1
B16-F10	SSVYFVAL	8	P03953-2|CFAD_MOUSE:P03953|CFAD_MOUSE		1	1
B16-F10	SSWWTHVEMGPPD	13	P05202|AATM_MOUSE	1		1
B16-F10	SSYAYTKV	8	Q8BG87|TET3_MOUSE:Q8BG87-4|TET3_MOUSE		1	1
B16-F10	SSYFFGKL	8	Q99P81|ABCG3_MOUSE	1	1	2
B16-F10	SSYIFSLV	8	P41438-2|S19A1_MOUSE		1	1
B16-F10	SSYKFNHL	8	Q8K2I1|FNTB_MOUSE	1	1	2
B16-F10	SSYSFRHL	8	O35448|PPT2_MOUSE	1	1	2
B16-F10	SSYTFPKM	8	Q9WUR2|ECI2_MOUSE	1	1	2
B16-F10	SSYVHSNL	8	Q6P4T1|SNX19_MOUSE	1	1	2
B16-F10	STFIYNSI	8	Q9Z0E6|GBP2_MOUSE:Q01514|GBP1_MOUSE		1	1
B16-F10	STFVYNSM	8	Q61107|GBP4_MOUSE	1	1	2
B16-F10	STFVYNTM	8	Q8CFB4|GBP5_MOUSE		1	1
B16-F10	STIEFKNM	8	Q6NXI6|RPRD2_MOUSE	1	1	2
B16-F10	STLIYRNM	8	Q9D8N6|LIN37_MOUSE	1	1	2
B16-F10	STLTYSRM	8	Q9WVC6|SGK1_MOUSE	1	1	2
B16-F10	STVEFTNL	8	O54692|ZW10_MOUSE	1	1	2
B16-F10	STYKFFEV	8	Q9CZM2|RL15_MOUSE	1	1	2
B16-F10	STYSVAKM	8	O09159|MA2B1_MOUSE	1		1
B16-F10	SVICFVGL	8	P47774|CCR7_MOUSE		1	1
B16-F10	SVIKFENL	8	Q9CPV7|ZDHC6_MOUSE	1	1	2
B16-F10	SVVAFHNL	8	Q71B07|D19L3_MOUSE		1	1
B16-F10	SVVAYNNL	8	Q99LM9|TADA1_MOUSE	1	1	2
B16-F10	SVVRYVQL	8	O35900|LSM2_MOUSE		1	1
B16-F10	SVYKFFDL	8	P13405|RB_MOUSE		1	1
B16-F10	SVYPFTLI	8	Q8BGF9|S2544_MOUSE		1	1
B16-F10	SVYQPAQL	8	B2RVL6|ZCH24_MOUSE		1	1
B16-F10	SVYTHSYL	8	Q8K0L2-2|ENTP8_MOUSE:Q8K0L2|ENTP8_MOUSE:Q3TZX8-3|NOL9_MOUSE:Q3TZX8-2|NOL9_MOUSE:Q3TZX8|NOL9_MOUSE		1	1
B16-F10	SVYVYKVL	8	P10854|H2B1M_MOUSE:Q8CGP2|H2B1P_MOUSE:Q8CGP1|H2B1K_MOUSE:Q64525|H2B2B_MOUSE:Q64478|H2B1H_MOUSE:Q6ZWY9|H2B1C_MOUSE:P10853|H2B1F_MOUSE:Q64475|H2B1B_MOUSE	1	1	2
B16-F10	SWIEVQFL	8	Q9Z1K5|ARI1_MOUSE		1	1
B16-F10	SYKFNHL	7	Q8K2I1|FNTB_MOUSE		1	1
B16-F10	SYTWDFGDGTGTL	13	Q60696|PMEL_MOUSE		1	1
B16-F10	TAFQFLQL	8	P51945|CCNG1_MOUSE		1	1
B16-F10	TAFVFPRL	8	Q8BK62|OLFL3_MOUSE		1	1
B16-F10	TAISFNLL	8	P41251|NRAM1_MOUSE		1	1
B16-F10	TALDHYSEL	9	Q6ZWQ0-3|SYNE2_MOUSE:Q6ZWQ0|SYNE2_MOUSE		1	1
B16-F10	TAPEYVFL	8	Q689Z5|SBNO1_MOUSE:Q689Z5-2|SBNO1_MOUSE		1	1
B16-F10	TAPVYNQV	8	Q6ZQ73|CAND2_MOUSE		1	1
B16-F10	TAYAFHFL	8	Q9R0H0-2|ACOX1_MOUSE:Q9R0H0|ACOX1_MOUSE		1	1
B16-F10	TAYEFAKL	8	Q9EQ06|DHB11_MOUSE	1	1	2
B16-F10	TAYRPPAL	8	Q8BJW6-2|EIF2A_MOUSE:Q8BJW6|EIF2A_MOUSE		1	1
B16-F10	TEYVFTHL	8	Q6NWW9|FND3B_MOUSE		1	1
B16-F10	TGPKYIHL	8	Q60805|MERTK_MOUSE		1	1
B16-F10	TGYNFQRV	8	Q922V4|PLRG1_MOUSE		1	1
B16-F10	TIFAFINV	8	P70414|NAC1_MOUSE		1	1
B16-F10	TIIIFHSL	8	P97480|EYA3_MOUSE:O08575|EYA2_MOUSE	1	1	2
B16-F10	TIILFTKV	8	Q8K2V6|IPO11_MOUSE:Q8K2V6-2|IPO11_MOUSE		1	1
B16-F10	TILEFAQL	8	Q91XL3|UXS1_MOUSE		1	1
B16-F10	TILEFSQNM	9	Q6P5F9|XPO1_MOUSE	1	1	2
B16-F10	TILSFTNL	8	Q8CFE6|S38A2_MOUSE		1	1
B16-F10	TINQSLLQPL	10	Q3UV17|K22O_MOUSE:P04104|K2C1_MOUSE	1		1
B16-F10	TIVEFLHSF	9	Q91YE5-2|BAZ2A_MOUSE:Q91YE5|BAZ2A_MOUSE:Q91YE5-3|BAZ2A_MOUSE		1	1
B16-F10	TIYDFWRM	8	P28828|PTPRM_MOUSE		1	1
B16-F10	TIYEYGAL	8	P46412|GPX3_MOUSE		1	1
B16-F10	TIYKFQGM	8	Q8R2T8-2|TF3C5_MOUSE:Q8R2T8|TF3C5_MOUSE		1	1
B16-F10	TIYRFLKL	8	Q8CEF1|FEM1C_MOUSE	1		1
B16-F10	TLVEFRNL	8	Q3V1G4|OLM2B_MOUSE		1	1
B16-F10	TLWGIQKELQF	11	P06151|LDHA_MOUSE	1	1	2
B16-F10	TNFEYLTHL	9	P97412|LYST_MOUSE	1		1
B16-F10	TNISFTNM	8	Q9CYY7|PLD3B_MOUSE		1	1
B16-F10	TNLIYQQV	8	P97479|MYO7A_MOUSE	1	1	2
B16-F10	TNLRYLAL	8	P17427|AP2A2_MOUSE:P17426-2|AP2A1_MOUSE:P17426|AP2A1_MOUSE		1	1
B16-F10	TNLVYPAL	8	Q8BLR9-2|HIF1N_MOUSE:Q8BLR9|HIF1N_MOUSE		1	1
B16-F10	TNQDFIQRL	9	Q80TM9|NISCH_MOUSE	1	1	2
B16-F10	TNVDFPSL	8	Q9Z179|SHCBP_MOUSE		1	1
B16-F10	TNVLFNHL	8	Q9D706|RPAP3_MOUSE		1	1
B16-F10	TNVQYSNL	8	Q45VK7|DYHC2_MOUSE	1	1	2
B16-F10	TNVTFSKV	8	Q6P5B0|RRP12_MOUSE		1	1
B16-F10	TNWDDMEKIW	10	P60710|ACTB_MOUSE:P63260|ACTG_MOUSE	1		1
B16-F10	TNYIFDSL	8	Q9CXF4|TBC15_MOUSE		1	1
B16-F10	TNYKFFML	8	Q5Y5T1-2|ZDH20_MOUSE:Q5Y5T1|ZDH20_MOUSE		1	1
B16-F10	TNYRFKNL	8	Q9Z238|CCNE2_MOUSE		1	1
B16-F10	TQLLELMDL	9	Q8BPN8|DMXL2_MOUSE	1		1
B16-F10	TSFRYSSL	8	Q8BX90|FND3A_MOUSE		1	1
B16-F10	TSIAFKNI	8	Q03141-2|MARK3_MOUSE:Q03141-3|MARK3_MOUSE:Q03141|MARK3_MOUSE:Q8VHJ5|MARK1_MOUSE		1	1
B16-F10	TSLAFESRL	9	Q5SXY1-2|CYTSB_MOUSE:Q5SXY1|CYTSB_MOUSE		1	1
B16-F10	TSLRFVFL	8	Q9CQV4|RETR3_MOUSE		1	1
B16-F10	TSPEYQKL	8	Q920R0|ALS2_MOUSE	1	1	2
B16-F10	TSPHYQNL	8	Q61152|PTN18_MOUSE	1	1	2
B16-F10	TSPVFILL	8	Q8R235|TM203_MOUSE		1	1
B16-F10	TSVRFTQL	8	Q9D6T0|NOSIP_MOUSE	1	1	2
B16-F10	TSVVFNKL	8	Q791N7|RPA12_MOUSE		1	1
B16-F10	TSYAFHEL	8	B2RU80|PTPRB_MOUSE		1	1
B16-F10	TSYRFLAL	8	Q8QZX2|HAUS3_MOUSE	1	1	2
B16-F10	TTDAEFHTFFNE	12	P19221|THRB_MOUSE	1		1
B16-F10	TTLQYRSL	8	Q80TN7|NAV3_MOUSE		1	1
B16-F10	TTVAFTQV	8	P12970|RL7A_MOUSE		1	1
B16-F10	TTYKYEMI	8	Q8QZY1|EIF3L_MOUSE		1	1
B16-F10	TTYKYFAL	8	Q5BLK4|TUT7_MOUSE	1		1
B16-F10	TVEVDLYTAKGLF	13	P17182|ENOA_MOUSE	1		1
B16-F10	TVPELTQQM	9	Q9D6F9|TBB4A_MOUSE:Q9CWF2|TBB2B_MOUSE:P68372|TBB4B_MOUSE:Q7TMM9|TBB2A_MOUSE:Q922F4|TBB6_MOUSE:Q9ERD7|TBB3_MOUSE		1	1
B16-F10	TWDFGDGTGTL	11	Q60696|PMEL_MOUSE	1		1
B16-F10	TWDFGDGTGTLIS	13	Q60696|PMEL_MOUSE	1		1
B16-F10	TWDFGDGTGTLISR	14	Q60696|PMEL_MOUSE	1		1
B16-F10	TWLVVTTL	8	P18181|CD48_MOUSE		1	1
B16-F10	VAAFNKI	7	O70251|EF1B_MOUSE	1	1	2
B16-F10	VADKFSEL	8	Q7TNP2|2AAB_MOUSE		1	1
B16-F10	VADKFTEL	8	Q76MZ3|2AAA_MOUSE	1	1	2
B16-F10	VAFAYKNV	8	Q9DCF9|SSRG_MOUSE	1	1	2
B16-F10	VAFDFTKV	8	Q7M6Y3|PICAL_MOUSE	1	1	2
B16-F10	VAIRFDSGL	9	Q9ERU3|ZNF22_MOUSE		1	1
B16-F10	VALDFEQEM	9	P60710|ACTB_MOUSE:P63260|ACTG_MOUSE	1	1	2
B16-F10	VALLFRQL	8	Q6ZPE2|MTMR5_MOUSE:Q6ZPE2-2|MTMR5_MOUSE		1	1
B16-F10	VANKIGII	8	P62751|RL23A_MOUSE		1	1
B16-F10	VAPEEHPVL	9	P60710|ACTB_MOUSE:P63260|ACTG_MOUSE	1		1
B16-F10	VAPFLRQEF	9	Q921N6|DDX27_MOUSE		1	1
B16-F10	VAPGYPLL	8	P21995|EMB_MOUSE	1		1
B16-F10	VAPLYKRL	8	Q8BG87|TET3_MOUSE:Q8BG87-4|TET3_MOUSE		1	1
B16-F10	VAPQALAV	8	Q61838|PZP_MOUSE	1	1	2
B16-F10	VAPSFGTL	8	Q6ZQH8|NU188_MOUSE		1	1
B16-F10	VAPSFGTLL	9	Q6ZQH8|NU188_MOUSE		1	1
B16-F10	VAVDFGNYHL	10	Q9Z127|LAT1_MOUSE	1	1	2
B16-F10	VAVTFSERL	9	Q9WTR6|XCT_MOUSE		1	1
B16-F10	VAYCFITI	8	Q8BWQ6|CP062_MOUSE	1		1
B16-F10	VAYEAPSL	8	P99026|PSB4_MOUSE		1	1
B16-F10	VAYEYLCHL	9	Q9JKF1|IQGA1_MOUSE	1		1
B16-F10	VAYGFRNI	8	Q7TMW6|NARFL_MOUSE	1		1
B16-F10	VAYKFPEL	8	Q6WKZ8|UBR2_MOUSE	1	1	2
B16-F10	VAYKFPELL	9	Q6WKZ8-3|UBR2_MOUSE:Q6WKZ8-2|UBR2_MOUSE:Q6WKZ8|UBR2_MOUSE		1	1
B16-F10	VAYWRQAGL	9	P56382|ATP5E_MOUSE	1	1	2
B16-F10	VFRLLPQL	8	Q9EST5|AN32B_MOUSE:Q9EST5-2|AN32B_MOUSE		1	1
B16-F10	VFTEVANL	8	Q62141-2|SIN3B_MOUSE:Q62141-3|SIN3B_MOUSE:Q62141-1|SIN3B_MOUSE:Q62141|SIN3B_MOUSE		1	1
B16-F10	VFYAVKVL	8	Q9WVC6|SGK1_MOUSE		1	1
B16-F10	VFYEREVQM	9	Q80SY3|VA0D2_MOUSE		1	1
B16-F10	VGFDYKERL	9	Q60598|SRC8_MOUSE		1	1
B16-F10	VGFNVKNV	8	P10126|EF1A1_MOUSE:P62631|EF1A2_MOUSE	1	1	2
B16-F10	VGFRFPIL	8	Q9QUG9|GRP2_MOUSE		1	1
B16-F10	VGFTFPNRL	9	Q9Z0E0|NCDN_MOUSE	1		1
B16-F10	VGINYREV	8	Q01320|TOP2A_MOUSE	1	1	2
B16-F10	VGITYQHI	8	Q9DBZ5|EIF3K_MOUSE	1	1	2
B16-F10	VGPRYTNL	8	P63085|MK01_MOUSE		1	1
B16-F10	VGVTYRTL	8	B1AUR6|MMS22_MOUSE	1	1	2
B16-F10	VGYRFVTAI	9	Q80TM9|NISCH_MOUSE	1	1	2
B16-F10	VGYRYETL	8	Q9DBT5|AMPD2_MOUSE	1	1	2
B16-F10	VIAELVNV	8	Q8K2X8|TF2H5_MOUSE		1	1
B16-F10	VIFIFTKV	8	Q8VCS3|XYLK_MOUSE		1	1
B16-F10	VIISFNSL	8	Q5I012|S38AA_MOUSE	1	1	2
B16-F10	VILEYFTRL	9	Q9CR08|RPP29_MOUSE	1	1	2
B16-F10	VILSFRSL	8	P28660-2|NCKP1_MOUSE:P28660|NCKP1_MOUSE		1	1
B16-F10	VIMKLFPQL	9	Q64FW2|RETST_MOUSE		1	1
B16-F10	VINSFVHV	8	Q9D4H8-2|CUL2_MOUSE:Q9D4H8|CUL2_MOUSE		1	1
B16-F10	VIQVFQQL	8	Q8BHC4|DCAKD_MOUSE	1	1	2
B16-F10	VITNFSARI	9	Q3UVL4|VPS51_MOUSE	1	1	2
B16-F10	VIVEFRDL	8	Q922X9|ANM7_MOUSE	1		1
B16-F10	VIVKFAQL	8	Q6NS46|RRP5_MOUSE		1	1
B16-F10	VIVRFLTV	8	P62245|RS15A_MOUSE	1	1	2
B16-F10	VIVRFLTVM	9	P62245|RS15A_MOUSE	1	1	2
B16-F10	VIYEPFQLL	9	Q6ZPJ0|TEX2_MOUSE		1	1
B16-F10	VIYNPRNL	8	P97481|EPAS1_MOUSE	1	1	2
B16-F10	VIYPFMQGL	9	Q91VV4-2|DEN2D_MOUSE:Q91VV4|DEN2D_MOUSE		1	1
B16-F10	VIYPMAVV	8	Q8C570|RAE1L_MOUSE		1	1
B16-F10	VLDLDLFRVDKGGD	14	P26638|SYSC_MOUSE	1		1
B16-F10	VLPVFDNL	8	P18242|CATD_MOUSE		1	1
B16-F10	VLYRYGSF	8	Q60696|PMEL_MOUSE	1		1
B16-F10	VMDDYSVIGRSL	12	Q9JHW4|SELB_MOUSE		1	1
B16-F10	VMYKFLTV	8	Q9WVC3|CAV2_MOUSE	1	1	2
B16-F10	VNATYVNV	8	P16056|MET_MOUSE	1	1	2
B16-F10	VNDIFERI	8	Q64478|H2B1H_MOUSE:P10854|H2B1M_MOUSE:Q64475|H2B1B_MOUSE:Q6ZWY9|H2B1C_MOUSE:Q64525|H2B2B_MOUSE:Q8CGP1|H2B1K_MOUSE:P10853|H2B1F_MOUSE:Q8CGP2|H2B1P_MOUSE:Q8CGP2-2|H2B1P_MOUSE		1	1
B16-F10	VNDIFERIA	9	Q64478|H2B1H_MOUSE:P10854|H2B1M_MOUSE:Q64475|H2B1B_MOUSE:Q6ZWY9|H2B1C_MOUSE:Q64525|H2B2B_MOUSE:Q8CGP1|H2B1K_MOUSE:P10853|H2B1F_MOUSE:Q8CGP2|H2B1P_MOUSE:Q8CGP2-2|H2B1P_MOUSE		1	1
B16-F10	VNFEFPEF	8	P62082|RS7_MOUSE	1	1	2
B16-F10	VNFEFPEFQL	10	P62082|RS7_MOUSE		1	1
B16-F10	VNFEKFWEL	9	Q8JZL7|RGF1B_MOUSE	1	1	2
B16-F10	VNFPFLVKL	9	P05132-2|KAPCA_MOUSE:P05132|KAPCA_MOUSE		1	1
B16-F10	VNFTYQFL	8	Q3UMB9|WASC4_MOUSE		1	1
B16-F10	VNFVHTNL	8	Q9D8E6|RL4_MOUSE	1	1	2
B16-F10	VNIEFKDL	8	Q64343|ABCG1_MOUSE	1	1	2
B16-F10	VNLAYENV	8	Q9JHU4|DYHC1_MOUSE		1	1
B16-F10	VNLQYSEV	8	P62700|YPEL5_MOUSE		1	1
B16-F10	VNLREYPSL	9	Q8BVK9|SP110_MOUSE		1	1
B16-F10	VNMEKYPDL	9	Q99388|CSPRS_MOUSE:O35892-2|SP100_MOUSE:O35892|SP100_MOUSE		1	1
B16-F10	VNQKFNNL	8	Q8K4R9|DLGP5_MOUSE	1	1	2
B16-F10	VNRVFDKL	8	P28076|PSB9_MOUSE	1	1	2
B16-F10	VNSIFQHL	8	Q80SU7|GVIN1_MOUSE		1	1
B16-F10	VNVCYKEL	8	Q8BKT7|THOC5_MOUSE		1	1
B16-F10	VNVDYSKL	8	Q62425|NDUA4_MOUSE	1	1	2
B16-F10	VNVERVLNV	9	Q6DFV5|HELZ_MOUSE	1	1	2
B16-F10	VNVRFSTI	8	P28563|DUS1_MOUSE		1	1
B16-F10	VNVRFTGV	8	Q76LS9-3|MINY1_MOUSE:Q6PDI6-2|MINY2_MOUSE:Q6PDI6-3|MINY2_MOUSE:Q76LS9-2|MINY1_MOUSE:Q76LS9|MINY1_MOUSE:Q6PDI6|MINY2_MOUSE		1	1
B16-F10	VNYRHLAL	8	P08775|RPB1_MOUSE		1	1
B16-F10	VNYRHLALL	9	P08775|RPB1_MOUSE		1	1
B16-F10	VNYRVPNM	8	Q62077|PLCG1_MOUSE		1	1
B16-F10	VQGPAASSRDAVQA	14	A2A870|FBF1_MOUSE	1		1
B16-F10	VQYKFSHL	8	Q9JHD1|KAT2B_MOUSE:Q9JHD2|KAT2A_MOUSE		1	1
B16-F10	VRYINENL	8	P11983|TCPA_MOUSE		1	1
B16-F10	VRYSHEKL	8	Q8BGQ7|SYAC_MOUSE		1	1
B16-F10	VSAGIQTSF	9	Q61656|DDX5_MOUSE		1	1
B16-F10	VSFTYRYL	8	Q920Q4|VPS16_MOUSE	1	1	2
B16-F10	VSIEHQELM	9	Q80SU7|GVIN1_MOUSE		1	1
B16-F10	VSIQFYHL	8	Q5H8C4|VP13A_MOUSE	1	1	2
B16-F10	VSLRVIND	8	Q60696|PMEL_MOUSE	1		1
B16-F10	VSPLFQKL	8	Q68FL6|SYMC_MOUSE		1	1
B16-F10	VSQYYPKL	8	Q3TEA8-3|HP1B3_MOUSE:Q3TEA8-2|HP1B3_MOUSE:Q3TEA8|HP1B3_MOUSE		1	1
B16-F10	VSVEYTEKM	9	O35130|NEP1_MOUSE	1	1	2
B16-F10	VSVLVALL	8	P04441-2|HG2A_MOUSE:P04441|HG2A_MOUSE		1	1
B16-F10	VSYLFSHV	8	Q9CS42|PRPS2_MOUSE:Q9D7G0|PRPS1_MOUSE		1	1
B16-F10	VSYQFPKL	8	Q924W7-3|ST5_MOUSE:Q924W7-2|ST5_MOUSE:Q924W7|ST5_MOUSE		1	1
B16-F10	VSYSFLEI	8	Q91VU1|YIPF1_MOUSE		1	1
B16-F10	VSYWFDQRF	9	P54751|SIA4A_MOUSE	1		1
B16-F10	VTFSFKQL	8	Q69ZK0-2|PREX1_MOUSE:Q69ZK0|PREX1_MOUSE		1	1
B16-F10	VTITFKNM	8	Q8R4Y4|STAB1_MOUSE	1	1	2
B16-F10	VTYSFRQSF	9	Q8R0S2|IQEC1_MOUSE:Q8R0S2-2|IQEC1_MOUSE:Q5DU25|IQEC2_MOUSE		1	1
B16-F10	VVAEFGRI	8	Q8BXC6|COMD2_MOUSE		1	1
B16-F10	VVFFFKTL	8	Q9JLJ1|SELK_MOUSE		1	1
B16-F10	VVFFFKTLL	9	Q9JLJ1|SELK_MOUSE		1	1
B16-F10	VVFFFTRL	8	P50615|BTG3_MOUSE		1	1
B16-F10	VVFQFQHI	8	P70658-2|CXCR4_MOUSE:P70658|CXCR4_MOUSE		1	1
B16-F10	VVVISGMTGCGKTT	14	Q6P5D3|DHX57_MOUSE	1		1
B16-F10	VVYDLSIRGF	10	Q62348|TSN_MOUSE	1		1
B16-F10	VVYIYHSL	8	Q8CD15|RIOX2_MOUSE		1	1
B16-F10	VVYPFPTF	8	Q6PFH3|DCA15_MOUSE:Q6PFH3-2|DCA15_MOUSE		1	1
B16-F10	VWLEAARL	8	Q91YR7|PRP6_MOUSE	1		1
B16-F10	YDALDVANKIGII	13	P62751|RL23A_MOUSE	1		1
B16-F10	YFSKFGEVVD	10	Q60668|HNRPD_MOUSE	1		1
B16-F10	YFTKFGEVVD	10	Q99020|ROAA_MOUSE	1		1
B16-F10	YTWDFGDGTGTL	12	Q60696|PMEL_MOUSE	1	1	2
B16-F10	YVLDDSD	7	P54818|GALC_MOUSE	1		1
B16-F10	YVLDDSDGLGREFD	14	P54818|GALC_MOUSE	1		1
