# Supplementary material
Source: HighWire-hosted journal article supplement (https://jitc.bmj.com/content/10/10/e004973)
Supplement: inline-supplementary-material-4 [file inline-supplementary-material-4.xlsx]

## Sheet: Supplementary Table 3
Supplementary Table 3. list of all Db peptides (9-11 aa) identified from B16-F10 tumors in this study and the previousely identified peptides in other C57BL/6 tumor-derived cell lines including EL4 (lymphoma), GL261 (malignant glioma) and LLC1 (Lewis lung carcinoma). Peptide sequence, length and accession of the peptides among different tumor cells have been shown.
Peptide	Length	Accession	B16-F101	B16-F102	EL42	GL2612	LLC12	Total
AAAAAAAATT	10	A6H694|LRC63_MOUSE	1					1
AAAKNLSDMTL	11	Q8K1H7|T11L2_MOUSE	1		1		1	3
AAARGLTLL	9	O89023|TPP1_MOUSE	1					1
AAATNLSFL	9	Q61371|IFT88_MOUSE	1					1
AAEDVVATGAD	11	O55022|PGRC1_MOUSE	1					1
AAFRNFSDEI	10	Q8BJ71|NUP93_MOUSE			1		1	2
AAGINRDSL	9	Q91VT4|CBR4_MOUSE	1		1			2
AAGINVEII	9	Q0GNC1|INF2_MOUSE	1				1	2
AAGTNKENL	9	Q8CGN4|BCOR_MOUSE			1			1
AAGVGDMVM	9	P62830|RL23_MOUSE	1					1
AAIANSMNYL	10	Q6P5E4|UGGG1_MOUSE	1					1
AAIEAMNGQYL	11	Q8QZY9|SF3B4_MOUSE	1		1	1	1	4
AAIELSHEI	9	Q4JK59|TET2_MOUSE		1		1		2
AAIENIEHL	9	Q6PB66|LPPRC_MOUSE	1	1	1			3
AAIENIEHLL	10	Q6PB66|LPPRC_MOUSE		1	1		1	3
AAIIDHERI	9	Q3UU96-2|MRCKA_MOUSE:Q3UU96|MRCKA_MOUSE	1					1
AAIKLQELL	9	Q99PL5|RRBP1_MOUSE	1	1		1	1	4
AAILNNAHYL	10	Q9WTS4|TEN1_MOUSE	1			1	1	3
AAINNRLEL	9	Q9CWU2|ZDH13_MOUSE	1	1	1			3
AAIRDGELI	9	Q5SPL2|PHF12_MOUSE					1	1
AAIRNYGIEL	10	Q9WU20|MTHR_MOUSE	1	1	1	1	1	5
AAITNKYQL	9	B2RS91|RRN3_MOUSE	1	1	1	1	1	5
AAITNKYQLVF	11	B2RS91|RRN3_MOUSE		1	1		1	3
AAIVDGDRI	9	Q7TT50|MRCKB_MOUSE	1	1		1	1	4
AAKVALTKRAD	11	Q9QXX4|CMC2_MOUSE	1					1
AALANATVI	9	Q9Z2U2-2|ZN292_MOUSE:Q9Z2U2|ZN292_MOUSE	1		1	1		3
AALANITFF	9	Q3HNM7|INSC_MOUSE	1	1				2
AALANLDNI	9	Q8K2K6|AGFG1_MOUSE	1		1	1		3
AALEKPTTL	9	P15508|SPTB1_MOUSE					1	1
AALENDKTI	9	Q9D7H2|WDR5B_MOUSE:P61965|WDR5_MOUSE	1	1	1	1	1	5
AALENDKTIKL	11	P61965|WDR5_MOUSE					1	1
AALENGYTL	9	O70343|PRGC1_MOUSE	1	1				2
AALENLFVL	9	P32299|BKRB2_MOUSE				1	1	2
AALENPMLL	9	Q9D906|ATG7_MOUSE	1					1
AALENRQTI	9	Q9WU42-2|NCOR2_MOUSE:Q9WU42|NCOR2_MOUSE	1		1			2
AALENTHLL	9	Q9D187|MIP18_MOUSE	1	1	1	1	1	5
AALINVGFL	9	Q8R087|B4GT7_MOUSE	1		1			2
AALINYTRL	9	Q8BYR5|CAPS2_MOUSE			1			1
AALIQQATTV	10	P51410|RL9_MOUSE	1					1
AALKLGQEL	9	Q9JJ28|FLII_MOUSE		1	1	1	1	4
AALKNAFSL	9	Q6PNC0|DMXL1_MOUSE:Q8BPN8|DMXL2_MOUSE	1	1				2
AALKNAFSLL	10	Q6PNC0|DMXL1_MOUSE	1	1				2
AALKNLPLI	9	Q9CZW4|ACSL3_MOUSE	1		1			2
AALLKSMLNFL	11	Q7TMY8|HUWE1_MOUSE				1	1	2
AALLNFDEF	9	Q6P9Q4|FHOD1_MOUSE	1		1			2
AALLNQQFL	9	P48453|PP2BB_MOUSE:P48455|PP2BC_MOUSE	1	1	1	1		4
AALLNTDLV	9	Q91WM3|U3IP2_MOUSE	1		1	1	1	4
AALMNIRILHI	11	Q91WG8|GLCNE_MOUSE			1			1
AALMNQQFL	9	P63328|PP2BA_MOUSE	1		1			2
AALNNHREV	9	Q8R516|MIB2_MOUSE			1			1
AALNNHVEV	9	Q80SY4|MIB1_MOUSE	1	1	1	1	1	5
AALPNIYEL	9	P49718|MCM5_MOUSE	1	1		1	1	4
AALQAANEEL	10	Q5DTN8|JKIP3_MOUSE	1					1
AALQNAVAF	9	Q80VI1|TRI56_MOUSE	1	1	1	1	1	5
AALQNKDTY	9	Q922M3|BACD3_MOUSE			1		1	2
AALQNLEEL	9	Q6NZL6|TONSL_MOUSE		1	1	1	1	4
AALQNLEQL	9	Q9WTK5|NFKB2_MOUSE	1	1	1	1	1	5
AALQNLVKI	9	P70168|IMB1_MOUSE	1	1	1	1	1	5
AALQNYNNEL	10	Q9JJ94|SSNA1_MOUSE	1	1	1	1	1	5
AALRLLTYL	9	Q8BQ33|TICRR_MOUSE	1	1	1			3
AALSGNLSHL	10	P28571|SC6A9_MOUSE			1			1
AALSNPGAKM	10	Q3UXL4|KIZ_MOUSE			1			1
AALTLLEKM	9	Q8R313|EXOC6_MOUSE	1	1	1			3
AALVNAPENRL	11	A2AJN7|S4A11_MOUSE					1	1
AALVNLDSL	9	Q8CHU3|EPN2_MOUSE	1		1			2
AALVNPDSF	9	P70121|ZHX1_MOUSE	1		1		1	3
AALVSRTFL	9	P48410|ABCD1_MOUSE	1	1	1	1	1	5
AAMADTFLEHM	11	P52480|KPYM_MOUSE	1					1
AAMFNGNYM	9	Q9CTN4|RHBT3_MOUSE					1	1
AAMKLMTAL	9	Q9D3E6|STAG1_MOUSE			1			1
AAMKNVTEL	9	P61982|1433G_MOUSE	1	1	1	1	1	5
AAMLLQQVM	9	Q8CCJ3|UFL1_MOUSE	1		1	1		3
AAMLNYTHI	9	Q8VDB2|ALG12_MOUSE	1	1	1			3
AAMTLRTVL	9	P61087|UBE2K_MOUSE			1			1
AAMVSKFFL	9	Q91WB2|PLPP7_MOUSE	1	1		1		3
AANINKESI	9	Q922B2|SYDC_MOUSE	1	1	1		1	4
AANRNHEAL	9	P15331|PERI_MOUSE		1				1
AANRNNDAL	9	P20152|VIME_MOUSE		1	1	1	1	4
AAPANPEMDNL	11	O08734|BAK_MOUSE	1					1
AAPAPFLPM	9	Q00417|TCF7_MOUSE			1			1
AAPAPSLWTL	10	Q9D7I0|SHSA5_MOUSE	1					1
AAPESFEEL	9	Q8R3N1|NOP14_MOUSE			1	1	1	3
AAPFDTVHI	9	Q8BNV1|TRM2A_MOUSE	1	1	1	1	1	5
AAPGNKTSYI	10	Q8K4F6|NSUN5_MOUSE	1	1	1		1	4
AAPINPSDI	9	Q9DCS3|MECR_MOUSE	1		1			2
AAPINPSDINM	11	Q9DCS3|MECR_MOUSE			1			1
AAPINTQGL	9	Q8BIH0|SP130_MOUSE	1	1	1	1	1	5
AAPISPWTM	9	Q3U133|ZN746_MOUSE	1	1	1	1	1	5
AAPISTTEL	9	P35991|BTK_MOUSE			1			1
AAPKSAETL	9	Q80V53|CHSTE_MOUSE	1					1
AAPMIGYPM	9	Q61656|DDX5_MOUSE					1	1
AAPPPGIVEI	10	E9Q7E2|ARID2_MOUSE	1					1
AAPQNFTPSM	10	Q9Z1T1|AP3B1_MOUSE			1			1
AAPQNFTPSMI	11	Q9Z1T1|AP3B1_MOUSE	1	1	1	1	1	5
AAPRNKHWL	9	Q56A08|GPKOW_MOUSE		1	1	1	1	4
AAPRNSPTGL	10	Q8CGI1|F193A_MOUSE	1	1	1		1	4
AAPRPPPKPM	10	P62855|RS26_MOUSE	1					1
AAPRSFIFL	9	Q3UIK4|MET14_MOUSE	1	1	1	1	1	5
AAPSAPSAGSL	11	Q8CI61|BAG4_MOUSE	1					1
AAPSNLPYL	9	Q8BFV3|DUS4_MOUSE	1	1	1	1	1	5
AAPTNANSL	9	Q8BT14|CNOT4_MOUSE	1	1	1	1	1	5
AAPTNRQIEIL	11	Q9Z0W3|NU160_MOUSE	1	1	1			3
AAPVSATVL	9	P41216|ACSL1_MOUSE	1					1
AAPVSGPRL	9	Q6NSQ7|LTV1_MOUSE	1					1
AAQTNLTLL	9	O70477|PKNX1_MOUSE:Q8BG99|PKNX2_MOUSE	1		1			2
AAVANQHSSFV	11	Q6P9P6|KIF11_MOUSE	1		1			2
AAVENLKNI	9	Q6KAR6|EXOC3_MOUSE			1			1
AAVENLPTF	9	P70168|IMB1_MOUSE			1			1
AAVENLPTFL	10	P70168|IMB1_MOUSE	1		1			2
AAVENVSEL	9	E9Q6J5|BD1L1_MOUSE	1					1
AAVGNHVAKL	10	Q8VBW6|ULA1_MOUSE	1					1
AAVIAHDFL	9	P30282|CCND3_MOUSE	1	1	1	1	1	5
AAVIDEDVL	9	Q9D787|PPIL2_MOUSE	1					1
AAVIDQERL	9	Q80UW5|MRCKG_MOUSE	1					1
AAVINKTVV	9	Q8BKT3|GCFC2_MOUSE	1					1
AAVINPPQACI	11	Q8BKZ9|ODPX_MOUSE	1					1
AAVKNEVNV	9	E9Q8I9|FRY_MOUSE	1		1			2
AAVLNPRFL	9	Q7TPS5|C2CD5_MOUSE	1	1	1	1	1	5
AAVQLIWVV	9	Q8CIM8|INT4_MOUSE:Q8CIM8-2|INT4_MOUSE	1					1
AAVQMHDVL	9	Q80YV3|TRRAP_MOUSE			1			1
AAVQNPALTAL	11	Q3U1N2|SRBP2_MOUSE	1		1		1	3
AAVRLTELL	9	Q9QUK4|BIR1B_MOUSE			1			1
AAVSNFGYDL	10	P97298|PEDF_MOUSE	1					1
AAVSNKFRDLL	11	Q8R1U1|COG4_MOUSE	1	1	1	1		4
AAVSNLVRV	9	Q64727|VINC_MOUSE	1		1		1	3
AAVVGLVCL	9	Q02053|UBA1_MOUSE	1					1
AAVVMLDRI	9	E9Q555|RN213_MOUSE				1		1
AAVVNFEEAL	10	Q9ERK4|XPO2_MOUSE	1	1	1	1		4
AAVVSVAYL	9	P49282|NRAM2_MOUSE	1					1
AAVWNAQEA	9	O08915|AIP_MOUSE	1	1	1		1	4
AAYMNKVEL	9	Q6IME9|K2C72_MOUSE	1					1
AAYRNLGQNL	10	Q8BK67|RCC2_MOUSE	1					1
ACLFNQEAL	9	Q6ZWR6-4|SYNE1_MOUSE:Q6ZWR6|SYNE1_MOUSE	1					1
ADDLDFETGD	10	P63242|IF5A1_MOUSE	1					1
ADIQTERAY	9	P62281|RS11_MOUSE	1					1
ADSFSLNDA	9	P16110|LEG3_MOUSE	1					1
ADSFSLNDAL	10	P16110|LEG3_MOUSE	1					1
ADSFSLNDALA	11	P16110|LEG3_MOUSE	1					1
AEGQVLVLD	9	P19253|RL13A_MOUSE	1					1
AETEERSLDNF	11	Q4VAA2|CDV3_MOUSE	1					1
AGHRNREVL	9	Q91W18|TDRD3_MOUSE		1	1		1	3
AGIALNDNF	9	P16858|G3P_MOUSE	1					1
AGIENDEAF	9	O08585|CLCA_MOUSE		1	1	1	1	4
AGIENKFGL	9	Q9QXX4|CMC2_MOUSE	1					1
AGIENKFGLYL	11	Q9QXX4|CMC2_MOUSE	1	1	1	1	1	5
AGIERMGLAM	10	Q9D0E1|HNRPM_MOUSE	1					1
AGILNHYLI	9	P30355|AL5AP_MOUSE	1					1
AGIYNLDDL	9	O08811|ERCC2_MOUSE			1			1
AGIYNTTEL	9	Q8K1Z0|COQ9_MOUSE		1	1	1	1	4
AGLKNLNVV	9	Q8BGW5|SOSB2_MOUSE			1			1
AGLKNLNVVFI	11	Q8BGW5|SOSB2_MOUSE			1			1
AGLLNNPHFI	10	Q8BJU0|SGTA_MOUSE	1		1	1	1	4
AGLRLLTNM	9	Q9D0L7|ARM10_MOUSE:Q9CX83|ARMX1_MOUSE:Q8BHS6|ARMX3_MOUSE	1					1
AGLRNAVSQM	10	Q6PHN1|CCD57_MOUSE					1	1
AGLTHIITM	9	Q9D0M1|KPRA_MOUSE	1					1
AGLTHLITM	9	Q8R574|KPRB_MOUSE	1					1
AGLVNIVSF	9	Q8BJL0-3|SMAL1_MOUSE:Q8BJL0-2|SMAL1_MOUSE:Q8BJL0|SMAL1_MOUSE	1					1
AGLVNVVLV	9	O70423-2|AOC3_MOUSE:O70423|AOC3_MOUSE	1					1
AGPENSSKI	9	Q80XK6|ATG2B_MOUSE	1	1	1	1	1	5
AGPSNFGTEL	10	P0C090|RC3H2_MOUSE	1	1	1	1	1	5
AGPTNRPML	9	Q07113|MPRI_MOUSE			1			1
AGPTNSLKYVP	11	Q8BMI0|FBX38_MOUSE	1					1
AGPTNVHLI	9	P70178|SIX5_MOUSE	1	1	1	1	1	5
AGRKLALKTID	11	Q9DCX2|ATP5H_MOUSE	1					1
AGTRNIYYL	9	Q9CQN1|TRAP1_MOUSE	1	1	1			3
AGVENVSEL	9	Q9WUB3|PYGM_MOUSE	1					1
AGVRNPQQHL	10	P29341|PABP1_MOUSE	1					1
AGVSNIIEF	9	Q9D2L9|F111A_MOUSE	1					1
AGVVNKYEV	9	O88455|DHCR7_MOUSE	1	1	1	1		4
AIMENANVL	9	P05064|ALDOA_MOUSE			1		1	2
AIMPNGDHI	9	P63005|LIS1_MOUSE	1					1
AISPGKHYL	9	Q2EMV9|PAR14_MOUSE	1					1
AIVANVESM	9	O35382|EXOC4_MOUSE			1			1
AIVRNLESL	9	P58064|RT06_MOUSE	1					1
AKDIGFIKLD	10	P62274|RS29_MOUSE	1					1
AKDVKFGAD	9	P63038|CH60_MOUSE	1					1
AKFMTPVIQD	10	O70194|EIF3D_MOUSE	1					1
AKHEQILVLD	10	Q9WV55|VAPA_MOUSE	1					1
AKLVNQEVL	9	Q91VD9|NDUS1_MOUSE	1	1	1	1	1	5
AKMRLLTFM	9	Q99JX4|EIF3M_MOUSE		1				1
AKVKNVDLI	9	Q8VBX0|ASB13_MOUSE		1	1			2
ALANHLIKV	9	Q9WVK4|EHD1_MOUSE:Q9QXY6|EHD3_MOUSE	1					1
ALDVANKIGII	11	P62751|RL23A_MOUSE	1					1
ALHVNGESL	9	Q5DW34|EHMT1_MOUSE			1		1	2
ALIQNADTL	9	P55194|3BP1_MOUSE	1	1	1	1	1	5
ALLQNKDVI	9	P51569|AGAL_MOUSE	1	1	1			3
ALPFRKDLGD	10	Q9JHJ0|TMOD3_MOUSE	1					1
ALPKAVVKLD	10	P08508|FCGR3_MOUSE	1					1
ALVSNLYVI	9	P61620|S61A1_MOUSE		1	1		1	3
AMADTFLEHM	10	P52480|KPYM_MOUSE	1					1
AMAPRTLLL	9	P01899|HA11_MOUSE	1					1
AMFDQSQIQEF	11	Q3THE2|ML12B_MOUSE	1					1
AMGTNDTVI	9	P19096|FAS_MOUSE			1			1
AMGVNLTSM	9	P17918|PCNA_MOUSE	1	1	1	1	1	5
AMGVNMETA	9	P62814|VATB2_MOUSE	1					1
AMLANKNASLL	11	P63013|PRRX1_MOUSE					1	1
AMLENASDI	9	Q6P542|ABCF1_MOUSE			1			1
AMLENLLSM	9	Q3V300|KIF22_MOUSE	1					1
AMLENQTPEL	10	P19096|FAS_MOUSE			1			1
AMLISAGLPPL	11	O35286|DHX15_MOUSE					1	1
AMLSLLPETL	10	Q9QY53|NPHP1_MOUSE			1			1
AMLTNLESL	9	Q8BZQ7|ANC2_MOUSE	1	1	1	1	1	5
AMMAKAEYL	9	Q99JI4|PSMD6_MOUSE	1					1
AMMVLIAHL	9	Q31125|S39A7_MOUSE		1				1
AMNIPIPFNL	10	Q9EPU0|RENT1_MOUSE	1					1
AMNSNPDTSML	11	Q52KB6|C2CD3_MOUSE					1	1
AMNVNDLFL	9	P61021|RAB5B_MOUSE	1		1			2
AMNVNEIFM	9	P35278|RAB5C_MOUSE	1	1	1	1	1	5
AMPINKATI	9	O88967|YMEL1_MOUSE	1	1	1			3
AMPRLTLPFL	10	O35678|MGLL_MOUSE	1					1
AMVINIYRM	9	O35245|PKD2_MOUSE		1				1
AMVQHPQPTPM	11	O09000|NCOA3_MOUSE					1	1
AMVSEFLKQA	10	P10107|ANXA1_MOUSE	1					1
AMYVHAYTL	9	O70435|PSA3_MOUSE	1	1	1		1	4
ANIRNMSVI	9	P58252|EF2_MOUSE			1		1	2
ANTTNLTFL	9	Q9QUK6|TLR4_MOUSE					1	1
ANVSNFTFA	9	Q9DBG6|RPN2_MOUSE			1			1
APRPPPKPM	9	P62855|RS26_MOUSE	1					1
AQFYGLTPL	9	Q6P7W2|SHKB1_MOUSE			1			1
AQHVNLAVL	9	Q9DB00|GON4L_MOUSE		1	1			2
AQIENSAAV	9	Q01514|GBP1_MOUSE		1				1
AQILNQVMM	9	O08901|BUB1_MOUSE	1		1			2
AQLAKKDYL	9	O70145|NCF2_MOUSE	1					1
AQLANTTAI	9	Q9R1C7|PR40A_MOUSE	1		1		1	3
AQLDNIHVL	9	P58196|PLS4_MOUSE					1	1
AQLDNLQEL	9	Q8R502|LRC8C_MOUSE			1			1
AQLKNLFFI	9	Q7TQP0|GP141_MOUSE				1		1
AQLLNWVYL	9	B2RVL6|ZCH24_MOUSE			1			1
AQLLNYKIAL	10	P16406|AMPE_MOUSE			1			1
AQLPNDVVL	9	O54916|REPS1_MOUSE					1	1
AQLQNQQSF	9	Q9D1L0|CHCH2_MOUSE	1		1			2
AQLRNLDNA	9	Q80VY9|DHX33_MOUSE			1			1
AQLRNLDNAVL	11	Q80VY9|DHX33_MOUSE			1			1
AQLVNLREL	9	Q5DU41|LRC8B_MOUSE				1		1
AQMELQDYV	9	P49117|NR2C2_MOUSE			1			1
AQMQNHSLEM	10	Q9JJ11|TACC3_MOUSE			1			1
AQMQNPDTL	9	Q8R317-2|UBQL1_MOUSE	1					1
AQPSNSLLGEL	11	Q9CW46|RAVR1_MOUSE	1	1	1	1	1	5
AQPVNVQQL	9	Q8CHI8|EP400_MOUSE	1	1	1		1	4
AQQVNRTTL	9	Q62311|TAF6_MOUSE			1			1
AQVENVQRI	9	Q9D5R3|CCD41_MOUSE			1			1
AQVFNLTLL	9	Q9D2E2|TOE1_MOUSE		1	1			2
AQVQNSEQL	9	Q91WG2|RABE2_MOUSE	1	1	1		1	4
AQVRNQGYL	9	Q3UXL4|KIZ_MOUSE	1	1	1			3
AQVSNVVYL	9	Q8BJE2|BTNL9_MOUSE:Q8BJE2-2|BTNL9_MOUSE	1					1
AQVTLREPL	9	Q5SQX6|CYFP2_MOUSE			1			1
AQYGNILKHVM	11	Q8R4R6|NUP53_MOUSE	1					1
AQYILMEFM	9	Q3U3D7|T131L_MOUSE			1			1
AQYRLVTEI	9	Q80Y44|DDX10_MOUSE		1	1	1		3
ASAINWTLI	9	Q8K009|AL1L2_MOUSE:Q8R0Y6|AL1L1_MOUSE	1	1		1		3
ASARNLEHL	9	Q8BMI0|FBX38_MOUSE	1		1		1	3
ASAVNFIEL	9	Q8R2G4|NAR3_MOUSE		1			1	2
ASFDKVAIPEV	11	P83741|WNK1_MOUSE	1					1
ASFFNISTL	9	Q8C147|DOCK8_MOUSE			1			1
ASFSNGPVL	9	Q5F2E7|NUFP2_MOUSE:Q5F2E7-2|NUFP2_MOUSE	1					1
ASHENPVDILI	11	Q8BIF9|ZN787_MOUSE	1					1
ASHLNLDAL	9	Q8CH72|TRI32_MOUSE	1	1	1	1	1	5
ASHVNITSNVL	11	O55112|AFF2_MOUSE					1	1
ASIANLINL	9	Q80TH2-1|ERBIN_MOUSE:Q80TH2|ERBIN_MOUSE:Q80TH2-2|ERBIN_MOUSE	1		1			2
ASIENTSTL	9	Q5SPL2|PHF12_MOUSE	1	1	1	1	1	5
ASIFNLCAI	9	P51436|DRD4_MOUSE			1			1
ASIQNGKDSL	10	Q05512|MARK2_MOUSE	1	1	1		1	4
ASIQNTVQNL	10	Q8BUH8|SENP7_MOUSE					1	1
ASIVNKDGL	9	P35396|PPARD_MOUSE	1	1	1	1	1	5
ASLHNQITA	9	Q8C754|VPS52_MOUSE			1			1
ASLKSLTYL	9	P57784|RU2A_MOUSE			1			1
ASLKSTSTL	9	Q61102|ABCB7_MOUSE					1	1
ASLLDYDTV	9	Q921M3|SF3B3_MOUSE					1	1
ASLLNKVVDSL	11	Q7TSH2|KPBB_MOUSE			1			1
ASLQLISHI	9	P27641|XRCC5_MOUSE	1	1	1			3
ASLQNFNISNL	11	P83741|WNK1_MOUSE	1					1
ASLRDKDTL	9	Q8BU30|SYIC_MOUSE			1	1	1	3
ASLSNLHSL	9	Q9D1C2|CBY1_MOUSE	1	1	1	1	1	5
ASLSNRLYI	9	E9Q3L2|PI4KA_MOUSE	1					1
ASLTNKHSQEL	11	Q80UK7|SAS6_MOUSE			1			1
ASLTNNQNL	9	F6ZDS4|TPR_MOUSE	1					1
ASLTNQDAL	9	Q9QXZ0|MACF1_MOUSE	1					1
ASLVNADKL	9	P59016|VP33B_MOUSE	1	1	1	1	1	5
ASLVNHVLL	9	Q8BHK9|ERC6L_MOUSE	1	1	1	1		4
ASLVNKIGL	9	P51163|HEM4_MOUSE			1			1
ASLVNSPSYL	10	Q3U3D7|T131L_MOUSE	1	1	1	1	1	5
ASLVSQDYV	9	Q920D3|MED28_MOUSE			1		1	2
ASMINVEYL	9	O88491|NSD1_MOUSE	1	1	1		1	4
ASMLNDELSHI	11	Q922B6|TRAF7_MOUSE			1	1		2
ASMMNLENI	9	G5E861|SCLT1_MOUSE	1					1
ASMQNVVFDYL	11	Q9CZ13|QCR1_MOUSE		1	1	1		3
ASMSNDFKSVL	11	Q8K1E0|STX5_MOUSE	1	1	1	1	1	5
ASMTNRELM	9	Q8VDL4|ADPGK_MOUSE	1	1	1	1	1	5
ASNINSVII	9	Q9CU65|ZMYM2_MOUSE			1		1	2
ASNVTNKTD	9	Q9Z204|HNRPC_MOUSE	1					1
ASPANVGTL	9	Q3UMB5|SMCR8_MOUSE	1		1		1	3
ASPEGQDYL	9	Q99LF4|RTCB_MOUSE	1	1	1	1	1	5
ASPLNPDMKM	10	Q8BZ32|ASXL2_MOUSE			1		1	2
ASPLNSLDM	9	Q3UHU5|SOGA2_MOUSE					1	1
ASPMNHSVQM	10	P45481|CBP_MOUSE			1			1
ASPMSIPTNTM	11	Q9WVG6|CARM1_MOUSE					1	1
ASPSSEMVTL	10	Q6VGS5|DAPLE_MOUSE			1	1		2
ASPSSVEVHPV	11	Q8BYK6|YTHD3_MOUSE:Q8BYK6-2|YTHD3_MOUSE:Q8BYK6-3|YTHD3_MOUSE	1					1
ASPTNLLTSLI	11	P12813|NR4A1_MOUSE			1			1
ASPTNPTAI	9	Q6PD24|AN13D_MOUSE	1					1
ASPVNRIVQM	10	Q8CH25-2|SLTM_MOUSE:Q8CH25|SLTM_MOUSE	1		1		1	3
ASQANKDLL	9	Q3URQ0|TEX10_MOUSE			1		1	2
ASTINPDHL	9	Q8BZZ3|WWP1_MOUSE			1			1
ASTTNQQEI	9	Q99JR8|SMRD2_MOUSE	1	1	1	1	1	5
ASVDNLLHL	9	Q8BWP8|B3GN1_MOUSE					1	1
ASVESASGETL	11	P29699|FETUA_MOUSE	1					1
ASVINGHTL	9	B2RXR6|ANR44_MOUSE	1	1	1	1	1	5
ASVKEWTITY	10	O88342|WDR1_MOUSE	1					1
ASVLLQDHI	9	Q91YH5|ATLA3_MOUSE				1	1	2
ASVLNKWQM	9	Q91VR5|DDX1_MOUSE	1	1	1			3
ASVLNLCEV	9	Q6ZWR6|SYNE1_MOUSE	1					1
ASVLNTDPAL	10	Q99KK7|DPP3_MOUSE	1		1		1	3
ASVLNVNHI	9	Q99NH0|ANR17_MOUSE	1	1	1	1	1	5
ASVQNEAKL	9	Q9WUM4|COR1C_MOUSE	1	1	1			3
ASVSNPLFL	9	P70428|EXT2_MOUSE	1		1	1	1	4
ASVTGAEAI	9	Q91ZV8|AGRA2_MOUSE	1					1
ASVVNLLKDVL	11	A8C756|THADA_MOUSE:A8C756-4|THADA_MOUSE	1	1	1	1		4
ASVYNTRHV	9	Q99LE2|GP146_MOUSE			1			1
ASWENPLPL	9	Q8BMI4|GEN_MOUSE					1	1
ASYEFVQRL	9	Q9JHU4|DYHC1_MOUSE	1					1
ASYINPDHL	9	Q8C863|ITCH_MOUSE					1	1
ASYRAQPSVSL	11	Q8C2Q3|RBM14_MOUSE	1					1
ASYVNLPTI	9	P14206|RSSA_MOUSE	1		1	1	1	4
ASYVNLPTIAL	11	P14206|RSSA_MOUSE		1	1	1	1	4
ATIANFSEL	9	Q9Z0E8|S22A5_MOUSE				1	1	2
ATIINEEVL	9	P14576|SRP54_MOUSE	1	1	1	1	1	5
ATILNLERV	9	Q8R1U1|COG4_MOUSE			1			1
ATISNDGATI	10	P80313|TCPH_MOUSE	1	1	1	1	1	5
ATLENNVKM	9	Q3TQB2|FXRD1_MOUSE			1			1
ATLENVTNL	9	Q8BHG2|CA123_MOUSE			1	1	1	3
ATLKNTEKI	9	P98197|AT11A_MOUSE	1		1			2
ATLQNELQSSL	11	Q9Z0U0-2|XPR1_MOUSE:Q9Z0U0|XPR1_MOUSE	1					1
ATPGRLIDFL	10	Q61656|DDX5_MOUSE	1					1
ATPYNYPVPV	10	Q9CQ91|NDUA3_MOUSE			1			1
ATVENLNEL	9	Q61056|TRPC1_MOUSE				1	1	2
ATVKNAGLI	9	P97929|BRCA2_MOUSE	1					1
ATVSNGPFL	9	Q69ZF8|MSL2_MOUSE	1	1	1	1	1	5
AVIENLKYFL	10	Q9JMG2|C1GLC_MOUSE	1	1	1	1		4
AVIQNVTGQNI	11	Q6PIJ4|NFRKB_MOUSE			1			1
AVISLEGKPL	10	P18760|COF1_MOUSE	1					1
AVLRNIVHL	9	Q8C522|ENDD1_MOUSE	1					1
AVLTNPETL	9	Q9R0E1|PLOD3_MOUSE	1	1	1	1	1	5
AVLTNQETI	9	Q3UGY8|BIG3_MOUSE	1	1	1		1	4
AVPIQSPAD	9	Q9EP89|LACTB_MOUSE	1					1
AVSNNYIQTL	10	P30999|CTND1_MOUSE	1					1
AVVLNATWL	9	P13011|ACOD2_MOUSE:Q99PL7|SCD3_MOUSE	1	1	1	1	1	5
AVVTNAMII	9	Q6P9J9|ANO6_MOUSE:Q6P9J9-2|ANO6_MOUSE	1					1
AYEGRDYIAL	10	P01899|HA11_MOUSE	1					1
CALANGEGL	9	Q99ME2|WDR6_MOUSE	1					1
CAPNNGYFMI	10	Q6GQT9|NOMO1_MOUSE	1					1
CAVIDVDVI	9	Q8BHC4|DCAKD_MOUSE	1					1
CMLTNPELL	9	Q921G8|GCP2_MOUSE	1					1
CSLQNKLVI	9	Q9CQU5|ZWINT_MOUSE	1					1
CTIVNIHEL	9	Q6RI63-2|F120B_MOUSE:Q6RI63|F120B_MOUSE	1					1
DAIHNFDFL	9	Q5XF89|AT133_MOUSE	1	1	1	1	1	5
DALENAQAI	9	Q3TL44|NLRX1_MOUSE			1			1
DALENLRVYL	10	Q9Z0H7|BCL10_MOUSE			1	1	1	3
DALSNVDLL	9	Q7TMB8-2|CYFP1_MOUSE:Q7TMB8|CYFP1_MOUSE	1	1	1		1	4
DALTNLTVL	9	Q3UM45|PP1R7_MOUSE	1	1	1	1	1	5
DAPEDRDYM	9	Q6NVF9|CPSF6_MOUSE			1			1
DAPRNLILI	9	Q8VE38|OXND1_MOUSE			1			1
DAVANLTQL	9	O88512|AP1G2_MOUSE			1		1	2
DAVKNGDYI	9	Q3TYA6|MPP8_MOUSE	1	1	1	1	1	5
DDDIAALVVD	10	P60710|ACTB_MOUSE	1					1
DGVANVEHI	9	Q9D020|5NT3A_MOUSE	1					1
DIQLTHVQT	9	O08573|LEG9_MOUSE	1					1
DPPSAKAAID	10	P56959|FUS_MOUSE	1					1
DQIQNAQYL	9	P61979-3|HNRPK_MOUSE:P61979|HNRPK_MOUSE:P61979-2|HNRPK_MOUSE	1	1	1		1	4
DQVENHEFL	9	P43247|MSH2_MOUSE			1		1	2
DSIKNLETL	9	Q6NZG4|NOXIN_MOUSE			1			1
DSLVNQEVL	9	P70700|RPA2_MOUSE	1	1	1	1	1	5
DSPGNLDTL	9	P63013|PRRX1_MOUSE					1	1
EAIKNHEEL	9	Q61112|CAB45_MOUSE			1		1	2
EAIQNSTSI	9	A2A432|CUL4B_MOUSE			1			1
EAIVNQEII	9	Q811B1|XYLT1_MOUSE				1		1
EEEIAALVID	10	P63260|ACTG_MOUSE	1					1
EETEHDYQNHI	11	P08101|FCGR2_MOUSE	1					1
EGINNLTHM	9	Q8C8U0|LIPB1_MOUSE:Q8C8U0-3|LIPB1_MOUSE:Q8C8U0-2|LIPB1_MOUSE	1					1
ELVGNLIVF	9	Q8VI47|MRP2_MOUSE	1					1
ESAISNLDYI	10	Q9R0C8|VAV3_MOUSE	1					1
ESPINVTTV	9	Q65Z40|WAPL_MOUSE	1		1		1	3
ESPLNSDVL	9	Q80UJ7|RB3GP_MOUSE			1		1	2
ETIMNQEKL	9	Q64152|BTF3_MOUSE:Q64152-2|BTF3_MOUSE	1					1
FAFANSDYL	9	Q6P5D3|DHX57_MOUSE		1	1			2
FAFESVVAI	9	Q8C147|DOCK8_MOUSE			1			1
FAFRNFLYL	9	Q6DIC0|SMCA2_MOUSE	1		1			2
FAFSNGYLASL	11	Q9JIM1|S29A1_MOUSE		1	1	1		3
FAGINQDLL	9	Q91XQ0|DYH8_MOUSE	1		1			2
FAHFNSHAA	9	Q8K2K6|AGFG1_MOUSE				1	1	2
FAHHNRYVL	9	P16879|FES_MOUSE	1					1
FAHIDGDHL	9	O35286|DHX15_MOUSE	1	1	1	1	1	5
FAHLGLDYI	9	P09838|TDT_MOUSE			1			1
FAHTNIESL	9	P27773|PDIA3_MOUSE	1	1	1	1	1	5
FAHTNIESLV	10	P27773|PDIA3_MOUSE	1					1
FAIDDHDYL	9	Q91XU3|PI42C_MOUSE	1	1	1	1	1	5
FAIINSNPIEL	11	O70472|TM131_MOUSE	1	1	1	1		4
FAIQLLNEL	9	Q8BQM9|MD12L_MOUSE			1			1
FAIQNPTLI	9	Q9D2H6|SP2_MOUSE	1	1	1	1		4
FAIRNILDYV	10	Q8CAS9|PARP9_MOUSE	1	1	1	1		4
FAISLIESV	9	Q9JHU4|DYHC1_MOUSE		1	1			2
FAIYNGEWDL	10	Q6P9N1|HYCCI_MOUSE	1		1			2
FALAMKDTL	9	Q8VHH7|ADCY3_MOUSE	1	1	1			3
FALANEHYL	9	Q8BH82|NAPEP_MOUSE	1					1
FALANHLIKV	10	Q9WVK4|EHD1_MOUSE:Q9QXY6|EHD3_MOUSE	1	1	1	1	1	5
FALELFQTL	9	Q9D154|ILEUA_MOUSE			1			1
FALINKLDI	9	Q9Z2A5-2|ATE1_MOUSE:Q9Z2A5|ATE1_MOUSE	1	1	1	1		4
FALKNPFYSL	10	Q9ES56|TPPC4_MOUSE	1	1	1	1	1	5
FALKSLTYL	9	O70281|TPST1_MOUSE		1	1			2
FALLDTEVF	9	P06800|PTPRC_MOUSE			1			1
FALNNPEMV	9	Q62433|NDRG1_MOUSE	1		1		1	3
FALRLGSWM	9	O70481|UBR1_MOUSE			1			1
FALSNEHYSL	10	Q8R4U7|LUZP1_MOUSE		1	1			2
FALSNVAEV	9	Q8CFQ3|AQR_MOUSE			1			1
FALTNPEKSI	10	Q9EPK6|SIL1_MOUSE			1			1
FALVNGNNI	9	P22892|AP1G1_MOUSE	1	1	1	1	1	5
FALYNAANL	9	E2JF22|PIEZ1_MOUSE	1		1			2
FAPKNIYSI	9	P09581|CSF1R_MOUSE	1					1
FAPKSWMEDSL	11	Q7TN98|CPEB4_MOUSE		1				1
FAPNSVHYL	9	Q99NF8|RBP17_MOUSE	1	1	1		1	4
FAPPQGSPVM	10	Q8CFE4-2|SCYL2_MOUSE:Q8CFE4|SCYL2_MOUSE	1					1
FAPQHYTEL	9	Q8BIW9|CTF18_MOUSE			1			1
FAPRDPIPYL	10	Q62376|RU17_MOUSE		1	1	1	1	4
FAPSKGSVTL	10	Q8K298|ANLN_MOUSE			1		1	2
FAPTNIILV	9	O08675|PAR3_MOUSE			1			1
FAPVNVTTE	9	P10126|EF1A1_MOUSE			1		1	2
FAPVNVTTEV	10	P10126|EF1A1_MOUSE	1	1	1	1	1	5
FAPVNVTTEVK	11	P10126|EF1A1_MOUSE	1					1
FAPYNKPSL	9	Q8R3P2-2|DTX2_MOUSE:Q8R3P2|DTX2_MOUSE:Q8R3P2-3|DTX2_MOUSE	1		1			2
FAQEALTVL	9	Q76MZ3|2AAA_MOUSE	1					1
FASFNDTFV	9	P62264|RS14_MOUSE					1	1
FATNNSEHI	9	Q6A068|CDC5L_MOUSE	1	1	1			3
FATSNQISL	9	Q8BG94|COMD7_MOUSE		1		1	1	3
FAVKNEKRFYL	11	P17047|LAMP2_MOUSE		1		1		2
FAVSNFVDNL	10	Q99K10|NLGN1_MOUSE		1				1
FAVTHQESI	9	Q5DU31|ICEF1_MOUSE		1	1			2
FAVVNHQGTL	10	Q5DU02|UBP22_MOUSE:Q8CEG8|UBP27_MOUSE	1	1	1	1	1	5
FAVVNSHSL	9	Q504N2|S22AF_MOUSE			1			1
FAYEGRDYI	9	P01899|HA11_MOUSE	1	1	1	1	1	5
FAYKNVKFVL	10	Q9DCF9|SSRG_MOUSE		1	1			2
FAYTSRHEI	9	Q99KU1|DHDDS_MOUSE			1			1
FAYTVKYVL	9	Q6P073|UB2J2_MOUSE	1					1
FCYVNDIVL	9	O09106|HDAC1_MOUSE	1					1
FFHNNMEYM	9	P03921|NU5M_MOUSE					1	1
FFIKNGDYL	9	Q8K4G5|ABLM1_MOUSE		1				1
FFLINGPEI	9	Q01853|TERA_MOUSE		1	1			2
FFPPVTNEEL	10	P29812|TYRP2_MOUSE	1					1
FGATNWDLI	9	Q8BK67|RCC2_MOUSE	1		1			2
FGGHNEDFI	9	Q8C6G8|WDR26_MOUSE			1		1	2
FGGSGTSSRP	10	P20152|VIME_MOUSE	1					1
FGGSNVHVI	9	P19096|FAS_MOUSE	1		1		1	3
FGGTKTDFL	9	Q6YGZ1|HPSE_MOUSE	1					1
FGIDNFEFI	9	P23298|KPCL_MOUSE	1		1			2
FGIHNGVETL	10	Q8C0L9|GPCP1_MOUSE	1	1	1	1	1	5
FGIKNFSAI	9	Q8BMF4|ODP2_MOUSE	1	1	1			3
FGIKNMDQV	9	P15037|ETS2_MOUSE			1			1
FGILGSTTL	9	Q6PGD0|ARAID_MOUSE			1			1
FGIRNGSRL	9	Q9Z1F9|SAE2_MOUSE			1			1
FGIRNVTHI	9	Q9CXI0|COQ5_MOUSE			1			1
FGITNLVEHPA	11	Q922U1|PRPF3_MOUSE	1					1
FGLHLIDFM	9	Q8C156|CND2_MOUSE	1	1	1	1		4
FGLKNFVDL	9	E2JF22|PIEZ1_MOUSE		1	1			2
FGLLNPVAV	9	Q61982|NOTC3_MOUSE	1					1
FGLQNFPEL	9	P70697|DCUP_MOUSE			1			1
FGLRNILSV	9	Q8VHE6|DYH5_MOUSE			1			1
FGLRNLERL	9	P58682|TLR8_MOUSE	1					1
FGLSARDLDEL	11	Q8K310|MATR3_MOUSE	1					1
FGLSNQLVV	9	Q99J21|MCLN1_MOUSE			1			1
FGLSNSAISRL	11	Q8VCC8|RPGF3_MOUSE			1			1
FGLSNYHQL	9	Q8VE37|RCC1_MOUSE			1			1
FGNVNLGYTL	10	Q64253|LY6E_MOUSE			1			1
FGPINSVAF	9	Q9QZD9|EIF3I_MOUSE	1		1			2
FGPVDHEEL	9	P49919|CDN1C_MOUSE		1	1	1	1	4
FGPVGLDKM	9	P11983|TCPA_MOUSE					1	1
FGPVNHEEL	9	P46414|CDN1B_MOUSE	1	1	1	1	1	5
FGPVSGAQIQF	11	Q7M6Y3|PICAL_MOUSE	1					1
FGVLNVQTV	9	Q9R049-2|AMFR_MOUSE:Q9R049|AMFR_MOUSE	1	1	1	1		4
FHSGTPAASF	10	Q80X50|UBP2L_MOUSE	1					1
FHVQNIDLL	9	Q4QY64|ATAD5_MOUSE	1	1	1	1	1	5
FIHNNLKDVYI	11	O89032|SPD2A_MOUSE	1					1
FIIFNKDTL	9	Q8HWB0|HMR1_MOUSE		1	1			2
FKIINHSFI	9	P00158|CYB_MOUSE		1		1	1	3
FLGASLKDEVL	11	P25444|RS2_MOUSE	1					1
FLGTGQESF	9	P07147|TYRP1_MOUSE	1					1
FLNKNQELL	9	Q920R0|ALS2_MOUSE			1			1
FLNVNCEHI	9	P49717|MCM4_MOUSE	1					1
FLVQNIHTL	9	Q9DCA5|BRX1_MOUSE		1	1	1		3
FMATNPEHL	9	Q2HXL6|EDEM3_MOUSE	1	1	1	1	1	5
FMATNSLHL	9	Q7TQK0|CCNT2_MOUSE:Q9QWV9|CCNT1_MOUSE	1		1			2
FMGVNMDVI	9	Q3TIR3|RIC8A_MOUSE	1	1				2
FMHFNLESSYL	11	P98064|MASP1_MOUSE		1				1
FMISHLDYL	9	Q62388|ATM_MOUSE	1	1	1	1	1	5
FMKQNLDEL	9	Q91WG5|AAKG2_MOUSE			1			1
FMLALKENI	9	Q9Z207|DIAP3_MOUSE	1					1
FMMVDQENI	9	Q9WVM1|RGAP1_MOUSE			1			1
FMMWNNHYI	9	Q8C1B2|PARPT_MOUSE		1				1
FMVEKGPTL	9	Q6P073|UB2J2_MOUSE	1					1
FMYTTPFTL	9	Q8C147|DOCK8_MOUSE		1	1			2
FNLENVTVF	9	Q8R3N6|THOC1_MOUSE			1			1
FNLVNNALL	9	O35841|API5_MOUSE			1			1
FQAINAGHI	9	Q0VGY8|TANC1_MOUSE:Q0VGY8-2|TANC1_MOUSE	1	1	1			3
FQALNAEKL	9	Q9JKK8|ATR_MOUSE			1			1
FQEMNIELI	9	Q9Z2N8|ACL6A_MOUSE			1	1		2
FQFANNKPEI	10	P11531|DMD_MOUSE				1		1
FQFINPTTI	9	Q8C0M0-2|WDR59_MOUSE:Q8C0M0|WDR59_MOUSE:Q8C0M0-3|WDR59_MOUSE	1	1	1	1	1	5
FQFLHSAYATL	11	Q8BGZ2|F168A_MOUSE		1				1
FQFPDVDFL	9	Q06890|CLUS_MOUSE	1					1
FQFVGIENI	9	Q8VE11|MTMR6_MOUSE			1			1
FQGKNLETV	9	B2RXS4|PLXB2_MOUSE	1					1
FQGTSLTHL	9	Q8BMT4-2|NRROS_MOUSE:Q8BMT4|NRROS_MOUSE:Q8BMT4-3|NRROS_MOUSE	1		1			2
FQHPNTDML	9	Q63918|CAVN2_MOUSE	1	1			1	3
FQIVNPHLL	9	P07742|RIR1_MOUSE	1	1	1	1	1	5
FQLENFTLKV	10	Q9CPN8|IF2B3_MOUSE			1	1		2
FQLINVEDF	9	Q8CFQ3|AQR_MOUSE	1		1	1		3
FQLQNPFLL	9	Q3U564-2|DCP1B_MOUSE:Q3U564|DCP1B_MOUSE	1	1	1			3
FQLRLAEVL	9	Q8R5K4|NOL6_MOUSE	1					1
FQLRSFDQL	9	Q61221|HIF1A_MOUSE			1			1
FQLSLLAAM	9	Q9JIF7|COPB_MOUSE			1			1
FQNVNSVTL	9	Q8CDN6|TXNL1_MOUSE	1	1	1	1	1	5
FQVENFFTL	9	Q3TLI0|TPC10_MOUSE			1			1
FQVKNPPAAYI	11	Q9JL26|FMNL_MOUSE			1			1
FQVKNPPHTYI	11	A2APV2-2|FMNL2_MOUSE:A2APV2|FMNL2_MOUSE:A2APV2-3|FMNL2_MOUSE	1	1	1			3
FQVLNAIENL	10	Q8BH02|TOR4A_MOUSE			1			1
FQVTHTVAL	9	Q9QYA2|TOM40_MOUSE	1					1
FQWRNLNTI	9	Q8BIR2|ASTE1_MOUSE	1	1	1			3
FQYENFFSYV	10	Q8K2A7|INT10_MOUSE			1			1
FQYESKVFYL	10	P68510|1433F_MOUSE	1					1
FQYGPAVFPVA	11	Q80X50|UBP2L_MOUSE	1					1
FSATFPKEIQM	11	Q62167|DDX3X_MOUSE	1					1
FSEENHEPL	9	Q9EQH3|VPS35_MOUSE	1	1	1	1	1	5
FSEKNTDHI	9	Q8CG50|RAB43_MOUSE			1			1
FSFKMISYM	9	Q5H8C4|VP13A_MOUSE			1			1
FSFQNFIEI	9	P14873|MAP1B_MOUSE		1				1
FSFRNTQEVI	10	Q80SU7|GVIN1_MOUSE	1		1			2
FSFSNRKLL	9	Q9WTU0|PHF2_MOUSE					1	1
FSGANKEKL	9	P10639|THIO_MOUSE			1			1
FSGHNLEYL	9	Q8R3J5|CHAC1_MOUSE	1	1	1	1	1	5
FSGSNAEQM	9	Q60875|ARHG2_MOUSE		1	1			2
FSGTDRETL	9	Q8VI59|PCX3_MOUSE			1		1	2
FSHEGPAFL	9	P07147|TYRP1_MOUSE	1					1
FSHHNIIRL	9	Q03145|EPHA2_MOUSE					1	1
FSHPNVLPVL	10	O55222|ILK_MOUSE	1	1	1	1	1	5
FSIALHFPG	9	Q60696|PMEL_MOUSE	1					1
FSIFNRSIDAF	11	P20826|SCF_MOUSE				1	1	2
FSIKNKKGSEL	11	P26041|MOES_MOUSE		1	1	1	1	4
FSIQNYTEKL	10	O54732|MMP15_MOUSE				1		1
FSISSALAM	9	Q9D154|ILEUA_MOUSE			1			1
FSITDQQTL	9	C3VPR6|NLRC5_MOUSE	1	1	1		1	4
FSKKNFESL	9	Q9DBG6|RPN2_MOUSE			1			1
FSKVNIQVL	9	Q9Z2F2|OASL2_MOUSE	1	1				2
FSLAHITQL	9	Q01730|RSU1_MOUSE			1		1	2
FSLDNSSSHL	10	Q8BYN5|FSD1L_MOUSE	1					1
FSLENITRM	9	Q3V1D5|PLPL1_MOUSE		1			1	2
FSLENLRTM	9	Q80TG1|KANL1_MOUSE		1			1	2
FSLENNFLL	9	P42225|STAT1_MOUSE		1	1			2
FSLENVPEGEL	11	Q6A037|N4BP1_MOUSE			1	1		2
FSLGNLEQF	9	Q3U182|CRTC2_MOUSE			1			1
FSLHNPYNL	9	O70306|TBX15_MOUSE		1			1	2
FSLINGDDM	9	Q99J21|MCLN1_MOUSE		1				1
FSLINWDDL	9	Q9WVC6|SGK1_MOUSE	1					1
FSLQNQLRL	9	Q9JJ28|FLII_MOUSE	1	1	1			3
FSLSNLQEL	9	Q8BGR2|LRC8D_MOUSE			1	1		2
FSLTNGMYP	9	P47911|RL6_MOUSE	1	1	1	1	1	5
FSLVGFTQM	9	Q9CY27|TECR_MOUSE	1	1	1	1		4
FSMQDLTTI	9	Q8BGH4|REEP1_MOUSE			1			1
FSMTLFQHI	9	Q8BJU2|TSN9_MOUSE		1				1
FSNKNLEEL	9	Q8C0S1-2|DI3L1_MOUSE:Q8C0S1|DI3L1_MOUSE	1	1	1			3
FSNLFGGEPL	10	Q62351|TFR1_MOUSE		1		1	1	3
FSNVNLKEV	9	Q3U1J4|DDB1_MOUSE	1	1	1	1	1	5
FSNVNSIEF	9	Q61735|CD47_MOUSE		1				1
FSPANYDQAHL	11	Q6P4S6|SIK3_MOUSE		1	1			2
FSPENTELL	9	Q8C1Z7|BBS4_MOUSE		1	1	1	1	4
FSPENYKDHSM	11	Q3UZ18|NARG2_MOUSE					1	1
FSPFNPTSL	9	Q9Z2U4|ELF4_MOUSE	1		1			2
FSPFNPTSLI	10	Q9Z2U4|ELF4_MOUSE			1			1
FSPINWDDL	9	Q9QZS5|SGK2_MOUSE		1				1
FSPLNPMRVHI	11	P70333|HNRH2_MOUSE	1	1	1			3
FSPLNPVRV	9	Q9Z2X1|HNRPF_MOUSE	1	1	1	1	1	5
FSPLNPVRVHI	11	Q9Z2X1|HNRPF_MOUSE	1	1	1	1		4
FSPPTLPGNFL	11	Q8C570|RAE1L_MOUSE	1					1
FSPTNPAHL	9	A6PWY4-2|WDR76_MOUSE:A6PWY4|WDR76_MOUSE	1	1	1			3
FSPTNPAHLL	10	A6PWY4|WDR76_MOUSE	1	1	1	1	1	5
FSPTNYHFL	9	Q8K2I4|MANBA_MOUSE		1	1			2
FSPVSIATA	9	Q00897|A1AT4_MOUSE:P22599|A1AT2_MOUSE:Q00898|A1AT5_MOUSE	1					1
FSPVSIATAFA	11	Q00897|A1AT4_MOUSE:P22599|A1AT2_MOUSE:Q00898|A1AT5_MOUSE	1					1
FSQENTEKI	9	Q8CIG0|DEP1A_MOUSE	1		1	1		3
FSTWNLDHI	9	O54788|DFFB_MOUSE			1			1
FSVEGQENL	9	Q9DBC3|CMTR1_MOUSE	1					1
FSVENKWRL	9	P17665|COX7C_MOUSE	1	1	1	1	1	5
FSVENKWRLL	10	P17665|COX7C_MOUSE		1	1	1		3
FSVLNWDQV	9	Q5SSF7|TET5C_MOUSE	1					1
FSVQNEAGL	9	Q9Z2U2|ZN292_MOUSE			1			1
FSVTNPHPEI	10	A2AF47|DOC11_MOUSE			1			1
FSVTNPHTM	9	Q8CDD9|LRIF1_MOUSE	1	1	1			3
FSYKIDFAEM	10	Q8CFF0|PAR11_MOUSE	1					1
FSYLNPQEL	9	Q8C2S5|FBXL5_MOUSE	1	1	1	1	1	5
FSYMGPSQRPL	11	Q04888|SOX10_MOUSE	1					1
FTAQVIILNHP	11	P10126|EF1A1_MOUSE	1					1
FTFVLRDLL	9	O35664|INAR2_MOUSE			1			1
FTGILQLLQ	9	Q7TPD0|INT3_MOUSE	1					1
FTIENKTPQ	9	Q78PY7|SND1_MOUSE	1					1
FTIFNRVDI	9	O35638|STAG2_MOUSE			1			1
FTILNPIYSI	10	Q8R081|HNRPL_MOUSE			1			1
FTIRNKKGTEL	11	P46662|MERL_MOUSE		1		1	1	3
FTITDQVPF	9	Q60696|PMEL_MOUSE	1					1
FTLANVKEL	9	Q9Z179|SHCBP_MOUSE	1		1			2
FTLVGSHTL	9	Q8K298|ANLN_MOUSE					1	1
FTLVNKKNALI	11	Q99MS7|EH1L1_MOUSE					1	1
FTVENVKEL	9	Q09LZ8|CBPC6_MOUSE			1	1		2
FTVSNFVDNL	10	Q69ZK9|NLGN2_MOUSE	1	1	1	1	1	5
FTVTNTDCL	9	O54956|DPOE2_MOUSE	1					1
FTYINLDKV	9	Q62351|TFR1_MOUSE		1				1
FTYMNPAQRPM	11	Q04887|SOX9_MOUSE					1	1
FVDGLMIHSGD	11	P62908|RS3_MOUSE	1					1
FVEGLRVFD	9	P05977|MYL1_MOUSE:P09541|MYL4_MOUSE	1					1
FVHENIETF	9	B1AZA5|TM245_MOUSE		1			1	2
FVIFNNTYI	9	Q8VBW6|ULA1_MOUSE	1	1	1			3
FVIRNIVEA	9	P62855|RS26_MOUSE	1	1	1	1	1	5
FVIRNIVEAAA	11	P62855|RS26_MOUSE	1					1
FVISNYREQL	10	Q3UJC8|CE034_MOUSE	1					1
FVKLISWYDNE	11	P16858|G3P_MOUSE	1					1
FVLENFSTL	9	Q6PCX9|TRI37_MOUSE			1			1
FVLVLYDEI	9	P48962|ADT1_MOUSE			1			1
FVRINQDYI	9	Q497V5-2|SRBD1_MOUSE:Q497V5|SRBD1_MOUSE	1	1	1		1	4
FVTWHRYHL	9	P29812|TYRP2_MOUSE	1					1
FYFALRDTL	9	Q8CG47|SMC4_MOUSE		1	1			2
GAIENAFHL	9	Q149T7|PPM1J_MOUSE	1					1
GAIFNGLTL	9	O70622|RTN2_MOUSE			1			1
GAIGNPEVL	9	Q99LN9|DOHH_MOUSE					1	1
GAIRNAAFL	9	Q8C5G2|VASH2_MOUSE	1					1
GAIRNGGLYV	10	Q80V03-2|ADCK5_MOUSE:Q80V03|ADCK5_MOUSE	1			1	1	3
GAISNFEEF	9	P70669|PHEX_MOUSE				1	1	2
GAIVDQMTL	9	O09159|MA2B1_MOUSE	1					1
GAIVNGKVL	9	Q6GYP7|RGPA1_MOUSE	1	1	1	1	1	5
GALENAKAEI	10	Q9DBS8|POC5_MOUSE		1	1	1		3
GALGNTPPFL	10	Q8BYK6|YTHD3_MOUSE					1	1
GALKNIVAV	9	Q3ULJ0-2|GPD1L_MOUSE:P13707|GPDA_MOUSE:Q3ULJ0|GPD1L_MOUSE	1	1	1	1	1	5
GALKNLSVI	9	F2Z461|HERC6_MOUSE	1	1	1	1		4
GALKNLSVIYI	11	F2Z461|HERC6_MOUSE	1	1	1	1	1	5
GALKNTDYF	9	Q9D020-1|5NT3A_MOUSE:Q9D020|5NT3A_MOUSE	1	1	1	1	1	5
GALRSREFL	9	Q8BUH7|RNF26_MOUSE			1			1
GALVNAIFL	9	Q60738|ZNT1_MOUSE	1		1			2
GALVNLSNAHL	11	Q9DBD5|PELP1_MOUSE			1			1
GANVNHTTV	9	Q9Z2G0|FEM1B_MOUSE	1	1	1	1	1	5
GAPENSGISTL	11	F8VPU2|FARP1_MOUSE	1					1
GAPGNSEQDFM	11	Q8R5A3|AB1IP_MOUSE			1			1
GAPGPLGPPG	10	Q63870|CO7A1_MOUSE	1					1
GAPINKYVV	9	Q8BX90|FND3A_MOUSE	1				1	2
GAPINVMFL	9	P58242|ASM3B_MOUSE	1	1				2
GAPLNIHKV	9	Q80XQ2|TBCD5_MOUSE			1			1
GAPLNLVDL	9	Q9QWT9|KIFC1_MOUSE	1	1	1	1	1	5
GAPRSSQFL	9	Q9Z2X8|KEAP1_MOUSE					1	1
GAPSNPDVF	9	Q9JI75|NQO2_MOUSE	1				1	2
GAVENPEYL	9	P70424|ERBB2_MOUSE	1			1	1	3
GAVFNGITL	9	Q9ES97|RTN3_MOUSE	1		1			2
GAVHNIESL	9	Q9CZP5|BCS1_MOUSE			1			1
GAVKNAQEAL	10	Q9CRT8|XPOT_MOUSE			1			1
GAVKNLTYF	9	Q91Y74|SIA4C_MOUSE	1	1	1	1	1	5
GAVLNDPYM	9	O88196|TTC3_MOUSE	1	1	1		1	4
GAVQNIAHL	9	Q9DBR3|ARMC8_MOUSE			1			1
GAVTLQEYL	9	Q68FF6|GIT1_MOUSE	1				1	2
GAVTNVKVI	9	Q60899|ELAV2_MOUSE:P70372|ELAV1_MOUSE:Q60900|ELAV3_MOUSE	1	1	1	1	1	5
GAVVNVADL	9	Q3UES3|TNKS2_MOUSE	1					1
GAVYNLENVLL	11	Q6A009|LTN1_MOUSE			1			1
GCISNTASYL	10	Q9Z1G4|VPP1_MOUSE:P15920|VPP2_MOUSE:Q920R6|VPP4_MOUSE	1					1
GDQALSFLKD	10	P48962|ADT1_MOUSE	1					1
GESDDSILRLA	11	Q9CQR2|RS21_MOUSE	1					1
GGIQNVGHI	9	P24547|IMDH2_MOUSE	1	1	1	1	1	5
GGLRNVDCL	9	Q9WUN2|TBK1_MOUSE	1					1
GGNFGGRSSGP	11	P49312|ROA1_MOUSE	1					1
GGNINVETI	9	O54734|OST48_MOUSE	1		1	1	1	4
GGNYNDFGNY	10	Q8BG05|ROA3_MOUSE	1					1
GGPANLEAI	9	Q9D9V3|ECHD1_MOUSE			1			1
GGPENVAEM	9	Q689Z5|SBNO1_MOUSE	1	1	1	1	1	5
GGQVSLRVIND	11	Q60696|PMEL_MOUSE	1					1
GGRVQAVLTSD	11	Q99P91|GPNMB_MOUSE	1					1
GGVGFGGLEAM	11	Q8C854|MYEF2_MOUSE:Q8C854-1|MYEF2_MOUSE:Q8C854-2|MYEF2_MOUSE	1					1
GGVRNGVAL	9	Q8BJW5-2|NOL11_MOUSE	1	1	1	1	1	5
GGVVNMYHM	9	P28063|PSB8_MOUSE	1	1	1		1	4
GGVVNPNEV	9	P34056-2|AP2A_MOUSE:P34056-3|AP2A_MOUSE:P34056|AP2A_MOUSE:P34056-4|AP2A_MOUSE	1					1
GIFPQDFSI	9	Q61245|COBA1_MOUSE	1					1
GIVTNWDDM	9	P60710|ACTB_MOUSE:P63260|ACTG_MOUSE	1					1
GKGEQGPAGPP	11	Q01149|CO1A2_MOUSE	1					1
GKLLNAEYI	9	Q8BL65|ABLM2_MOUSE	1					1
GKTELTPAYF	10	Q8BVI4|DHPR_MOUSE	1					1
GLEPQPVAL	9	Q9EPN1-3|NBEA_MOUSE:Q9EPN1-4|NBEA_MOUSE:Q9EPN1|NBEA_MOUSE	1					1
GLQKAVVNLD	10	A0A0B4J1G0|FCGR4_MOUSE	1					1
GMAVLIDFL	9	O35604|NPC1_MOUSE			1			1
GMGFGLERM	9	Q9D0E1|HNRPM_MOUSE	1					1
GMHQNTLRI	9	Q99L48|NMD3_MOUSE			1			1
GMIENGPFL	9	Q80SU7|GVIN1_MOUSE	1					1
GMIINVLEL	9	Q8BHL8|PSMF1_MOUSE	1	1	1	1		4
GMKLNLDYL	9	Q9QXB9|DRG2_MOUSE	1	1	1	1	1	5
GNFGGRSSGP	10	P49312|ROA1_MOUSE	1					1
GNVTNITTV	9	Q8BMT4|NRROS_MOUSE	1		1			2
GPMKSGNFGGS	11	O88569|ROA2_MOUSE	1					1
GPVEEVKELQ	10	P18242|CATD_MOUSE	1					1
GQAQNKVYL	9	A2AWP8|ARGAL_MOUSE	1					1
GQGRNPFFL	9	Q8BND4|INT6L_MOUSE	1					1
GQHENIVNL	9	P09581|CSF1R_MOUSE	1					1
GQHPNIITL	9	P18653|KS6A1_MOUSE			1		1	2
GQITNFEYL	9	P97412|LYST_MOUSE	1	1	1	1	1	5
GQLANFQEM	9	Q9DBT5|AMPD2_MOUSE	1					1
GQLENAEQL	9	Q8CC21|TTC19_MOUSE	1	1	1		1	4
GQLPNLDLL	9	Q9WTK3|GPAA1_MOUSE		1		1		2
GQLPNLQTV	9	O70494|SP3_MOUSE					1	1
GQLSNGDHHF	10	P59326|YTHD1_MOUSE	1					1
GQLSNGDHHFM	11	P59326|YTHD1_MOUSE	1		1		1	3
GQMSNGEHHYI	11	Q8BYK6|YTHD3_MOUSE					1	1
GQVINLDQL	9	Q3UVG3|F91A1_MOUSE	1	1	1	1	1	5
GQVSLRVIND	10	Q60696|PMEL_MOUSE	1					1
GQVVIIHML	9	Q9Z1T1|AP3B1_MOUSE	1					1
GRVQAVLTSD	10	Q99P91|GPNMB_MOUSE	1					1
GSGTNVCEL	9	Q9CQI4|CK074_MOUSE	1					1
GSHTNIHLL	9	Q9Z103|ADNP_MOUSE	1	1	1		1	4
GSIANFTNV	9	Q91V92|ACLY_MOUSE	1					1
GSIANLTEL	9	Q99NH0|ANR17_MOUSE			1			1
GSIINISSI	9	P50171|DHB8_MOUSE			1			1
GSIINYMVVM	10	Q3UVK0|ERMP1_MOUSE		1	1			2
GSIVNEGYL	9	O55100|SNG1_MOUSE	1	1	1			3
GSIYNPEVL	9	P14869|RLA0_MOUSE					1	1
GSLANHTSI	9	Q9D2N9|VP33A_MOUSE	1	1	1		1	4
GSLKNVTTL	9	Q80TH2|ERBIN_MOUSE	1	1	1	1	1	5
GSLLNQPKAVL	11	Q80YR7|CLSPN_MOUSE			1		1	2
GSLLSDDFL	9	Q8BHE3|ATCAY_MOUSE		1		1	1	3
GSLRNLEEL	9	Q9JIB3|BIR1G_MOUSE:Q9QWK5|BIR1A_MOUSE:Q9R016|BIR1E_MOUSE:Q9JIB6|BIR1F_MOUSE	1		1			2
GSLRNVLSL	9	O70579|PM34_MOUSE			1			1
GSLSNHTEL	9	Q6NZL6|TONSL_MOUSE	1	1	1	1	1	5
GSLSNSVFL	9	Q7TN22-2|TXD16_MOUSE:Q7TN22|TXD16_MOUSE	1					1
GSLTNLHTL	9	Q03172|ZEP1_MOUSE	1				1	2
GSLVHISYL	9	P08775|RPB1_MOUSE	1					1
GSLVNQNLL	9	Q9WVH4|FOXO3_MOUSE			1		1	2
GSPANTRYL	9	P63328|PP2BA_MOUSE			1			1
GSPENEEYI	9	Q8K4Q0|RPTOR_MOUSE			1			1
GSPENLGESTL	11	Q6DFV7|NCOA7_MOUSE					1	1
GSPMNTTQL	9	Q9EST8|IKBZ_MOUSE:Q9EST8-2|IKBZ_MOUSE	1		1			2
GSPTNLDKI	9	P21952|PO3F1_MOUSE	1					1
GSPTSYFTSGL	11	Q9CW46|RAVR1_MOUSE	1					1
GSPVNGSSQL	10	Q8R2U0|SEH1_MOUSE					1	1
GSVANKFYV	9	P97855|G3BP1_MOUSE	1	1	1			3
GSVINEVVL	9	Q9ER38|TOR3A_MOUSE			1			1
GSVLNASTV	9	O08848|RO60_MOUSE	1					1
GSVPNKFYV	9	P97379|G3BP2_MOUSE			1		1	2
GSVSNIYKL	9	Q7TMB8|CYFP1_MOUSE		1	1		1	3
GSVTNVSVL	9	Q8CIQ7|DOCK3_MOUSE	1					1
GSVVNSVAL	9	P59326|YTHD1_MOUSE	1	1	1	1	1	5
GTFVNTELI	9	Q9Z265|CHK2_MOUSE			1			1
GTLTDCVVMRD	11	Q8BG05|ROA3_MOUSE:P49312|ROA1_MOUSE	1					1
GVCTNIIHM	9	Q99LE6|ABCF2_MOUSE	1					1
GVHVNQELL	9	Q0P5W1|VPS8_MOUSE		1	1	1	1	4
GVIILYDHV	9	Q921M7|CYRIB_MOUSE:Q8BHZ0|CYRIA_MOUSE	1					1
GVQVETISPGD	11	P26883|FKB1A_MOUSE	1					1
GVRNPQQHL	9	P29341|PABP1_MOUSE	1					1
GYEPPVQESV	10	P97351|RS3A_MOUSE	1					1
HAIENIDTF	9	P97929|BRCA2_MOUSE	1	1	1	1	1	5
HAIRNSFQYL	10	Q91XS1|MTMR4_MOUSE	1	1	1			3
HAISNYYDNHL	11	Q8VEG4|EXD2_MOUSE		1	1	1	1	4
HALDNGLFTL	10	P97376|FRG1_MOUSE			1			1
HALQNYSQAVM	11	Q80XJ3|TTC28_MOUSE			1			1
HALTNAIQDSL	11	Q9Z1Q9|SYVC_MOUSE			1			1
HGMLNAEAL	9	P70166|CPEB1_MOUSE			1			1
HGVLNTDNM	9	Q9DBC0|SELO_MOUSE		1	1		1	3
HILANADAI	9	Q61333|TNAP2_MOUSE	1					1
HLVTNQEAL	9	Q8CFB4|GBP5_MOUSE	1					1
HMLNNPDIM	9	Q8R317|UBQL1_MOUSE			1			1
HQLENLSNFI	10	Q08093|CNN2_MOUSE			1			1
HQLQNFNTL	9	Q8BTM9-4|GRP4_MOUSE:Q8BTM9-3|GRP4_MOUSE:Q8BTM9|GRP4_MOUSE:Q8BTM9-2|GRP4_MOUSE:Q9Z1S3|GRP1_MOUSE	1		1			2
HQMQLVDSI	9	F6ZDS4|TPR_MOUSE	1					1
HQVKNHMWI	9	Q01320|TOP2A_MOUSE		1				1
HSHLLKTPL	9	Q9CW46|RAVR1_MOUSE	1					1
HSILNSSYA	9	P83887|TBG1_MOUSE			1			1
HSIQNSQDM	9	Q91YN9|BAG2_MOUSE		1	1		1	3
HSLESSLIDIM	11	Q7TN98|CPEB4_MOUSE	1					1
HSLINPEVF	9	Q6ZQ08|CNOT1_MOUSE:Q6ZQ08-2|CNOT1_MOUSE:Q6ZQ08-4|CNOT1_MOUSE	1		1		1	3
HSLLNKATV	9	Q04690|NF1_MOUSE			1			1
HSPTNTVHM	9	Q80U87|UBP8_MOUSE		1	1			2
HSVINSSDI	9	Q8C9M2|CCD15_MOUSE			1			1
HSVLNLLFL	9	Q9CYC3|TM39A_MOUSE			1			1
HSVQNTEYF	9	O88700|BLM_MOUSE	1	1	1		1	4
HTGSNHTYL	9	Q9WU40|MAN1_MOUSE			1		1	2
HTVNNHAFL	9	P40694|SMBP2_MOUSE			1			1
HTVQNADQV	9	P36371|TAP2_MOUSE		1	1			2
IAARNQENL	9	Q8K207|CA021_MOUSE			1			1
IAIGNPVHL	9	Q9JJN2|ZFHX4_MOUSE	1				1	2
IAIKLAEYL	9	Q99KE1|MAOM_MOUSE			1			1
IAISNYRLHI	10	Q91XS1|MTMR4_MOUSE		1				1
IALFNQELV	9	Q62141|SIN3B_MOUSE	1		1	1	1	4
IALHNIDSV	9	Q80X82|SYMPK_MOUSE	1	1	1		1	4
IALINALFL	9	Q8BHL5|ELMO2_MOUSE	1	1				2
IALLNSKAL	9	Q3T9E4|TGTP2_MOUSE:Q62293|TGTP1_MOUSE	1					1
IALRNQATM	9	Q80UP3|DGKZ_MOUSE			1			1
IANINQELI	9	Q8BMI0|FBX38_MOUSE	1	1	1	1	1	5
IAPEDQVVL	9	P35545|UBIM_MOUSE	1					1
IAPFNFPAMI	10	Q9EQ20|MMSA_MOUSE		1				1
IAPKNPTISL	10	Q923U0|TM1L1_MOUSE		1			1	2
IAPRSFWMTL	10	Q8R480|NUP85_MOUSE		1	1			2
IAPSNQVIM	9	Q61398|PCOC1_MOUSE	1					1
IAPTNAEVL	9	Q80U28|MADD_MOUSE			1			1
IAVANAQEL	9	P62075|TIM13_MOUSE	1	1	1	1	1	5
IAVANAQELL	10	P62075|TIM13_MOUSE	1		1		1	3
IAVANATTM	9	Q3UA37|QRIC1_MOUSE	1					1
IAVINALFL	9	Q8BPU7|ELMO1_MOUSE			1			1
IAVINVTGI	9	Q8K0H1|S47A1_MOUSE				1		1
IAVQNNQQL	9	Q7TQK1|INT7_MOUSE	1		1			2
IGFVNLDHI	9	Q9ERB5|SO1C1_MOUSE			1			1
IGIANFAEQI	10	Q9Z2X8|KEAP1_MOUSE	1		1		1	3
IGIENIHYL	9	Q9DB27|MCTS1_MOUSE:Q9CQ21|MCTS2_MOUSE	1	1	1	1		4
IGIQNFPEGL	10	Q8BWY7|S39AB_MOUSE	1					1
IGISNYPESTI	11	P70399|TP53B_MOUSE			1		1	2
IGITNHDEYSL	11	P26039|TLN1_MOUSE	1				1	2
IGLGNLTLI	9	Q80SU7|GVIN1_MOUSE	1					1
IGLQNGVLL	9	Q921M3|SF3B3_MOUSE	1		1			2
IGLSNTNAL	9	Q8CIG0|DEP1A_MOUSE					1	1
IGPKNYEFL	9	Q8BHY8|SNX14_MOUSE	1	1	1	1	1	5
IGPNNGKNFF	10	Q8K203|NEIL3_MOUSE	1					1
IGVRNENTFL	10	Q91ZJ5|UGPA_MOUSE		1	1			2
IIDAPALALA	10	B2RQC6-2|PYR1_MOUSE:B2RQC6|PYR1_MOUSE	1					1
IIGINGDYF	9	P11983|TCPA_MOUSE	1					1
IINENYDYL	9	Q6PFD9|NUP98_MOUSE	1					1
IKNENQEVI	9	Q922S4|PDE2A_MOUSE	1					1
ILHTNLVYL	9	Q62280|SSXT_MOUSE	1	1	1	1	1	5
IMATNRIETL	10	P62192|PRS4_MOUSE			1			1
IMFETFNTPAM	11	P60710|ACTB_MOUSE:P63260|ACTG_MOUSE	1					1
IMGQNVADYM	10	P47962|RL5_MOUSE			1		1	2
IMVRNIDLV	9	P70280|VAMP7_MOUSE	1		1			2
INIFNKDYI	9	Q8BUH8|SENP7_MOUSE			1			1
INITNGEEV	9	Q8BK63|KC1A_MOUSE					1	1
INVPNAEVL	9	P70398|USP9X_MOUSE	1					1
IQAENAEFM	9	P14901|HMOX1_MOUSE	1	1	1	1	1	5
IQGILIEHL	9	Q91ZX7|LRP1_MOUSE	1					1
IQHSNIVTL	9	Q640Q5|PAN3_MOUSE			1			1
IQIANVTTL	9	Q9CU65|ZMYM2_MOUSE	1		1		1	3
IQIGNHNYM	9	Q60855|RIPK1_MOUSE			1		1	2
IQKTPQIQVY	10	P01887|B2MG_MOUSE	1					1
IQLMNTAHL	9	Q9DC50|OCTC_MOUSE	1	1	1		1	4
IQLSNQEFL	9	E9Q309|CE350_MOUSE	1					1
IQPINHTTL	9	Q8CEF1|FEM1C_MOUSE	1		1			2
IQVKNEVSL	9	P51912|AAAT_MOUSE	1	1	1		1	4
IQVPNCDEI	9	Q8CIE6|COPA_MOUSE	1					1
IQVTNLISDSL	11	Q8BI71|EX3L1_MOUSE	1		1			2
IQWPNGITL	9	P35951|LDLR_MOUSE		1	1			2
IQYINSYYI	9	Q6ZQ93|UBP34_MOUSE			1			1
ISGVNGTHI	9	O70551|SRPK1_MOUSE	1	1	1		1	4
ISGVNRYYV	9	O35683|NDUA1_MOUSE			1			1
ISGWNGDNM	9	P10126|EF1A1_MOUSE	1					1
ISIANSNAI	9	Q9QY24|ZBP1_MOUSE	1	1				2
ISIMNGSSV	9	Q91W45|PAI2B_MOUSE			1		1	2
ISIPGKDPDSP	11	Q99P91|GPNMB_MOUSE	1					1
ISLENPGTSPA	11	Q62469|ITA2_MOUSE			1	1		2
ISLKNSQEI	9	Q80SU7|GVIN1_MOUSE	1					1
ISLLNAIDAL	10	O35177|CASL_MOUSE	1		1			2
ISLLNYEDGVL	11	Q8C878|UBA3_MOUSE		1	1	1		3
ISPANIASFSL	11	Q3TYD6|LMTK2_MOUSE		1				1
ISPCNSPTAL	10	Q8CI11|GNL3_MOUSE	1					1
ISPENHISL	9	Q9WTX2|PRKRA_MOUSE	1	1	1	1	1	5
ISPFNFTAI	9	Q8CHT0|AL4A1_MOUSE	1	1	1	1		4
ISPFNKSAL	9	Q8BRT1|CLAP2_MOUSE			1			1
ISPKHFVHL	9	Q9JL60|GMEB1_MOUSE	1					1
ISPNNRNAI	9	O54785|LIMK2_MOUSE			1			1
ISPQNATHI	9	P97479|MYO7A_MOUSE	1	1				2
ISPQNGRYQI	10	Q07174|M3K8_MOUSE			1			1
ISPQNMDIL	9	Q9QWR8|NAGAB_MOUSE	1	1			1	3
ISPSNCIYM	9	Q921X6|RPC6_MOUSE	1					1
ISPTHPGEGL	10	Q9JK38|GNA1_MOUSE	1					1
ISPVNPVAI	9	Q91WT8|RBM47_MOUSE	1		1		1	3
ISWHNIDYI	9	Q8C170|MYO9A_MOUSE		1	1			2
ITGTNAEVM	9	P15105|GLNA_MOUSE	1					1
ITLTSANHAMI	11	P16110|LEG3_MOUSE	1					1
ITPLNKDHI	9	Q99P88|NU155_MOUSE		1	1		1	3
IVGINLTEM	9	Q8BGF6|ELMD2_MOUSE	1	1	1	1	1	5
IVHEPGPVM	9	Q64267|XPA_MOUSE	1					1
IVSQVVYYL	9	Q2EG98-8|PK1L3_MOUSE:Q2EG98-2|PK1L3_MOUSE:Q2EG98|PK1L3_MOUSE:Q2EG98-3|PK1L3_MOUSE	1					1
IVYEKNCRNDL	11	Q99P91|GPNMB_MOUSE	1					1
KAHMNSVLM	9	Q9CQ10|CHMP3_MOUSE			1			1
KAIENLGVSYV	11	P33610|PRI2_MOUSE					1	1
KAIGNEVTV	9	Q8R349|CDC16_MOUSE			1			1
KAIINIFFL	9	Q8K259|GIN1_MOUSE		1	1			2
KAIKNGSRL	9	O88196|TTC3_MOUSE			1			1
KAILNGIDSI	10	Q9CW03|SMC3_MOUSE	1	1	1	1	1	5
KAIRNVDSI	9	Q3U2J5|CMKMT_MOUSE			1			1
KAISNSHYV	9	Q80XK6|ATG2B_MOUSE			1			1
KAISNSHYVL	10	Q80XK6|ATG2B_MOUSE	1	1	1	1	1	5
KAIVNVIGM	9	Q99NB9|SF3B1_MOUSE	1	1	1	1	1	5
KAKVNQETI	9	Q9D174|S18L2_MOUSE		1	1	1	1	4
KALANMHESL	10	O35382|EXOC4_MOUSE					1	1
KALANVATV	9	P57716|NICA_MOUSE	1					1
KALANVNIGSL	11	P47955|RLA1_MOUSE			1			1
KALEDVDYV	9	Q6P2K6|P4R3A_MOUSE			1		1	2
KALGNEIVV	9	Q18PI6|SLAF5_MOUSE	1		1			2
KALINADEL	9	P16546|SPTN1_MOUSE	1	1	1	1	1	5
KALINPANVTF	11	P97823|LYPA1_MOUSE					1	1
KALKLLDYV	9	B2RXC1|TPC11_MOUSE	1	1				2
KALLNLVQDVM	11	B2RUP2|UN13D_MOUSE			1			1
KALPNIQEI	9	Q7TPM9|MTMRA_MOUSE					1	1
KALQNAVSTF	10	Q99LI8|HGS_MOUSE			1			1
KALSNTTVF	9	Q9DBP0|NPT2B_MOUSE					1	1
KALTLLDYL	9	Q8CHU3-2|EPN2_MOUSE:Q8CHU3|EPN2_MOUSE	1	1	1	1		4
KALVNAVKL	9	Q80TY5|VP13B_MOUSE			1			1
KAMENIGEL	9	Q569Z5-2|DDX46_MOUSE:Q569Z5|DDX46_MOUSE	1		1			2
KANVNLAYL	9	D3Z4I3|RBM24_MOUSE			1			1
KAPDNRETL	9	Q3TDQ1|STT3B_MOUSE	1	1	1	1	1	5
KAPHNVKQDFL	11	A2AWL7-3|MGAP_MOUSE	1		1		1	3
KAPQNLFLV	9	Q01338|ADA2A_MOUSE	1					1
KAPTNEFYA	9	O35988|SDC4_MOUSE	1	1	1		1	4
KAPTNVTCI	9	Q8CC88|VWA8_MOUSE:Q8CC88-2|VWA8_MOUSE	1					1
KAPVNTAEL	9	Q9CWI3|BCCIP_MOUSE	1	1	1	1		4
KATINIDAI	9	Q9WUD8|FAIM1_MOUSE		1	1	1		3
KATTNIVEM	9	Q8K1H7|T11L2_MOUSE	1	1	1	1	1	5
KAVANGKVL	9	Q61458|CCNH_MOUSE			1			1
KAVANQTSATF	11	P62192|PRS4_MOUSE	1		1			2
KAVENSSTAI	10	O70435|PSA3_MOUSE	1	1	1	1	1	5
KAVENYLIQM	10	P56812|PDCD5_MOUSE	1	1	1	1	1	5
KAVINVLNV	9	Q91XQ0|DYH8_MOUSE			1			1
KAVKNFTDV	9	P24270|CATA_MOUSE			1			1
KAVKNWQFV	9	Q9CWY8|RNH2A_MOUSE		1				1
KAVLNPTII	9	Q8C176|TAF2_MOUSE		1	1			2
KAVSNINTL	9	A2AN08|UBR4_MOUSE			1			1
KAVTNEQEL	9	Q8CHZ9|MTERF_MOUSE			1			1
KAVVNDATI	9	Q9D5V5|CUL5_MOUSE			1			1
KAVVNEKVL	9	Q80TL7|MON2_MOUSE			1			1
KAYANPTVV	9	Q7TPD1|FBX11_MOUSE		1				1
KDIGFIKLD	9	P62274|RS29_MOUSE	1					1
KGIGNKTEI	9	Q6P2L6-4|NSD3_MOUSE:Q6P2L6-2|NSD3_MOUSE:Q6P2L6|NSD3_MOUSE	1	1	1	1	1	5
KGIHNFESI	9	Q6GQV7|EDRF1_MOUSE			1			1
KGIVNEQFL	9	P50544|ACADV_MOUSE			1			1
KGIVNYTEKL	10	Q8C167|PPCEL_MOUSE			1			1
KGLANHVVV	9	Q68FE6|FA65A_MOUSE			1			1
KGLLNAIVI	9	P29758|OAT_MOUSE		1	1			2
KGPINFTVF	9	Q9QVP4|MLRA_MOUSE				1		1
KGPQNAFFL	9	P30051|TEAD1_MOUSE	1	1		1	1	4
KGPSNVFKI	9	Q9CZU3|MTREX_MOUSE	1	1	1		1	4
KGQLNADEI	9	Q62448|IF4G2_MOUSE			1			1
KGVFNVEVV	9	Q8R1A4-2|DOCK7_MOUSE:Q8R1A4|DOCK7_MOUSE	1	1		1	1	4
KGVTNWTLYL	10	Q3U0X8|TACT_MOUSE			1			1
KGVYNKSTI	9	Q6P5D8|SMHD1_MOUSE		1	1			2
KHIRNGDVI	9	Q8BH86|CN159_MOUSE			1			1
KIHVNGVDYL	10	Q9D7N3|RT09_MOUSE			1			1
KLAAVAVFFI	10	O08547|SC22B_MOUSE	1					1
KLLSHCLLVTL	11	P01942|HBA_MOUSE	1					1
KMFVNSNHL	9	Q571H0|NPA1P_MOUSE			1			1
KMIENYEAL	9	O54834|RHG06_MOUSE					1	1
KMIINEELM	9	Q8R1B4|EIF3C_MOUSE	1	1	1		1	4
KMLSNKESL	9	Q91W67|UBL7_MOUSE		1	1		1	3
KMVDNRGFM	9	P19324|SERPH_MOUSE					1	1
KMVINRLEKL	10	P42932|TCPQ_MOUSE				1		1
KNLLNVDKI	9	Q8BZN6|DOC10_MOUSE			1		1	2
KNLQTVNVDEN	11	P62900|RL31_MOUSE	1					1
KNLVNKEVM	9	P06745|G6PI_MOUSE	1	1	1			3
KNVPNLHVM	9	P63325|RS10_MOUSE	1					1
KPSGSEPTP	9	Q8BH59|CMC1_MOUSE	1					1
KQALNADYI	9	Q8C522|ENDD1_MOUSE	1					1
KQAQNIVTL	9	Q8R4N0|CLYBL_MOUSE			1			1
KQGQNLWFL	9	Q9Z277|BAZ1B_MOUSE		1	1	1	1	4
KQIANIDRI	9	Q8R5C8|ZMY11_MOUSE			1			1
KQIENGVYL	9	Q4PJX1-2|ODR4_MOUSE:Q4PJX1|ODR4_MOUSE	1		1			2
KQIKNSSLL	9	Q8K039|K1143_MOUSE			1		1	2
KQILNIYDL	9	Q91W86|VPS11_MOUSE	1	1	1	1	1	5
KQIYNLIHL	9	Q9Z2G0|FEM1B_MOUSE		1	1			2
KQLPLVKPYL	10	Q68FD5|CLH1_MOUSE	1					1
KQLVNKEHL	9	Q6PR54|RIF1_MOUSE		1	1			2
KQMLLFTHI	9	Q7TMY8|HUWE1_MOUSE	1	1	1	1		4
KQPLNTTRI	9	P35235|PTN11_MOUSE			1			1
KQSLNGSYM	9	Q8BRB7|KAT6B_MOUSE					1	1
KQTINPILL	9	Q9CZW4|ACSL3_MOUSE	1					1
KQVNNLTNL	9	Q8BMA5|NPAT_MOUSE			1			1
KSIKNANTI	9	Q9QZC2|PLXC1_MOUSE		1				1
KSIKNIQKI	9	Q91VR2|ATPG_MOUSE			1			1
KSISNPPGSNL	11	P83741|WNK1_MOUSE	1					1
KSISNTSKL	9	Q8CJF7|ELYS_MOUSE			1			1
KSIVNQVFL	9	Q9DCN7|RNFT1_MOUSE	1	1	1	1	1	5
KSLDNNYSTL	10	P30999|CTND1_MOUSE					1	1
KSLENILTL	9	Q8K2I9|FBH1_MOUSE	1	1	1	1	1	5
KSLINKNEL	9	Q6NVF0|OCRL_MOUSE:Q6NVF0-2|OCRL_MOUSE	1					1
KSLKLFDFI	9	Q924D0|RT4I1_MOUSE			1			1
KSLKNFITI	9	Q9ER72|SYCC_MOUSE	1	1	1	1	1	5
KSLKNYITI	9	Q8BYM8|SYCM_MOUSE		1	1			2
KSLLLLTTL	9	Q9QYY7|ESM1_MOUSE	1		1			2
KSLLNHDLKL	10	Q3V3Q4|PYDC3_MOUSE	1		1			2
KSLTNDWEDHL	11	P11499|HS90B_MOUSE		1	1		1	3
KSLTNLSFL	9	Q8CH77|NAV1_MOUSE		1				1
KSLVNKGTL	9	P43275|H11_MOUSE	1		1	1	1	4
KSLVSKGTL	9	P43274|H14_MOUSE:P43277|H13_MOUSE	1					1
KSMENLIEL	9	O88413|TULP3_MOUSE		1		1	1	3
KSPASDTYI	9	P70670|NACAM_MOUSE			1			1
KSPLNKTEV	9	Q9R0H0|ACOX1_MOUSE		1	1			2
KSPTAPPDLYF	11	Q9QXM0|ABHD2_MOUSE	1					1
KSTVNKWTL	9	Q8BH57-3|WDR48_MOUSE:Q8BH57-2|WDR48_MOUSE:Q8BH57|WDR48_MOUSE	1	1	1		1	4
KSVANLEYL	9	Q8CHG3|GCC2_MOUSE	1		1			2
KSVENFVSL	9	Q8C3J5|DOCK2_MOUSE	1		1			2
KSVINTTLV	9	O35114|SCRB2_MOUSE	1	1	1	1	1	5
KSYELPDGQVI	11	P60710|ACTB_MOUSE:P63260|ACTG_MOUSE:P68134|ACTS_MOUSE	1					1
KSYVNPTEL	9	Q8BQZ4|RLGPB_MOUSE	1	1	1		1	4
KTHINIVVI	9	P10126|EF1A1_MOUSE	1		1			2
KTIYNVEHL	9	Q9R1W3|RN103_MOUSE	1	1	1		1	4
KTLLNPEYL	9	Q80XQ2|TBCD5_MOUSE	1		1			2
KTVENFVAL	9	P30412|PPIC_MOUSE		1		1	1	3
KTVTNAVVTV	10	P63017|HSP7C_MOUSE	1		1			2
KTVVDIDTI	9	Q9WV68|DECR2_MOUSE			1	1	1	3
KTVVNISSL	9	Q64105|SPRE_MOUSE		1	1			2
KTVVNKDVF	9	P61358|RL27_MOUSE	1					1
KVAVNDAHL	9	P16110|LEG3_MOUSE	1					1
KVESLQEEIAF	11	P20152|VIME_MOUSE	1					1
LAAACGGLAYF	11	Q91V24|ABCA7_MOUSE	1					1
LAIINPVEI	9	Q8BS90|BORA_MOUSE	1		1			2
LAIRNDEEL	9	P27661|H2AX_MOUSE:Q8CGP6|H2A1H_MOUSE:Q64523|H2A2C_MOUSE:Q8R1M2|H2AJ_MOUSE:C0HKE4|H2A1E_MOUSE:Q8BFU2|H2A3_MOUSE:C0HKE6|H2A1I_MOUSE:C0HKE8|H2A1O_MOUSE:C0HKE1|H2A1B_MOUSE:C0HKE5|H2A1G_MOUSE:Q8CGP7|H2A1K_MOUSE:C0HKE2|H2A1C_MOUSE:C0HKE7|H2A1N_MOUSE:Q6GSS7|H2A2A_MOUSE:C0HKE3|H2A1D_MOUSE:Q8CGP5|H2A1F_MOUSE:C0HKE9|H2A1P_MOUSE	1	1	1	1	1	5
LALENEGYI	9	Q6P2K6|P4R3A_MOUSE			1			1
LALENYITAL	10	P12023-2|A4_MOUSE:P12023|A4_MOUSE	1	1		1		3
LALHNSESL	9	Q9CZP7|CD37L_MOUSE			1			1
LALLNGEYL	9	Q4VBE8|WDR18_MOUSE			1			1
LALQLHWPL	9	O35674|ADA19_MOUSE				1		1
LALQNAYQAI	10	P19096|FAS_MOUSE			1			1
LALSNSDVI	9	Q9WUP7|UCHL5_MOUSE			1			1
LALVLHDTL	9	Q3TAP4|AP5B1_MOUSE			1			1
LALVNSTVTI	10	O70374|MTG8R_MOUSE			1			1
LANVNIGSL	9	P47955|RLA1_MOUSE			1	1		2
LAPANTYTV	9	Q3UCQ1-2|FOXK2_MOUSE:Q3UCQ1|FOXK2_MOUSE	1					1
LAPLNQAFF	9	P53986|MOT1_MOUSE		1	1			2
LAPLSDDFL	9	P51125|ICAL_MOUSE					1	1
LAPQNKPEL	9	Q3TGF2|F107B_MOUSE			1			1
LAPTLLTAM	9	Q6PDI5|ECM29_MOUSE			1			1
LAPTNLSSS	9	Q8BTI8-3|SRRM2_MOUSE:Q8BTI8-2|SRRM2_MOUSE:Q8BTI8|SRRM2_MOUSE	1					1
LAPTNLSSSRM	11	Q8BTI8|SRRM2_MOUSE					1	1
LAPVNIFKA	9	P80314|TCPB_MOUSE					1	1
LAVENLSSI	9	Q3UFK8|FRMD8_MOUSE			1			1
LAVLNFTAL	9	Q7TMY8|HUWE1_MOUSE			1			1
LAVQNSDWI	9	Q8BNJ3|NMNA2_MOUSE				1		1
LAVRNDEEL	9	Q64522|H2A2B_MOUSE		1	1	1	1	4
LAVSNHVFHL	10	Q6P1E1|ZMIZ1_MOUSE			1			1
LAVVNGANI	9	O88738|BIRC6_MOUSE		1	1			2
LAVVNGQLM	9	Q8VCK5|KLH20_MOUSE	1		1			2
LFASLLATA	9	Q61207|SAP_MOUSE	1					1
LFRGFSFVAIT	11	P18654|KS6A3_MOUSE	1					1
LGLRNVIYI	9	Q61586|GPAT1_MOUSE			1			1
LGLSNLTHL	9	Q9EQU3|TLR9_MOUSE	1					1
LGLTNSTPM	9	A2AJK6|CHD7_MOUSE					1	1
LGPENCATL	9	A6H8H2|DEN4C_MOUSE	1					1
LGPINQWWL	9	P13864|DNMT1_MOUSE	1	1	1			3
LGPKNGVYI	9	P36423|THAS_MOUSE	1					1
LGPMNIPLI	9	P35700|PRDX1_MOUSE			1			1
LGPPPPSFHL	10	Q8K310|MATR3_MOUSE	1					1
LGVTNFVHM	9	Q3USW5|FXRD2_MOUSE	1		1	1		3
LILQNTTVI	9	Q8CG46|SMC5_MOUSE	1					1
LINQNSDYL	9	Q91V83|TTI1_MOUSE			1		1	2
LMAYMASKE	9	P16858|G3P_MOUSE	1					1
LMLQNALTTM	10	Q9EPU4|CPSF1_MOUSE			1			1
LPETFDAREQ	10	P10605|CATB_MOUSE	1					1
LPKAVVKLD	9	P08508|FCGR3_MOUSE	1					1
LQLINALVL	9	Q6ZQ08|CNOT1_MOUSE			1			1
LQLLNTDYL	9	Q9R0L6|PCM1_MOUSE	1	1	1	1	1	5
LQLQNLATL	9	Q9Z0H4|CELF2_MOUSE			1			1
LQLTNVEHF	9	Q6ZWQ0|SYNE2_MOUSE			1			1
LQMLLTEYL	9	O35382|EXOC4_MOUSE			1			1
LQVQNPQAQTI	11	O89090-2|SP1_MOUSE:O89090|SP1_MOUSE	1				1	2
LSAKNKDYM	9	Q91WG8|GLCNE_MOUSE		1	1			2
LSDEIFLRD	9	Q99P91|GPNMB_MOUSE	1					1
LSGLNQEEL	9	Q3UPF5|ZCCHV_MOUSE			1			1
LSHINRDKL	9	Q99MY8|ASH1L_MOUSE					1	1
LSHINVALI	9	Q9CXK9|RBM33_MOUSE			1			1
LSHVNEEWL	9	O70145|NCF2_MOUSE	1					1
LSIENAEEI	9	Q9QXN3|TRIP4_MOUSE			1	1	1	3
LSIENALVI	9	Q45VK7|DYHC2_MOUSE			1			1
LSIHNGPSV	9	Q6ZPY5|ZN507_MOUSE	1					1
LSILNSNEHL	10	Q8BMK0|CEP85_MOUSE	1	1	1	1	1	5
LSILNSNEHLL	11	Q8BMK0|CEP85_MOUSE					1	1
LSIVNTMFATI	11	Q8BKX6|SMG1_MOUSE			1			1
LSIWNIKFQTL	11	Q8BJW5|NOL11_MOUSE			1			1
LSLENGTHTL	10	P13864|DNMT1_MOUSE	1	1	1	1	1	5
LSLENIATL	9	Q99K43|PRC1_MOUSE	1	1	1	1	1	5
LSLGIGFFAL	10	Q9CPZ3-2|CA185_MOUSE	1					1
LSLLNMTFM	9	Q8BIG4|FBX28_MOUSE			1			1
LSLPNTDYI	9	Q9WTX2|PRKRA_MOUSE	1		1			2
LSMRNTSVM	9	O55003|BNIP3_MOUSE	1	1	1			3
LSNINSVFL	9	Q9Z0M6|CD97_MOUSE	1		1			2
LSPANGEQI	9	Q9QXV3|ING1_MOUSE	1		1			2
LSPENGFWTI	10	Q62191|RO52_MOUSE		1				1
LSPINHNTL	9	Q6QI06|RICTR_MOUSE	1	1	1	1	1	5
LSPINIQLL	9	Q8C456|FRITZ_MOUSE	1	1	1	1	1	5
LSPNNHEVHI	10	Q9R0Q6|ARC1A_MOUSE			1			1
LSVLNHHFI	9	Q3UUQ7|PGAP1_MOUSE			1			1
LSVLNLVIV	9	P62754|RS6_MOUSE		1	1			2
LSVPNKDTV	9	Q9WTU0|PHF2_MOUSE					1	1
LSVQNQDLI	9	Q8BMK0|CEP85_MOUSE			1			1
LSVRNGATL	9	Q8VHJ7|PRGC2_MOUSE:Q8VHJ7-2|PRGC2_MOUSE	1		1			2
LSVSNIIQL	9	P12382|K6PL_MOUSE			1			1
LSVVNQLYL	9	Q80UW3|RINL_MOUSE			1			1
LSVWNQQVL	9	A2ABV5|MED14_MOUSE	1					1
LVGSNITFVVN	11	Q99P91|GPNMB_MOUSE	1					1
LVIFNQEVI	9	Q60520|SIN3A_MOUSE	1					1
LVVENVDVL	9	P28660|NCKP1_MOUSE	1	1		1	1	4
LYIDRPLPYL	10	Q6PGL7|WASC2_MOUSE	1					1
MAGINTDHL	9	E2JF22|PIEZ1_MOUSE			1			1
MALELVTVM	9	Q9R0N0|GALK1_MOUSE			1			1
MALTNVDTP	9	Q6A068|CDC5L_MOUSE					1	1
MAPENKVADWL	11	Q6A065|CE170_MOUSE	1	1	1	1	1	5
MAPQNLSTF	9	Q99KV1|DJB11_MOUSE	1	1	1	1	1	5
MAPQNLSTFCL	11	Q99KV1|DJB11_MOUSE	1					1
MDASLEKIAD	10	Q99K01|PDXD1_MOUSE	1					1
MFGGSGTSSRP	11	P20152|VIME_MOUSE	1					1
MGIENICEL	9	Q60632|COT1_MOUSE	1					1
MGILNTDTL	9	Q8C4V1|RHG24_MOUSE					1	1
MGILNTIDTL	10	Q9EPL8|IPO7_MOUSE					1	1
MGPLGLDHM	9	Q9D0E1|HNRPM_MOUSE	1					1
MKIFVGNVD	9	Q8C2Q3|RBM14_MOUSE	1					1
MKTILSNQTVD	11	P51410|RL9_MOUSE	1					1
MLFETFNTPAM	11	Q9QY84|ACL7A_MOUSE	1					1
MMHSNMETL	9	O08808|DIAP1_MOUSE		1	1			2
MQIFVKTLTG	10	P62983|RS27A_MOUSE:P62984|RL40_MOUSE:P0CG49|UBB_MOUSE:P0CG50|UBC_MOUSE	1					1
MQLVNFPEAL	10	Q8VE73|CUL7_MOUSE		1			1	2
MSIENQEEL	9	Q6RT24|CENPE_MOUSE	1	1	1	1	1	5
MSLSNKLTL	9	P09411|PGK1_MOUSE				1		1
MSLVNKTTHL	10	Q9D8W5|PSD12_MOUSE				1		1
MSMTNATFI	9	Q920I9|WDR7_MOUSE	1	1	1			3
MSPENQEYF	9	Q91V93|RHBT2_MOUSE		1	1			2
NAIANASTL	9	P57784|RU2A_MOUSE	1		1			2
NAIINTLAV	9	Q922V4|PLRG1_MOUSE	1		1			2
NAIKNHWNSTM	11	P06876|MYB_MOUSE			1			1
NAILNMVNI	9	Q8C341|SUCO_MOUSE			1			1
NAIVNTSEM	9	A2AQ14|MS18B_MOUSE	1			1		2
NALANYVFL	9	Q8K0H1|S47A1_MOUSE				1		1
NALENINVI	9	Q69ZZ6|TMCC1_MOUSE		1				1
NALHNIKTL	9	Q9Z0H4|CELF2_MOUSE			1			1
NALLNAGESRL	11	Q9JKK8|ATR_MOUSE					1	1
NALLNSENL	9	Q4QY64|ATAD5_MOUSE	1	1	1	1	1	5
NALLNSLEF	9	P70168|IMB1_MOUSE		1	1	1	1	4
NALNDITSL	9	P58774|TPM2_MOUSE	1					1
NALSNLFTM	9	Q8BXN9|TM87A_MOUSE			1			1
NALSNPKLLQM	11	Q8BZN6|DOC10_MOUSE					1	1
NALVNAYVM	9	Q80TR8|VPRBP_MOUSE			1			1
NANTNTEVL	9	Q9D8B3|CHM4B_MOUSE		1	1	1	1	4
NAPINCVCL	9	Q9DCJ1|LST8_MOUSE	1					1
NAPNNNANL	9	Q8BMI0|FBX38_MOUSE			1			1
NAPPSNPVAM	10	Q80UV9-3|TAF1_MOUSE:Q80UV9|TAF1_MOUSE	1					1
NAPQNPESKL	10	Q9DB00|GON4L_MOUSE	1	1	1		1	4
NAVFNELFV	9	P40749|SYT4_MOUSE				1		1
NAVGNPEYL	9	Q01279|EGFR_MOUSE	1				1	2
NAVKNHWNSTI	11	P48972|MYBB_MOUSE		1	1			2
NAVLNQRYL	9	Q5U465|CC125_MOUSE:Q5U465-2|CC125_MOUSE	1	1				2
NAVRNLQEL	9	Q6IQY5-2|CEP70_MOUSE:Q6IQY5|CEP70_MOUSE	1		1			2
NFGGSRNMGGP	11	O88569|ROA2_MOUSE	1					1
NGPQNIYNL	9	Q8K3C0|RNK_MOUSE	1	1	1	1	1	5
NGVINAAFM	9	Q7M6Y3|PICAL_MOUSE:Q61548|AP180_MOUSE	1	1	1			3
NGVINGAEL	9	Q6DIC0|SMCA2_MOUSE	1		1			2
NGVSNGLHL	9	Q80ZK9|WDTC1_MOUSE		1	1			2
NITLLQSVSN	10	P62305|RUXE_MOUSE	1					1
NLIINTDEL	9	P11983|TCPA_MOUSE			1			1
NLITNPDTL	9	Q8K297|GT251_MOUSE					1	1
NLLENWDTL	9	Q00623|APOA1_MOUSE	1					1
NLLTNKTVM	9	Q9R111|GUAD_MOUSE	1					1
NLSKEDDVRQY	11	P62754|RS6_MOUSE	1					1
NMFENGSFL	9	Q61572|FOXC1_MOUSE		1			1	2
NMHQNIKYI	9	Q6NXH2|MANEA_MOUSE			1			1
NMPWNVDTL	9	Q61081|CDC37_MOUSE	1	1	1	1	1	5
NNQSSNFGP	9	P49312|ROA1_MOUSE	1					1
NQAIKALLQ	9	P62774|MTPN_MOUSE	1					1
NQGTNVETI	9	Q52KB6|C2CD3_MOUSE		1	1	1	1	4
NQHYNTSLL	9	O88907|PIAS1_MOUSE			1		1	2
NQLKNTSTI	9	P54823|DDX6_MOUSE	1	1	1		1	4
NQLQNYRNYL	10	P70399|TP53B_MOUSE		1	1			2
NQLSNHISSLF	11	Q00612|G6PD1_MOUSE:P97324|G6PD2_MOUSE	1					1
NQMVGIEYI	9	Q921D4|MED6_MOUSE					1	1
NQPAGVTSI	9	Q80YT7-2|MYOME_MOUSE:Q80YT7|MYOME_MOUSE	1					1
NQPVNTAVL	9	Q8CHC8|ADNP2_MOUSE					1	1
NQQPSNYGP	9	O88569|ROA2_MOUSE	1					1
NQVKNIAEL	9	Q9QZD4|XPF_MOUSE	1		1			2
NQVVLLDTL	9	Q9R0C0|BL1S6_MOUSE		1	1			2
NSHTNTEVL	9	Q9D7F7|CHM4C_MOUSE					1	1
NSIKNGILYL	10	Q62077|PLCG1_MOUSE	1	1	1	1	1	5
NSIKNHWNSTM	11	P51960|MYBA_MOUSE			1			1
NSILNSSSSL	10	Q6ZQ82|RHG26_MOUSE			1			1
NSIRNLDTI	9	P28658|ATX10_MOUSE	1	1	1	1	1	5
NSISNFLHSL	10	Q5SWU9|ACACA_MOUSE			1			1
NSISNPVTKEM	11	O55236|MCE1_MOUSE			1			1
NSLLNNMEL	9	Q9QXX4|CMC2_MOUSE	1	1	1	1	1	5
NSLLNSLPL	9	Q9CYN9|RENR_MOUSE		1				1
NSLNNLIEL	9	Q4U2R1|HERC2_MOUSE			1		1	2
NSLNNNFLQTL	11	Q9JLV5|CUL3_MOUSE		1	1	1		3
NSLTNIQWL	9	O08696|FOXM1_MOUSE	1	1	1		1	4
NSLVLLEVL	9	Q7TME2|SPAG5_MOUSE			1			1
NSLVNICLI	9	Q8BUH7|RNF26_MOUSE	1					1
NSMVLFDHM	9	Q64511|TOP2B_MOUSE	1	1	1	1	1	5
NSMVLFDHV	9	Q01320|TOP2A_MOUSE	1					1
NSPTNSSPAL	10	Q9DBX1|RGCC_MOUSE			1			1
NSQVNAVTV	9	Q63918|SDPR_MOUSE					1	1
NSQVNFDFI	9	Q60695|RGL1_MOUSE	1				1	2
NSVINVSNL	9	Q9Z0Z3|SKP2_MOUSE	1	1	1	1	1	5
NSVVNPNKATI	11	Q3U2S4|OTUD5_MOUSE	1		1			2
NSYVNPDHL	9	Q3U0D9|HACE1_MOUSE			1			1
NTHENLTYL	9	Q8R0W0|EPIPL_MOUSE		1	1	1	1	4
NTLNNIDVI	9	P47713|PA24A_MOUSE					1	1
NTLTNGSVV	9	Q99LW0|ANR10_MOUSE			1			1
NTPENREYL	9	Q641P0|ARP3B_MOUSE			1			1
NTVLNTCTI	9	Q6DFV6|FN3C1_MOUSE	1					1
NTVTNKVTL	9	Q8BUR3|FOXJ3_MOUSE		1	1		1	3
NVEIDPEIQ	9	Q8VED5|K2C79_MOUSE	1					1
NVELDPEIQ	9	Q6IME9|K2C72_MOUSE	1					1
PAYHSSLMD	9	Q9JM76|ARPC3_MOUSE	1					1
PEKLGQGGVQ	10	P01027|CO3_MOUSE	1					1
PETEQVNGLF	10	Q922D8|C1TC_MOUSE	1					1
PFIAIHAESKI	11	P00687|AMY1_MOUSE	1					1
PIVINHVISVD	11	Q99JR8|SMRD2_MOUSE	1					1
PKEEEEEELVD	11	P99028|QCR6_MOUSE	1					1
PKFEVIDKPQS	11	P97450|ATP5J_MOUSE	1					1
PLDRALAEL	9	P13020|GELS_MOUSE	1					1
PLDRALAELA	10	P13020|GELS_MOUSE	1					1
PLDRALAELAA	11	P13020|GELS_MOUSE	1					1
PLDSTSRIMD	10	P56480|ATPB_MOUSE	1					1
PLLQDKPRTL	10	Q99P91|GPNMB_MOUSE	1					1
PPSAKAAID	9	P56959|FUS_MOUSE	1					1
PPSAKAAIDWF	11	P56959|FUS_MOUSE	1					1
PRANPSAFL	9	Q9CQ88|TSN31_MOUSE:Q9D8C2|TSN13_MOUSE	1					1
PRKIEEIKDF	10	Q9JJI8|RL38_MOUSE	1					1
PRKIEEIKDFL	11	Q9JJI8|RL38_MOUSE	1					1
PSHLNVDYI	9	O35149|ZNT4_MOUSE					1	1
PSKIQLPEDD	10	O09111|NDUBB_MOUSE	1					1
PSNIFGNRNLL	11	Q8C0I1|ADAS_MOUSE	1					1
QAIKNGQAL	9	Q9QXZ0|MACF1_MOUSE	1	1	1	1	1	5
QAINNAINYL	10	Q03267|IKZF1_MOUSE			1			1
QAINNAISYL	10	O08900|IKZF3_MOUSE			1			1
QAINNAITYL	10	P81183|IKZF2_MOUSE			1			1
QAIRNTIYA	9	Q5SQX6|CYFP2_MOUSE			1			1
QAPINFTSRL	10	Q80TR8|VPRBP_MOUSE			1			1
QAPQNKITV	9	P06151|LDHA_MOUSE	1		1			2
QATKNPFYL	9	Q925U4|EDEM1_MOUSE			1			1
QAVENILLSPL	11	P19324|SERPH_MOUSE					1	1
QAVHNGTYI	9	Q3TEW6-2|MPZL1_MOUSE:Q3TEW6|MPZL1_MOUSE	1					1
QAVINGPNV	9	O35134|RPA1_MOUSE			1			1
QAVLNLHSI	9	Q8CI75|DI3L2_MOUSE			1			1
QCLLNVEHL	9	Q78PY7|SND1_MOUSE	1					1
QGIKNSVTL	9	Q6IRU7|CEP78_MOUSE	1		1			2
QGPRNWLLL	9	Q8CGN4|BCOR_MOUSE		1	1			2
QGPVNTWQL	9	Q61068|UBPW_MOUSE			1			1
QKVKNTEYL	9	Q8BHY8|SNX14_MOUSE	1					1
QMALNATYI	9	Q9QXK3|COPG2_MOUSE			1			1
QPGPPGFPT	9	P02463|CO4A1_MOUSE	1					1
QQLLNQQVL	9	Q8VCG9|RFXAP_MOUSE			1			1
QQPSNYGPM	9	O88569|ROA2_MOUSE	1				1	2
QSLLNDTKL	9	Q8VCD7|KDM4C_MOUSE			1			1
QSLLNQEFL	9	Q3UW68|CAN13_MOUSE			1			1
QSLRNIHTL	9	Q9DBY1|SYVN1_MOUSE			1			1
QSLTNILHL	9	Q7TMR0|PCP_MOUSE	1					1
QSLVNLRELYL	11	Q3UM45|PP1R7_MOUSE	1	1	1	1		4
QSVVNLQEM	9	Q61329|ZFHX3_MOUSE			1			1
QTVENVEHL	9	Q91V83|TTI1_MOUSE	1					1
QVSLRVIND	9	Q60696|PMEL_MOUSE	1					1
RAAANSETI	9	Q9DB00|GON4L_MOUSE			1			1
RAAYNVTLL	9	Q8BGW1|FTO_MOUSE			1		1	2
RAIEDADWI	9	Q3UN90|CQ108_MOUSE		1	1			2
RAIELATTL	9	Q80UM3|NAA15_MOUSE		1	1		1	3
RAIENIDTL	9	Q3UM45|PP1R7_MOUSE	1	1	1	1	1	5
RAIHNIFRM	9	Q8K3H0|DP13A_MOUSE			1			1
RAIKNDSVV	9	P80313|TCPH_MOUSE	1	1	1	1		4
RAILNDTKL	9	O35551-2|RABE1_MOUSE:O35551-3|RABE1_MOUSE:O35551|RABE1_MOUSE:O35551-6|RABE1_MOUSE	1		1			2
RAILNYIAT	9	P10648|GSTA2_MOUSE	1	1				2
RAIPNNQVL	9	Q9JMG1|EDF1_MOUSE	1	1	1		1	4
RAIQNHSQTHL	11	Q9ERZ0|HEMGN_MOUSE			1			1
RAIRNMNTL	9	Q9DBY1|SYVN1_MOUSE		1	1		1	3
RAIYNNMKQFI	11	Q8R429|AT2A1_MOUSE:O55143|AT2A2_MOUSE:Q64518|AT2A3_MOUSE	1	1	1			3
RALDNDQHL	9	E9Q555|RN213_MOUSE		1				1
RALELGTVM	9	Q8CIH5|PLCG2_MOUSE	1					1
RALELLNYL	9	O35286|DHX15_MOUSE	1	1	1	1		4
RALENATRDYF	11	O08710|THYG_MOUSE			1			1
RALENPDTA	9	Q6PB44|PTN23_MOUSE		1			1	2
RALENPDTASL	11	Q6PB44|PTN23_MOUSE	1		1			2
RALFNGAQKL	10	P61620|S61A1_MOUSE		1	1		1	3
RALINKHTF	9	Q8BZ32|ASXL2_MOUSE			1		1	2
RALINSRTF	9	P59598|ASXL1_MOUSE			1			1
RALKNFSSL	9	Q03385|GNDS_MOUSE	1					1
RALLLSTYI	9	P17427|AP2A2_MOUSE:P17426-2|AP2A1_MOUSE:P17426|AP2A1_MOUSE	1	1	1	1		4
RALLNAESL	9	Q8VEG4|EXD2_MOUSE		1	1			2
RALQLLDEV	9	P97471|SMAD4_MOUSE	1	1	1	1		4
RALQLLYDL	9	Q9Z160|COG1_MOUSE		1				1
RALSNLESI	9	Q8R317-2|UBQL1_MOUSE	1	1	1	1	1	5
RALSNLESV	9	Q99NB8|UBQL4_MOUSE			1		1	2
RALSNSVSNM	10	Q9WVH4|FOXO3_MOUSE			1			1
RALVMLLEV	9	Q8BFY9|TNPO1_MOUSE			1			1
RALVSVVSL	9	P18761|CAH6_MOUSE	1					1
RAPEGDDFL	9	Q5U4C3|SFR19_MOUSE	1	1	1		1	4
RAPELFSYI	9	P97789|XRN1_MOUSE			1			1
RAPQNFHAI	9	P55144|TYRO3_MOUSE			1			1
RAPRNIHRHVI	11	Q8R3L2|TCF25_MOUSE			1			1
RAPSNQNWL	9	Q60841|RELN_MOUSE				1		1
RAPTGSTEL	9	A2ACJ2|FP100_MOUSE	1	1	1		1	4
RAPTGYDVV	9	Q6KAU4|MB12B_MOUSE	1	1	1	1	1	5
RAPVKYDHI	9	Q8VEB2|SAV1_MOUSE			1		1	2
RATSNVFAM	9	Q3THE2|ML12B_MOUSE			1		1	2
RAVDNQVYV	9	Q9JHW2|NIT2_MOUSE		1	1			2
RAVKNQIAL	9	Q9JKX4|AATF_MOUSE		1	1			2
RAVQNHNTYM	10	Q61549|AGRE1_MOUSE	1					1
REDAAPATLEL	11	B0V2N1|PTPRS_MOUSE	1					1
RGIVNLSEL	9	Q33DR3|DLP1_MOUSE	1	1	1	1		4
RGLDNREEV	9	Q69Z38|PEAK1_MOUSE					1	1
RGLENLTLL	9	Q6R5N8|TLR13_MOUSE	1					1
RGLLNQVFL	9	Q9WVL5|MORC1_MOUSE			1			1
RGNLNGETI	9	Q60841|RELN_MOUSE				1		1
RGPENLLDHQM	11	Q91ZV0|MIA2_MOUSE	1					1
RGPLNQTAL	9	Q9ERK0|RIPK4_MOUSE					1	1
RGPSNAFFL	9	Q62296|TEAD4_MOUSE	1	1		1		3
RGPVNLQHL	9	Q80XU8|LRFN4_MOUSE	1		1			2
RGVGNWEFI	9	Q8K4E0|ALMS1_MOUSE		1	1			2
RIIENVDVI	9	Q8R2S9|ARP8_MOUSE			1			1
RILAHLTGTEF	11	Q3TJD7|PDLI7_MOUSE	1					1
RIMELLEYM	9	O08648|M3K4_MOUSE			1			1
RINEILSNALK	11	Q9D0E1|HNRPM_MOUSE	1					1
RIVENVNVI	9	P58252|EF2_MOUSE	1					1
RIVLNQEVM	9	Q9QZ82|CP11A_MOUSE			1			1
RLITLADHI	9	Q60974|NCOR1_MOUSE	1					1
RLITNSEEI	9	P55096|ABCD3_MOUSE	1					1
RLITNSEEIAF	11	P55096|ABCD3_MOUSE	1					1
RLLLNNDNL	9	P47753|CAZA1_MOUSE			1			1
RLNLNNTVL	9	Q8CGC7|SYEP_MOUSE			1			1
RMGPLGLDHM	10	Q9D0E1|HNRPM_MOUSE	1					1
RMIQNQNAA	9	Q9DBR1|XRN2_MOUSE			1	1	1	3
RMLENYEEI	9	Q8VE73|CUL7_MOUSE		1		1	1	3
RMLHLLDVI	9	Q45VK7|DYHC2_MOUSE			1			1
RMMHSNMETL	10	O08808|DIAP1_MOUSE			1			1
RMPEKVTWM	9	P84099|RL19_MOUSE	1					1
RMYTDIQEPM	10	Q8R317|UBQL1_MOUSE					1	1
RNISNQLVI	9	Q8BQY8|HUS1_MOUSE			1			1
RQAENGMYI	9	B2RQC6-2|PYR1_MOUSE:B2RQC6|PYR1_MOUSE	1					1
RQATNQIVM	9	Q11011|PSA_MOUSE		1	1			2
RQFLNRDDI	9	Q9D1K2|VATF_MOUSE	1	1	1			3
RQFPNRDAL	9	Q91YE7-2|RBM5_MOUSE:Q91YE7|RBM5_MOUSE	1	1	1		1	4
RQFTNALLESL	11	Q6P9S0|MTSSL_MOUSE		1		1		2
RQGANINEI	9	P60335|PCBP1_MOUSE	1	1	1		1	4
RQIFNGTFV	9	P14148|RL7_MOUSE		1	1	1	1	4
RQIGNRDTL	9	Q8VCF0|MAVS_MOUSE					1	1
RQILNADAM	9	A2AIV2|VIR_MOUSE	1	1	1	1		4
RQLENGTTL	9	Q3TZZ7|ESYT2_MOUSE	1	1	1	1	1	5
RQLENTEHM	9	Q6P1D7|SLX4_MOUSE		1	1			2
RQPQNPPATI	10	O35144|TERF2_MOUSE			1			1
RQPSIELPSM	10	P19973|LSP1_MOUSE	1					1
RQTVNVIAM	9	Q61187|TS101_MOUSE		1			1	2
RQVENVLSL	9	Q501J2|F173A_MOUSE		1	1	1	1	4
RQVQNTAITL	10	Q69ZX6|MOR2A_MOUSE	1	1	1	1	1	5
RQWANLMEKI	10	P08226|APOE_MOUSE	1	1				2
RSFANDDRHVM	11	Q91WM1|STRBP_MOUSE			1		1	2
RSFENNTYL	9	Q9D4G9|RMI1_MOUSE			1		1	2
RSGGNLEVM	9	O35864|CSN5_MOUSE			1		1	2
RSGVNSELV	9	Q7TNV0|DEK_MOUSE		1	1	1	1	4
RSHLNSIKAYI	11	P15089|CBPA3_MOUSE			1			1
RSHQNASSI	9	Q8VBX6|MPDZ_MOUSE		1				1
RSIGNKNTI	9	P70187|HIAT1_MOUSE			1			1
RSIKNVTEL	9	Q99K95|RTF2_MOUSE	1	1	1	1	1	5
RSIQNAQFL	9	P24638|PPAL_MOUSE	1	1	1	1	1	5
RSIQNNPSI	9	Q6P4S8|INT1_MOUSE			1			1
RSITNDSAVL	10	Q99LI8|HGS_MOUSE			1			1
RSLADVDTI	9	Q61292|LAMB2_MOUSE		1	1	1		3
RSLDNAESL	9	Q7TS75|AMER1_MOUSE			1			1
RSLDNGGYYI	10	P25911-2|LYN_MOUSE:P16277|BLK_MOUSE:P25911|LYN_MOUSE	1			1	1	3
RSLENEPQNMM	11	Q8K1N2|PHLB2_MOUSE					1	1
RSLENRVTF	9	Q99KC8|VMA5A_MOUSE		1	1	1	1	4
RSLENYHFV	9	Q99KN9|EPN4_MOUSE			1	1	1	3
RSLGNDVKSYL	11	Q9CYI0|NJMU_MOUSE	1	1	1	1	1	5
RSLHNLAHLFL	11	P07147|TYRP1_MOUSE		1				1
RSLLLLAPL	9	Q9R0E2|PLOD1_MOUSE	1	1	1	1	1	5
RSLLNSHIL	9	Q6VNB8|WDFY3_MOUSE	1	1		1		3
RSLLNSHILHL	11	Q6VNB8|WDFY3_MOUSE		1	1			2
RSLLNWRTKL	10	Q9DBE9|SPB1_MOUSE	1	1	1			3
RSLRHVNIDHL	11	Q91WK2|EIF3H_MOUSE			1			1
RSLSNATII	9	P14576|SRP54_MOUSE		1	1	1	1	4
RSLSNLTEI	9	Q62217|SEM5A_MOUSE			1			1
RSLSNSGVL	9	O88738|BIRC6_MOUSE			1			1
RSMQNYVQFL	10	A3KGV1|ODFP2_MOUSE	1	1	1	1		4
RSNENLDKI	9	Q91Z49|UIF_MOUSE			1			1
RSPENKFPVI	10	O08750|NFIL3_MOUSE				1	1	2
RSPENPPSKEL	11	Q9CQA0|CENPM_MOUSE	1					1
RSPENVIETI	10	E9PVA8|GCN1_MOUSE	1					1
RSPGNSPTPM	10	Q8CI61|BAG4_MOUSE	1					1
RSPINVESL	9	P70336|ROCK2_MOUSE		1				1
RSPLNSYSDLI	11	Q64345|IFIT3_MOUSE		1				1
RSVDNIQFL	9	Q9CXK4|SWET1_MOUSE		1	1	1	1	4
RSVGNTVVL	9	Q99J38|T30A1_MOUSE		1				1
RSVLNNQLL	9	Q922J3|CLIP1_MOUSE			1			1
RTIRNAMKI	9	Q8R1B4|EIF3C_MOUSE			1			1
RTIRNQNTV	9	Q0VBD2|MCM10_MOUSE		1	1			2
RTISNPEVVM	10	Q9QZQ1|AFAD_MOUSE					1	1
RTLTGQDTM	9	Q8BGV7|BACD1_MOUSE			1			1
RTNVNFQYI	9	Q8C0N2|GPAT3_MOUSE			1		1	2
RTVENVTVF	9	Q62465|VAT1_MOUSE	1					1
RVFQNEVLGTL	11	Q8CHW4|EI2BE_MOUSE	1					1
RVLITTDLL	9	P60843|IF4A1_MOUSE:P10630|IF4A2_MOUSE	1					1
RVLLNIMYL	9	Q8C079|FA40A_MOUSE			1			1
RVPINETFI	9	Q8C2E7|WASC5_MOUSE	1					1
RVVANSEEI	9	P48410|ABCD1_MOUSE		1	1	1		3
SAAFNIVYI	9	Q504N2|S22AF_MOUSE		1	1	1	1	4
SAAFNQLPHL	10	Q7TN98|CPEB4_MOUSE	1					1
SAALNKDFL	9	E9Q309|CE350_MOUSE	1					1
SAATNPNAM	9	Q8BH04|PCKGM_MOUSE		1				1
SAETNLEAL	9	P31938|MP2K1_MOUSE			1			1
SAFSNLSTSQM	11	O35382|EXOC4_MOUSE			1			1
SAGTSLVNF	9	P09813|APOA2_MOUSE	1					1
SAHLNALKM	9	Q8K2Z4|CND1_MOUSE			1			1
SAHQNYAEWL	10	Q99PL5|RRBP1_MOUSE	1	1	1	1	1	5
SAHSNINQI	9	Q8K4K3|TRIB2_MOUSE			1		1	2
SAIANIPAAAV	11	P97480-2|EYA3_MOUSE:P97480|EYA3_MOUSE	1		1	1		3
SAIANPTDVL	10	Q9CR58|KMCP1_MOUSE				1		1
SAIENMAEKL	10	P14404|EVI1_MOUSE	1	1				2
SAIFNFQSL	9	Q9CR64|KISHA_MOUSE	1	1	1	1	1	5
SAIFNFQSLL	10	Q9CR64|KISHA_MOUSE	1	1	1	1	1	5
SAIFNNVMTL	10	Q9JIM1|S29A1_MOUSE	1	1	1	1	1	5
SAIHNFYDNI	10	Q99K90|TAB2_MOUSE	1	1	1	1		4
SAIHNSTKV	9	Q80SU7|GVIN1_MOUSE			1		1	2
SAIIDSDNV	9	Q8BPY9|FIGL1_MOUSE	1					1
SAIINEDNL	9	Q8BG67|EFR3A_MOUSE	1	1	1	1	1	5
SAIINLFHL	9	Q80YV3|TRRAP_MOUSE	1	1	1	1		4
SAIINLFHLI	10	Q80YV3|TRRAP_MOUSE	1	1	1	1		4
SAIKNEVDSTV	11	P23906|IRF2_MOUSE			1			1
SAILDHPPSPM	11	Q8K4J6-2|MKL1_MOUSE:Q8K4J6|MKL1_MOUSE	1	1	1			3
SAILNEWTL	9	Q7TSI1|PKHM1_MOUSE	1	1		1		3
SAILNGRNLL	10	Q8VHY0|CSPG4_MOUSE	1					1
SAILSDPESHI	11	Q8VI84|NOC3L_MOUSE	1					1
SAIMNPASKV	10	Q68FD5|CLH1_MOUSE	1		1		1	3
SAIMNPASKVI	11	Q68FD5|CLH1_MOUSE	1	1	1	1	1	5
SAIQNLHSF	9	P48024|EIF1_MOUSE		1	1	1	1	4
SAIQNLHSFD	10	P48024|EIF1_MOUSE	1					1
SAIQNLHSFDP	11	P48024|EIF1_MOUSE	1					1
SAIQSISHV	9	P14404|EVI1_MOUSE		1			1	2
SAIRGQAEV	9	P59598|ASXL1_MOUSE	1					1
SAIRNGTDM	9	Q6NZQ0|CP093_MOUSE		1	1	1		3
SAIRSGLEL	9	Q6A026|PDS5A_MOUSE			1		1	2
SAIRSLEAV	9	Q8C2B3|HDAC7_MOUSE			1			1
SAISLKANI	9	Q9JLV2|TP4AP_MOUSE			1			1
SAISNASGERL	11	Q80SY4|MIB1_MOUSE			1		1	2
SAISNLDYI	9	Q9R0C8|VAV3_MOUSE	1		1	1	1	4
SAISNWVQF	9	Q8BZ60|STON2_MOUSE			1			1
SAITLLGVM	9	A2AGT5|CKAP5_MOUSE			1			1
SAITNVAKI	9	Q9D757|DAPL1_MOUSE			1			1
SAIVLKQEI	9	O88879|APAF_MOUSE			1			1
SAIVNFTLQHL	11	Q58FA4|E2F8_MOUSE		1	1			2
SAIVNLPGCSA	11	Q9QZE5|COPG1_MOUSE	1					1
SAIYNLLGI	9	Q8C261|NCKX5_MOUSE		1				1
SALAASALPAL	11	Q9D8E6|RL4_MOUSE	1					1
SALANGRAL	9	Q64317|DLX1_MOUSE			1			1
SALANYIHL	9	Q8BPS4|GP180_MOUSE	1	1	1	1	1	5
SALDNGPQI	9	Q8C863|ITCH_MOUSE	1		1			2
SALEDLEVL	9	Q9CQA5|MED4_MOUSE			1		1	2
SALEFLTHL	9	Q8C3R1|BRAT1_MOUSE			1			1
SALENAENHV	10	Q32P12|CQ053_MOUSE	1	1	1			3
SALENGRYEL	10	O88379|BAZ1A_MOUSE	1	1	1		1	4
SALENGRYELL	11	O88379|BAZ1A_MOUSE			1			1
SALENHPFTL	10	Q9JHI8|NOX4_MOUSE	1	1				2
SALENLKIQM	10	Q6ZWR6|SYNE1_MOUSE					1	1
SALGNVTTC	9	O55135|IF6_MOUSE	1					1
SALILRTKL	9	Q8CD92|TTC27_MOUSE			1			1
SALINLSSF	9	Q8VE65|TAF12_MOUSE			1			1
SALINLVEF	9	P97313|PRKDC_MOUSE	1	1	1	1	1	5
SALKLYENL	9	Q8CES0|NAA30_MOUSE			1			1
SALLLKDVL	9	Q8BZ36|RINT1_MOUSE	1	1	1	1	1	5
SALLNSIVKL	10	D3YXG0-2|HMCN1_MOUSE:D3YXG0|HMCN1_MOUSE	1					1
SALNNFQVV	9	Q9ER00|STX12_MOUSE	1	1	1	1	1	5
SALQLNHTA	9	Q91ZR2|SNX18_MOUSE	1					1
SALQNAESDRL	11	Q6RT24|CENPE_MOUSE	1	1	1	1	1	5
SALQNFASTF	10	Q3UGY8|BIG3_MOUSE	1	1	1			3
SALQNNFFI	9	Q9R1R2|TRIM3_MOUSE		1				1
SALQNVKRL	9	P97390|VPS45_MOUSE			1			1
SALQSLLHL	9	Q60960|IMA1_MOUSE		1	1			2
SALRLLEAL	9	Q5GH66|XKR5_MOUSE		1	1	1		3
SALRMADVI	9	Q8BZS9|DHX32_MOUSE	1	1	1	1	1	5
SALRSLSNATI	11	P14576|SRP54_MOUSE			1			1
SALSDLHAHKL	11	P01942|HBA_MOUSE					1	1
SALSLGPFL	9	Q6P8H8|ALG8_MOUSE			1			1
SALSNEETV	9	Q8K4E0|ALMS1_MOUSE:Q8K4E0-2|ALMS1_MOUSE	1					1
SALTGGTAHL	10	Q9DB96|NGDN_MOUSE			1			1
SALTNCITQL	10	Q8BI84|TGO1_MOUSE	1					1
SALVGAAVI	9	P70170|ABCC9_MOUSE	1					1
SALVGHHVI	9	Q920R0|ALS2_MOUSE			1			1
SALVHLEVL	9	Q3ULM6|USPL1_MOUSE	1	1	1			3
SALVKEEYL	9	Q91ZU6|DYST_MOUSE:Q91ZU6-3|DYST_MOUSE:Q91ZU6-4|DYST_MOUSE:Q91ZU6-2|DYST_MOUSE	1		1	1	1	4
SALVNNTIF	9	Q8R418|DICER_MOUSE					1	1
SALVNYRAL	9	Q9Z0R6|ITSN2_MOUSE			1		1	2
SALVSSLHL	9	Q9QZE5|COPG1_MOUSE	1		1			2
SALVSSLHM	9	Q9QXK3|COPG2_MOUSE			1			1
SAMELIWNL	9	Q8R480|NUP85_MOUSE	1					1
SAMRNLNGREF	11	Q8BIQ5|CSTF2_MOUSE			1			1
SAMSNPRAM	9	Q8R317|UBQL1_MOUSE			1		1	2
SANHNILQI	9	Q61656|DDX5_MOUSE	1				1	2
SAPANGILV	9	E9Q1P8|I2BP2_MOUSE	1	1	1	1	1	5
SAPANPSSNI	10	Q8CI08|SLAI2_MOUSE:Q8CI08-2|SLAI2_MOUSE	1		1			2
SAPAPSNSHL	10	Q3TC46|PATL1_MOUSE	1					1
SAPDNVLEV	9	Q69ZR2|HECD1_MOUSE	1	1	1	1	1	5
SAPENAVRM	9	O35127|C10_MOUSE	1	1	1	1	1	5
SAPFPAPDTI	10	Q8BGS1|E41L5_MOUSE	1		1	1	1	4
SAPINSVLL	9	Q8C4N4|LAAT1_MOUSE:Q9CX97|WDR55_MOUSE	1	1	1			3
SAPISSLFL	9	Q3V384|LACE1_MOUSE			1			1
SAPKGYTTF	9	Q9Z183|PADI4_MOUSE	1					1
SAPKYIDYL	9	Q921Y0|MOB1A_MOUSE			1	1	1	3
SAPLGDFRHTL	11	Q9Z0X0|BORG3_MOUSE	1	1		1	1	4
SAPLGDFRHTM	11	Q9JM96|BORG4_MOUSE	1					1
SAPLGREHL	9	Q60787|LCP2_MOUSE			1			1
SAPLPPSIFM	10	Q920E5|FPPS_MOUSE	1					1
SAPNNITVL	9	P23780|BGAL_MOUSE			1			1
SAPQDIYAV	9	Q8C570|RAE1L_MOUSE					1	1
SAPQDKGFL	9	P58801|RIPK2_MOUSE			1			1
SAPQSAVEL	9	Q99KN9|EPN4_MOUSE:Q99KN9-2|EPN4_MOUSE	1	1				2
SAPRDAYWI	9	Q8CII2|CD123_MOUSE		1	1		1	3
SAPRDLFDM	9	P98083|SHC1_MOUSE	1	1	1	1	1	5
SAPRNFVENF	10	Q91WG4|ELP2_MOUSE	1	1	1	1	1	5
SAPRNSRNF	9	Q80YR7|CLSPN_MOUSE			1			1
SAPSADAPM	9	P16858|G3P_MOUSE	1				1	2
SAPSNFEHRV	10	Q8BTW9|PAK4_MOUSE	1		1		1	3
SAPSNPWGGL	10	Q7TN99-6|CPEB3_MOUSE:Q7TN99-5|CPEB3_MOUSE:Q7TN99-4|CPEB3_MOUSE:Q7TN99-3|CPEB3_MOUSE:Q7TN99-2|CPEB3_MOUSE:Q7TN99|CPEB3_MOUSE	1					1
SAPSSPAEYI	10	Q6NZQ2|DDX31_MOUSE	1					1
SAPSSPDAL	9	Q9D842-2|APLF_MOUSE:Q9D842-3|APLF_MOUSE:Q9D842|APLF_MOUSE	1					1
SAPSSSSLSTL	11	Q9DBR7-2|MYPT1_MOUSE:Q9DBR7|MYPT1_MOUSE	1					1
SAPTARVFM	9	Q91YR7|PRP6_MOUSE	1		1			2
SAPTGSGKTL	10	Q8K301|DDX52_MOUSE	1					1
SAPTNTGSTGL	11	Q8BTS4|NUP54_MOUSE	1		1	1	1	4
SAPTSPTRL	9	Q8BGV8|MID51_MOUSE			1			1
SAPVAAEPF	9	Q60597-2|ODO1_MOUSE:Q60597|ODO1_MOUSE:Q60597-4|ODO1_MOUSE:Q60597-3|ODO1_MOUSE	1					1
SAPVAAEPFL	10	Q60597|ODO1_MOUSE	1					1
SAPVGGSYNL	10	Q64127|TIF1A_MOUSE					1	1
SAPVMLTVL	9	Q9ERM2|ICAM4_MOUSE			1			1
SAPVNFISA	9	Q9ERA6|TFP11_MOUSE	1	1		1	1	4
SAPVNGSVFI	10	Q91XF4|RN167_MOUSE	1	1	1	1		4
SAPVNIPGSL	10	Q8BL48|UNK_MOUSE			1			1
SAPVNKAEL	9	Q80YS6|AFAP1_MOUSE	1		1			2
SAPVNMTTYV	10	Q9R207|NBN_MOUSE	1					1
SAPVPFTVL	9	A2AN08|UBR4_MOUSE					1	1
SAPYGRITL	9	Q5SQX6|CYFP2_MOUSE:Q7TMB8|CYFP1_MOUSE	1	1	1	1	1	5
SASVNRYIL	9	A2AN08|UBR4_MOUSE					1	1
SATINAEFV	9	Q66K08|CILP1_MOUSE	1					1
SAVDNQVNL	9	Q91XQ0|DYH8_MOUSE			1			1
SAVENILEHL	10	P58064|RT06_MOUSE	1	1	1	1	1	5
SAVENKDKL	9	G3X912|SPRTN_MOUSE			1			1
SAVENKQQI	9	P53351|PLK2_MOUSE	1	1		1	1	4
SAVENLNEM	9	Q80UM3|NAA15_MOUSE	1	1	1	1	1	5
SAVENVVKL	9	Q8VI78|PLA1A_MOUSE	1					1
SAVFNGSIL	9	P48754|BRCA1_MOUSE	1		1		1	3
SAVGNDTQL	9	P61406|EST1A_MOUSE	1					1
SAVHNKPSL	9	Q6ZQ73|CAND2_MOUSE			1			1
SAVISLEGKPL	11	P18760|COF1_MOUSE	1					1
SAVISSIAHYL	11	Q7TMV1|RN139_MOUSE			1	1	1	3
SAVKNDYEM	9	Q8VEE4|RFA1_MOUSE	1	1	1	1	1	5
SAVKNDYEMTF	11	Q8VEE4|RFA1_MOUSE			1		1	2
SAVKNLQQL	9	Q8VIJ8|NPRL3_MOUSE	1	1	1	1	1	5
SAVKNVPSV	9	Q69Z23|DYH17_MOUSE					1	1
SAVLNGFSHL	10	Q8BH55|THNS1_MOUSE			1			1
SAVPNQISI	9	Q8C5D8-3|PIAS2_MOUSE:Q8C5D8-2|PIAS2_MOUSE:Q8C5D8-4|PIAS2_MOUSE:Q8C5D8-5|PIAS2_MOUSE:Q8C5D8|PIAS2_MOUSE	1		1	1	1	4
SAVQNLVVEGL	11	Q76N33|STALP_MOUSE			1			1
SAVQNVADV	9	Q9JHU4|DYHC1_MOUSE	1	1	1	1		4
SAVRNGLLLL	10	Q80TT8|CUL9_MOUSE	1			1		2
SAVSNNYIQTL	11	P30999|CTND1_MOUSE	1	1		1	1	4
SAVTDFDFI	9	Q9CUX1|P52K_MOUSE	1	1	1	1	1	5
SAVTNKAYVF	10	O35114|SCRB2_MOUSE	1					1
SAVTNSGVHL	10	Q9CY28|GTPB8_MOUSE	1	1	1			3
SAVVDFEAL	9	Q6PR54|RIF1_MOUSE			1			1
SAVVDKDFL	9	P55264|ADK_MOUSE	1	1	1	1	1	5
SAVVHEYAL	9	Q61263|SOAT1_MOUSE			1			1
SAVVNKVPL	9	Q9DAM7|TM263_MOUSE	1					1
SAVWNSPPL	9	Q9WU62|INCE_MOUSE		1	1	1	1	4
SAYLNGHWL	9	Q60790|RASA3_MOUSE		1				1
SAYLNMFEHI	10	Q99N16|CP4F3_MOUSE	1					1
SCPANLPNI	9	Q08874-6|MITF_MOUSE:Q08874-5|MITF_MOUSE:Q08874-9|MITF_MOUSE:Q08874-3|MITF_MOUSE:Q08874-8|MITF_MOUSE:Q08874-7|MITF_MOUSE:Q08874-2|MITF_MOUSE:Q08874-4|MITF_MOUSE:Q08874|MITF_MOUSE	1					1
SDILGKYVD	9	Q64433|CH10_MOUSE	1					1
SFTLELEED	9	P54818|GALC_MOUSE	1					1
SFTVNRPFL	9	Q61247|A2AP_MOUSE	1					1
SGGVNLQSM	9	P17918|PCNA_MOUSE			1			1
SGHLNLYLL	9	P21180|CO2_MOUSE		1				1
SGHTNAVATV	10	Q922V4|PLRG1_MOUSE			1		1	2
SGIIDSDFL	9	Q9D8P7|TF3C6_MOUSE	1	1	1	1	1	5
SGIINFIHF	9	Q99P69|NUF2_MOUSE		1	1	1	1	4
SGIKNPVSV	9	Q8R1G1|TASP1_MOUSE	1	1	1	1		4
SGIRNISFM	9	O35598|ADA10_MOUSE	1	1	1	1	1	5
SGITNQMSI	9	Q01065|PDE1B_MOUSE	1					1
SGITNSASSTL	11	Q6A068|CDC5L_MOUSE	1		1			2
SGLCNEDHL	9	Q8CFI0|NED4L_MOUSE:P46935|NEDD4_MOUSE	1					1
SGLENTAAL	9	Q8R311|CTGE5_MOUSE			1			1
SGLILLETI	9	Q8C419|GP158_MOUSE	1					1
SGLINHQRI	9	Q91VN1|ZNF24_MOUSE	1		1			2
SGLLNPYSL	9	Q6ZPV2|INO80_MOUSE	1	1	1		1	4
SGLLNQQSL	9	Q9DB40-2|MED27_MOUSE:Q9DB40|MED27_MOUSE	1	1	1	1	1	5
SGLLNSQAL	9	P19096|FAS_MOUSE	1	1	1	1	1	5
SGLLNVLEV	9	Q9R111|GUAD_MOUSE	1					1
SGLQNFEAL	9	Q99KD5|UN45A_MOUSE	1	1	1	1	1	5
SGLQNFEALM	10	Q99KD5|UN45A_MOUSE			1			1
SGLSGHTTL	9	P27546|MAP4_MOUSE	1					1
SGLTMITHL	9	Q5U4C1|GASP1_MOUSE			1		1	2
SGLTNRDTL	9	Q9EQJ9|MAGI3_MOUSE	1	1	1			3
SGLVNHVPL	9	P31230|AIMP1_MOUSE	1	1	1	1	1	5
SGLVNQSNM	9	Q9D0Q7|RM45_MOUSE			1			1
SGNENGEFYL	10	Q8BPB5|FBLN3_MOUSE					1	1
SGPINFTVF	9	P97457|MLRS_MOUSE	1	1	1	1	1	5
SGPINFTVFL	10	P97457|MLRS_MOUSE	1	1	1	1		4
SGPLDSTFI	9	Q9D818|SAPC2_MOUSE	1	1	1	1	1	5
SGPMNEILI	9	Q9CXG9|PHF19_MOUSE			1			1
SGPQNTRSSHL	11	Q9Z2U2|ZN292_MOUSE			1			1
SGPQNVQHQL	10	Q8CHI8|EP400_MOUSE			1			1
SGPSNIAQV	9	Q6Q473|CLCA4_MOUSE					1	1
SGPTNASAF	9	P27546|MAP4_MOUSE	1					1
SGPTNEDLYI	10	Q01237|HMDH_MOUSE	1	1	1	1	1	5
SGPTSLFAV	9	Q8VEK3|HNRPU_MOUSE	1					1
SGPVHISGQHL	11	Q61937|NPM_MOUSE	1					1
SGPVSLQTL	9	Q9JM98|WRP73_MOUSE			1		1	2
SGVFNVSEL	9	P97863|NFIB_MOUSE	1					1
SGVGFGGLEAM	11	Q8C854-3|MYEF2_MOUSE	1					1
SGVGNYISA	9	Q920Q6-2|MSI2H_MOUSE:Q920Q6|MSI2H_MOUSE	1					1
SGVSNPHVI	9	Q3TUF7|YETS2_MOUSE	1	1	1		1	4
SGVWNVTEL	9	P70257|NFIX_MOUSE	1	1	1	1	1	5
SHLLNTSTL	9	O88466|ZN106_MOUSE	1					1
SHVTNVAFL	9	Q7TNG5|EMAL2_MOUSE:Q7TNG5-2|EMAL2_MOUSE	1		1			2
SHVTNVDFL	9	Q05BC3|EMAL1_MOUSE	1		1	1	1	4
SIHGTNPQYL	10	Q4FK66|PR38A_MOUSE	1					1
SIISNLITV	9	Q9ESJ0|XPO4_MOUSE			1			1
SILVNQEVL	9	P42228|STAT4_MOUSE	1	1				2
SIVFNGPHL	9	Q9CWR2|SMYD3_MOUSE	1					1
SKFDVSGYPTI	11	P08003|PDIA4_MOUSE	1					1
SKGPAVGID	9	P63017|HSP7C_MOUSE	1					1
SKLANIDYL	9	Q811L6|MAST4_MOUSE	1				1	2
SKMELGTPL	9	Q8BTI8|SRRM2_MOUSE			1			1
SLGINPHVL	9	Q6PFD9|NUP98_MOUSE	1					1
SLGKNPTDAYL	11	Q3THE2|ML12B_MOUSE	1					1
SLIILKQVM	9	Q9Z2U1|PSA5_MOUSE	1					1
SLIRNLEQL	9	Q64324|STXB2_MOUSE		1	1		1	3
SLISNGPSL	9	E9Q7E2|ARID2_MOUSE	1					1
SLITNKVVM	9	P23492|PNPH_MOUSE	1		1			2
SLITNSHADHL	11	O88491|NSD1_MOUSE	1		1			2
SLLNKPKSEM	10	P62317|SMD2_MOUSE	1					1
SLLQNGVNL	9	Q80TH2|LAP2_MOUSE			1		1	2
SLLSNLDEI	9	Q9WU78|PDC6I_MOUSE	1	1	1			3
SLLTNADYT	9	O35864|CSN5_MOUSE			1			1
SLLTNHVTL	9	O88904|HIPK1_MOUSE	1	1	1	1	1	5
SLLTNSIYL	9	Q9CZJ0|MPPD2_MOUSE			1			1
SLPTNLIHL	9	Q6WKZ8|UBR2_MOUSE	1					1
SLRVINDGP	9	Q60696|PMEL_MOUSE	1					1
SLRVINDGPT	10	Q60696|PMEL_MOUSE	1					1
SLSNKLTLD	9	P09411|PGK1_MOUSE	1					1
SLVKNVAHM	9	Q91VY9|ZN622_MOUSE			1			1
SLYDKKYLPHL	11	Q80VA5|S3TC2_MOUSE	1					1
SMAENSIPL	9	P58462-2|FOXP1_MOUSE:P58462|FOXP1_MOUSE:P58462-5|FOXP1_MOUSE	1	1	1	1	1	5
SMAGNIIPAI	10	Q9Z1F9|SAE2_MOUSE	1					1
SMEQNLLVL	9	Q8BMA5|NPAT_MOUSE			1			1
SMEVNVDTL	9	Q9CRD4|DBND2_MOUSE	1	1		1	1	4
SMEVNVDVL	9	Q91WZ8-3|DTBP1_MOUSE:Q91WZ8-2|DTBP1_MOUSE:Q91WZ8|DTBP1_MOUSE	1	1	1	1	1	5
SMFDQTQIQEF	11	P97457|MLRS_MOUSE	1					1
SMGLSLVEM	9	P31938|MP2K1_MOUSE	1	1	1		1	4
SMGQNGDLYF	10	P11627|L1CAM_MOUSE				1		1
SMGVNDIDI	9	Q3TIV5-2|ZC3HF_MOUSE:Q3TIV5|ZC3HF_MOUSE	1	1	1	1	1	5
SMGVNDIDISL	11	Q3TIV5|ZC3HF_MOUSE					1	1
SMIRLSESM	9	P97311|MCM6_MOUSE			1		1	2
SMLGNYDEM	9	Q9ESC8|AFF4_MOUSE	1					1
SMLINGYAL	9	P11983|TCPA_MOUSE	1	1	1		1	4
SMLQNPLGNVL	11	P70166|CPEB1_MOUSE	1	1	1	1		4
SMMQPGQLTTI	11	Q66JW3|TOX_MOUSE			1			1
SMNLNVRSMFL	11	Q8JZV9|BDH2_MOUSE		1				1
SMNSNIWQI	9	Q91V83|TTI1_MOUSE	1	1		1	1	4
SMNVNEIFM	9	Q9CQD1|RAB5A_MOUSE	1	1	1	1	1	5
SMPISEETL	9	P97432|NBR1_MOUSE	1					1
SMPRNTSYA	9	O54784|DAPK3_MOUSE		1	1			2
SMVLNSHDL	9	Q8BPU7|ELMO1_MOUSE			1			1
SMVLNSQSL	9	Q8BHL5-2|ELMO2_MOUSE:Q8BHL5|ELMO2_MOUSE:Q8BHL5-3|ELMO2_MOUSE	1		1			2
SMVQNRVFL	9	Q8C3J5|DOCK2_MOUSE	1		1			2
SMVRGMEAMTL	11	Q62130|PTN14_MOUSE					1	1
SNLINEYFL	9	Q8R3H7|HS2ST_MOUSE		1	1		1	3
SNLVNENTL	9	Q8K363|DDX18_MOUSE	1		1		1	3
SNLYNHPQLI	10	Q6NSQ7|LTV1_MOUSE	1					1
SNVVNQANL	9	Q8BTG7|NDRG4_MOUSE		1	1			2
SPGGAYVTR	9	P20152|VIME_MOUSE	1					1
SQALMEETI	9	Q2QI47|USH2A_MOUSE			1			1
SQALNTTVL	9	Q99NH8|TREM2_MOUSE:Q99NH8-2|TREM2_MOUSE	1					1
SQARNLNEV	9	Q6ZQK0|CNDD3_MOUSE			1			1
SQATNRETI	9	Q80U35|ARHGH_MOUSE		1		1	1	3
SQAVNKQQI	9	P51944|CCNF_MOUSE			1			1
SQEANAEVM	9	Q3UIJ9|MYZAP_MOUSE			1			1
SQFGEMGGKFM	11	Q62448|IF4G2_MOUSE	1					1
SQFPNAEKM	9	Q8C3J5|DOCK2_MOUSE			1			1
SQGMNVTNM	9	B2RWS6|EP300_MOUSE	1	1	1		1	4
SQGPQIPTI	9	Q8BR07-4|BICD1_MOUSE	1					1
SQGSNFLSAL	10	Q5Y5T2|ZDH18_MOUSE			1			1
SQHPNVIHL	9	Q8QZR7|PDK1L_MOUSE			1			1
SQHQSSYGPM	10	Q9CX86|ROA0_MOUSE	1				1	2
SQHVNLDQL	9	Q8CDJ3|BAKOR_MOUSE	1	1	1	1	1	5
SQIANTDTL	9	Q6DID3|SCAF8_MOUSE		1	1		1	3
SQIGNAMGYI	10	Q3UMB9|WASH7_MOUSE					1	1
SQIGNLEAL	9	Q8BVU0|LRCH3_MOUSE	1	1	1	1	1	5
SQIKNEINI	9	Q8C7X2|EMC1_MOUSE			1		1	2
SQISNGSHM	9	Q5F2E8|TAOK1_MOUSE		1	1		1	3
SQISNTEFL	9	Q3TCJ1|ABRX2_MOUSE	1		1	1	1	4
SQITSLVTL	9	Q9WUV0|ORC5_MOUSE	1	1	1	1	1	5
SQIVNPESI	9	Q8R3K3|PTCD2_MOUSE	1	1	1	1	1	5
SQKENLNFL	9	Q8CDM1|ATAD2_MOUSE		1	1	1	1	4
SQLANEKLTQL	11	P70335|ROCK1_MOUSE			1			1
SQLEKTFAM	9	P59438-2|HPS5_MOUSE:P59438|HPS5_MOUSE	1					1
SQLELKSLI	9	Q61532|MK06_MOUSE	1					1
SQLENKTII	9	A2AKX3-2|SETX_MOUSE:A2AKX3|SETX_MOUSE	1		1	1		3
SQLGNAYFYL	10	Q6IR34|GPSM1_MOUSE			1		1	2
SQLIDTHLL	9	Q3TLH4|PRC2C_MOUSE	1					1
SQLIHLIYI	9	Q7TMV3|FAKD5_MOUSE			1			1
SQLIILDTL	9	Q04690-3|NF1_MOUSE:Q04690|NF1_MOUSE:Q04690-4|NF1_MOUSE:Q04690-2|NF1_MOUSE	1	1	1	1	1	5
SQLKNADVEL	10	P17427|AP2A2_MOUSE	1		1			2
SQLLNLTQL	9	Q80TH2|ERBIN_MOUSE	1	1	1	1	1	5
SQLMMRTRI	9	Q9CQJ1|HIG2A_MOUSE			1			1
SQLPLLSTI	9	A6PWY4-2|WDR76_MOUSE:A6PWY4|WDR76_MOUSE	1	1	1	1	1	5
SQLQGYTVL	9	Q9JLI6|SCLY_MOUSE			1			1
SQLQNEFYL	9	Q02788|CO6A2_MOUSE	1			1		2
SQLQSLTLI	9	Q9QXW0|FBXL6_MOUSE	1		1	1	1	4
SQLRLLFTM	9	Q8K2Z4|CND1_MOUSE		1	1			2
SQLRNADVEL	10	P17426-2|AP2A1_MOUSE:P17426|AP2A1_MOUSE	1	1	1			3
SQLRNEVAI	9	Q62101|KPCD1_MOUSE			1			1
SQLSLLDYF	9	Q8BKC8|PI4KB_MOUSE	1	1	1	1		4
SQLTNVILHL	10	Q8BGV8|MID51_MOUSE		1	1	1	1	4
SQLVILDQM	9	Q52KR3|PRUN2_MOUSE					1	1
SQLVKADEM	9	Q91YW3|DNJC3_MOUSE	1	1	1	1	1	5
SQLVNLQEL	9	Q66JT1|LRC8E_MOUSE				1		1
SQMEHAMETM	10	P08207|S10AA_MOUSE					1	1
SQMTNLQEL	9	Q8BGR2|LRC8D_MOUSE				1		1
SQMTNLQELHL	11	Q8BGR2|LRC8D_MOUSE			1	1		2
SQNFNEEFL	9	Q8R1A4|DOCK7_MOUSE				1	1	2
SQNRNGEFV	9	Q4FK66|PR38A_MOUSE		1	1			2
SQPESKVFYL	10	P63101|1433Z_MOUSE	1					1
SQPGPRLPFI	10	Q921N8|GPS2_MOUSE	1					1
SQPLNRWLI	9	Q8CGT6|PIWL4_MOUSE			1			1
SQPRLVDII	9	Q9CZX0|ELP3_MOUSE			1			1
SQPRNHVAVL	10	A2ARJ3|TM236_MOUSE					1	1
SQPVNPHSL	9	Q3UHH1|ZSWM8_MOUSE	1	1	1	1	1	5
SQPVPPADIYL	11	Q9D074|MGRN1_MOUSE	1					1
SQQRNFQLL	9	P70388|RAD50_MOUSE			1			1
SQSMNFSLM	9	Q99KN9|EPN4_MOUSE					1	1
SQSWNLDTL	9	Q9D5J6|SHPK_MOUSE			1			1
SQTSNSQFI	9	Q5RJH6|SMG7_MOUSE			1			1
SQVENPTASHV	11	P13379|CD5_MOUSE			1			1
SQVINMKTEL	10	Q8BMD6|CN101_MOUSE			1			1
SQVINPTAI	9	Q61191|HCFC1_MOUSE	1	1	1	1	1	5
SQVINPTAITV	11	Q61191|HCFC1_MOUSE	1		1	1		3
SQVINSHSV	9	Q7TSA3|BTLA_MOUSE			1			1
SQVMNLHNL	9	P29812|TYRP2_MOUSE	1	1	1		1	4
SQVSDYDYF	9	Q8R1S4|MTSS1_MOUSE					1	1
SQVTLREPL	9	Q7TMB8-2|CYFP1_MOUSE:Q7TMB8|CYFP1_MOUSE	1		1			2
SQVVNVLTSVI	11	Q3TQQ9|CA112_MOUSE	1	1	1	1	1	5
SQVYNDAHI	9	Q8BSQ9|PB1_MOUSE	1	1	1	1	1	5
SQYFNRAPVL	10	Q80VY9|DHX33_MOUSE			1			1
SQYRFTVSDL	10	P51945|CCNG1_MOUSE	1					1
SRILNSTNI	9	Q99K43|PRC1_MOUSE			1			1
SRLINLTFL	9	Q62192|CD180_MOUSE			1			1
SRQESQAPER	10	Q8C804|SPICE_MOUSE	1					1
SSAKNFITKM	10	Q6P5E4|UGGG1_MOUSE			1		1	2
SSATFEKESVM	11	P51912|AAAT_MOUSE	1					1
SSATNRITV	9	Q9JM05|PIAS4_MOUSE	1		1			2
SSEAPPLVNED	11	Q91YQ5|RPN1_MOUSE	1					1
SSEINSAYL	9	Q3UPF5|ZCCHV_MOUSE			1			1
SSFENLHFENL	11	Q6NVF4|HELB_MOUSE			1			1
SSFMNPDKI	9	O35185|BHE40_MOUSE	1					1
SSFVDHDFL	9	Q99MY8|ASH1L_MOUSE					1	1
SSFVNTMTSL	10	P28660|NCKP1_MOUSE		1		1		2
SSGINGSFL	9	P00520|ABL1_MOUSE	1				1	2
SSGINVNAA	9	Q60865|CAPR1_MOUSE	1					1
SSGINVNAAPF	11	Q60865|CAPR1_MOUSE	1				1	2
SSGKNLFYL	9	P97467|AMD_MOUSE				1	1	2
SSGRNKTFL	9	Q9WV35|ABEC2_MOUSE			1			1
SSGVGAQHL	9	Q8BLX7|COGA1_MOUSE	1					1
SSHENRPLDLL	11	Q7TMY8|HUWE1_MOUSE			1			1
SSHSNSEEL	9	Q3UHC7|DAB2P_MOUSE		1	1		1	3
SSIANLKVSLL	11	Q9D0V8-2|CINP_MOUSE:Q9D0V8-3|CINP_MOUSE:Q9D0V8|CINP_MOUSE	1	1	1	1		4
SSIEHLTTL	9	Q7TMY8|HUWE1_MOUSE			1	1	1	3
SSIINFGALI	10	Q80W93|HYDIN_MOUSE	1					1
SSILLIDKV	9	Q8CC35|SYNPO_MOUSE	1					1
SSILNKYDDNV	11	O08915|AIP_MOUSE			1		1	2
SSIQLKTNFL	10	Q5PRF0|HTR5A_MOUSE	1	1		1	1	4
SSIQNFQKGTL	11	Q8BX57|PXK_MOUSE			1			1
SSIQNGKYTL	10	Q3UWM4|KDM7A_MOUSE	1	1	1	1	1	5
SSIQNPKVSL	10	Q80WC1|UBN2_MOUSE	1		1		1	3
SSIRNFLIYV	10	B1AXP6|TOM5_MOUSE	1	1	1	1	1	5
SSISHSVLSEM	11	Q99K28|ARFG2_MOUSE	1					1
SSISNSLENAL	11	Q8VIG0|ZCH14_MOUSE			1			1
SSITNHINKL	10	Q62217|SEM5A_MOUSE	1		1		1	3
SSIVAQTAGI	10	Q5SWU9|ACACA_MOUSE:Q5SWU9-2|ACACA_MOUSE	1					1
SSIVNKEGL	9	P49813|TMOD1_MOUSE	1	1	1	1	1	5
SSIVNSIQV	9	Q99PL5|RRBP1_MOUSE	1	1	1	1	1	5
SSIVNSIQVL	10	Q99PL5|RRBP1_MOUSE	1	1	1	1	1	5
SSKLNYDTV	9	P97868|RBBP6_MOUSE					1	1
SSLANILEL	9	Q8K0Z7|TACO1_MOUSE	1	1	1	1	1	5
SSLEMTTTF	9	Q91YJ3|THYN1_MOUSE	1					1
SSLENAFQI	9	Q3TUL7|DCA17_MOUSE	1		1			2
SSLENATSL	9	Q9JJF9|SPP2A_MOUSE	1					1
SSLFNTGFL	9	A2RSY6|TRM1L_MOUSE		1	1		1	3
SSLHNEQVL	9	Q8CHX6|MBTP2_MOUSE			1		1	2
SSLHNSLLL	9	Q60575|KIF1B_MOUSE			1			1
SSLHNVYLI	9	Q60862|ORC2_MOUSE	1		1			2
SSLINGSFL	9	Q4JIM5|ABL2_MOUSE	1	1	1	1	1	5
SSLINHKSV	9	Q8C827|ZFP62_MOUSE		1	1		1	3
SSLKNFQSCI	10	Q91VT1-2|NSE2_MOUSE:Q91VT1|NSE2_MOUSE	1					1
SSLKNGVVL	9	Q8K4I3|ARHG6_MOUSE	1		1			2
SSLKNHKGIHM	11	Q8C827|ZFP62_MOUSE			1			1
SSLKNIEKYL	10	Q8BRB7|KAT6B_MOUSE			1			1
SSLLDSAHL	9	O54774|AP3D1_MOUSE	1					1
SSLLNIQHF	9	A2RSJ4|UH1BL_MOUSE	1	1	1	1	1	5
SSLLNIQHFL	10	A2RSJ4|UH1BL_MOUSE			1			1
SSLLNKITNSL	11	Q6P6M7|SPCS_MOUSE			1			1
SSLLNLTFI	9	Q9Z1P4|LGR5_MOUSE	1	1				2
SSLLNNYVL	9	Q3V3Z3|GP114_MOUSE			1			1
SSLLNSEFC	9	Q9JJ28|FLII_MOUSE	1					1
SSLLNSEFCFI	11	Q9JJ28|FLII_MOUSE	1					1
SSLLNSHLQWL	11	P48381|RFX3_MOUSE		1				1
SSLLNYTQDM	10	O88509|DNM3B_MOUSE			1			1
SSLMKATVL	9	Q3UFY7-3|5NT3B_MOUSE:Q3UFY7-2|5NT3B_MOUSE:Q3UFY7|5NT3B_MOUSE	1					1
SSLPNLAISTI	11	E9Q555|RN213_MOUSE	1	1	1	1	1	5
SSLQLITEC	9	P28658|ATX10_MOUSE	1					1
SSLQLVTQYL	10	Q61526|ERBB3_MOUSE				1	1	2
SSLQNHNHQL	10	Q5DTM8|BRE1A_MOUSE			1			1
SSLQNLTSL	9	Q6R5N8|TLR13_MOUSE	1					1
SSLQNQALQTL	11	Q9QYE6|GOGA5_MOUSE			1			1
SSLQNYAKI	9	P41251|NRAM1_MOUSE	1					1
SSLSNAKDV	9	Q6P4T2|U520_MOUSE	1					1
SSLSNEHVL	9	Q8BTI7|ANR52_MOUSE	1	1	1	1	1	5
SSLSNPIANTM	11	Q8VE08|FBX33_MOUSE	1	1	1	1	1	5
SSLSTLGSTL	10	Q9DBR7|MYPT1_MOUSE					1	1
SSLTSIDWL	9	Q9ES18|FOXJ2_MOUSE		1				1
SSLVLKELL	9	Q52KR3|PRUN2_MOUSE					1	1
SSLVNCNNL	9	Q69ZB0|LRCC1_MOUSE	1					1
SSLVNGSTF	9	Q8BHK1|NIPA1_MOUSE	1	1		1	1	4
SSLVNGSTFVL	11	Q8BHK1|NIPA1_MOUSE				1		1
SSLVNKEDV	9	Q6GQT9|NOMO1_MOUSE	1	1	1	1	1	5
SSLVNKEDVL	10	Q6GQT9|NOMO1_MOUSE	1	1	1	1	1	5
SSLVNLDSL	9	Q91W69|EPN3_MOUSE			1			1
SSLVNSQTL	9	Q99K90|TAB2_MOUSE	1	1	1	1	1	5
SSMKNFKAFF	10	Q91W96|APC4_MOUSE		1	1			2
SSMRGMDTV	9	A2RTL5|RSRC2_MOUSE					1	1
SSMRNSSTKI	10	Q0VGY8|TANC1_MOUSE			1			1
SSNINSATL	9	Q8CI08|SLAI2_MOUSE			1			1
SSNLNMPRTFL	11	P52734|FGD1_MOUSE			1			1
SSPANISSL	9	P51125-5|ICAL_MOUSE:P51125-4|ICAL_MOUSE:P51125-7|ICAL_MOUSE:P51125-3|ICAL_MOUSE:P51125-2|ICAL_MOUSE:P51125-6|ICAL_MOUSE:P51125|ICAL_MOUSE	1		1		1	3
SSPASTPLSPM	11	Q91YK2|RRP1B_MOUSE	1					1
SSPEGVETM	9	Q6PR54|RIF1_MOUSE					1	1
SSPEMNIPSL	10	Q9JLB0|MPP6_MOUSE			1			1
SSPENKNWL	9	Q3TLR7|DTL_MOUSE:Q3TLR7-2|DTL_MOUSE	1	1	1	1	1	5
SSPENKNWLL	10	Q3TLR7|DTL_MOUSE	1		1	1	1	4
SSPENLKGFI	10	Q3URQ0|TEX10_MOUSE	1		1			2
SSPGPLPEEI	10	Q3UND0-2|SKAP2_MOUSE:Q3UND0|SKAP2_MOUSE	1					1
SSPINISGQVI	11	Q80WE4-4|KI20B_MOUSE:Q80WE4-2|KI20B_MOUSE:Q80WE4-3|KI20B_MOUSE:Q80WE4|KI20B_MOUSE	1	1	1	1	1	5
SSPKNVQGL	9	Q62230|SN_MOUSE	1					1
SSPKPNNSYM	10	Q8K3I9|GLCI1_MOUSE			1			1
SSPKSTLTL	9	Q5SSZ5|TENS3_MOUSE					1	1
SSPLGKDLL	9	Q921I1|TRFE_MOUSE	1					1
SSPLNDDLL	9	P35761-2|TTK_MOUSE:P35761|TTK_MOUSE	1	1	1	1	1	5
SSPLNHIYL	9	Q9CPW9|MAP12_MOUSE	1	1	1	1	1	5
SSPLNLAHV	9	Q9JJC9|HERP2_MOUSE		1	1	1	1	4
SSPLNQPATFL	11	Q7TNC6|KI26B_MOUSE	1		1			2
SSPLNSRAV	9	Q62210|BIRC2_MOUSE			1		1	2
SSPLNSTQT	9	Q8CJ27|ASPM_MOUSE			1			1
SSPMGSSEGLL	11	Q9CW46|RAVR1_MOUSE	1					1
SSPMNEFETL	10	Q9QXL2|KI21A_MOUSE				1	1	2
SSPQDFTSI	9	Q8K1Y2|KPCD3_MOUSE					1	1
SSPQNQEQI	9	Q07243|MTF1_MOUSE	1	1	1		1	4
SSPRNHLAM	9	Q8CGE9|RGS12_MOUSE			1			1
SSPRNSDWF	9	Q9QY01|ULK2_MOUSE	1		1			2
SSPSNIHNI	9	Q3UQ44|IQGA2_MOUSE	1		1		1	3
SSPSNKFFF	9	E9Q5F9|SETD2_MOUSE	1					1
SSPSNLQII	9	B1AY13|UBP24_MOUSE			1	1	1	3
SSPSQAMQEYI	11	Q9D061|ACBD6_MOUSE					1	1
SSPSSRETL	9	Q6ZPS2|CRNS1_MOUSE		1				1
SSPTDKHTL	9	Q9R0K7|AT2B2_MOUSE			1		1	2
SSPTGGPTL	9	O35206|COFA1_MOUSE	1					1
SSPTHTATSI	10	O70472|TM131_MOUSE			1			1
SSPTNSAITQL	11	Q9R0G7|ZEB2_MOUSE	1	1			1	3
SSPTSTEYI	9	P58929|GMEB2_MOUSE	1	1	1	1	1	5
SSPVNPVVF	9	Q9D868|PPIH_MOUSE	1	1	1	1	1	5
SSPVNPVVFF	10	Q9D868|PPIH_MOUSE		1	1	1	1	4
SSPVNVKKL	9	Q8VEK3|HNRPU_MOUSE	1	1	1		1	4
SSPVSNVAI	9	Q5XJV7|SETD5_MOUSE			1			1
SSSLNAEAI	9	Q62261|SPTB2_MOUSE:Q62261-2|SPTB2_MOUSE	1					1
SSSLNQEKI	9	Q5DTT3|F208B_MOUSE	1		1		1	3
SSSPGGAYVTR	11	P20152|VIME_MOUSE	1					1
SSSTNVDLL	9	Q9D2C2-2|SAAL1_MOUSE:Q9D2C2|SAAL1_MOUSE	1	1	1		1	4
SSTTNIDDL	9	A2AGT5|CKAP5_MOUSE	1					1
SSTTNPKLSTL	11	Q9EST3|4ET_MOUSE	1					1
SSTVNPITI	9	Q0VGT2|GLI2_MOUSE			1			1
SSVASTDVL	9	P17426|AP2A1_MOUSE					1	1
SSVENETKL	9	Q63918|SDPR_MOUSE					1	1
SSVENIQRV	9	Q02257|PLAK_MOUSE				1	1	2
SSVFNVEMV	9	Q811I0|ATPF1_MOUSE	1		1		1	3
SSVINAVTHA	10	Q80XN0|BDH_MOUSE			1			1
SSVKNVPENL	10	Q8R010|AIMP2_MOUSE			1		1	2
SSVLNKLVV	9	Q91ZJ5|UGPA_MOUSE	1					1
SSVLNLTEL	9	Q8BW56|GTDC1_MOUSE	1	1	1	1	1	5
SSVLNVVSM	9	P55200|KMT2A_MOUSE	1	1	1	1	1	5
SSVPGVRLL	9	P20152|VIME_MOUSE	1					1
SSVQNGIML	9	Q80U04|PJA2_MOUSE	1	1	1		1	4
SSVQNKEYL	9	B2RRE4|Z518B_MOUSE	1	1				2
SSVQNYFHL	9	Q6PD31|TRAK1_MOUSE			1		1	2
SSVRDRDLL	9	Q4FZC9|SYNE3_MOUSE			1		1	2
SSVRNSKSL	9	O89050|MKLN1_MOUSE		1	1			2
SSVSNKTTL	9	Q148V7|K1468_MOUSE	1	1	1			3
SSVSNPRNWL	10	Q9ER63|TNR23_MOUSE					1	1
SSVSNTNYATL	11	Q61321|SIX4_MOUSE					1	1
SSVTDEVFL	9	Q3TIR1|CE044_MOUSE					1	1
SSVTNLFSNPF	11	P97819|PLPL9_MOUSE		1				1
SSVVGVWYL	9	Q9D8V0|HM13_MOUSE:Q9D8V0-4|HM13_MOUSE	1		1		1	3
SSVVNFQII	9	Q8BFR1|ZCCHL_MOUSE		1	1	1	1	4
SSWRNGMAFL	10	Q6ZWQ0|SYNE2_MOUSE		1				1
SSYHSNPAYM	10	Q8BZ21|KAT6A_MOUSE					1	1
SSYINASFI	9	P29352|PTN22_MOUSE			1			1
STDAWPQELAP	11	P29812|TYRP2_MOUSE	1					1
STFSHHSMVSM	11	Q80X50-3|UBP2L_MOUSE:Q80X50-4|UBP2L_MOUSE:Q80X50|UBP2L_MOUSE:Q80X50-5|UBP2L_MOUSE	1					1
STHVNHNIYI	10	A2AH22|AMRA1_MOUSE			1			1
STHYNLHNL	9	P70699|LYAG_MOUSE			1		1	2
STIINEDASFF	11	Q7TN98|CPEB4_MOUSE	1					1
STIKNANFV	9	Q9JI39|ABCBA_MOUSE	1	1	1		1	4
STIMNLLSL	9	Q6PAR5|GAPD1_MOUSE	1	1	1			3
STIRLLTSL	9	P80318|TCPG_MOUSE		1	1	1	1	4
STIRNADVI	9	P21440|MDR3_MOUSE	1			1		2
STIRNAQSI	9	Q09014|NCF1_MOUSE	1					1
STISNDVFI	9	Q80U12|SGSM2_MOUSE	1	1	1	1	1	5
STITNIILV	9	Q8VC49|IF27B_MOUSE	1				1	2
STITNPSAI	9	B2RQC2|UBP42_MOUSE	1					1
STLGNKETL	9	Q6ZWR6|SYNE1_MOUSE					1	1
STLINSLFL	9	O55131|SEPT7_MOUSE:P42208|SEPT2_MOUSE:P42209|SEPT1_MOUSE	1	1	1			3
STLLNAQTL	9	Q6ZWQ0|SYNE2_MOUSE	1	1	1			3
STLLNYDYI	9	O70423|AOC3_MOUSE	1					1
STLRLLTTI	9	Q4VA53|PDS5B_MOUSE	1	1	1			3
STLRNIRTV	9	Q9DBZ1|IKIP_MOUSE	1		1		1	3
STLVHKFFL	9	Q6PCL9|PAPOG_MOUSE:Q61183|PAPOA_MOUSE	1					1
STLVNSLFL	9	P28661-6|SEPT4_MOUSE:P28661-5|SEPT4_MOUSE:P28661-4|SEPT4_MOUSE:P28661-3|SEPT4_MOUSE:P28661-2|SEPT4_MOUSE:P28661|SEPT4_MOUSE	1					1
STMQLADHI	9	O08788-2|DCTN1_MOUSE:O08788|DCTN1_MOUSE	1				1	2
STMVNADHF	9	P58196|PLS4_MOUSE	1	1			1	3
STPFNKEEL	9	P40201|CHD1_MOUSE			1			1
STPQNTGYL	9	Q91ZU6|DYST_MOUSE					1	1
STPVNVTSL	9	E9Q5G3|KIF23_MOUSE	1					1
STRSVSSSSY	10	P20152|VIME_MOUSE	1					1
STVENFSQL	9	Q571H0|NPA1P_MOUSE		1	1	1	1	4
STVFNPSVL	9	Q8C181-2|MBNL2_MOUSE:Q8C181|MBNL2_MOUSE:Q8C181-4|MBNL2_MOUSE	1	1	1	1	1	5
STVKNEFSL	9	O08746|MATN2_MOUSE				1	1	2
STVLTSKYR	9	P01942|HBA_MOUSE	1					1
STVNNTVTV	9	Q8BZN6|DOC10_MOUSE			1		1	2
STVQNAEAYVL	11	Q8R5K2|UBP33_MOUSE	1		1	1	1	4
STVRNADVI	9	P21447|MDR1A_MOUSE:P06795|MDR1B_MOUSE	1	1	1	1	1	5
STVSNMATV	9	P01901|HA1B_MOUSE		1	1			2
STVSNMVII	9	P06339|HA15_MOUSE		1	1			2
STVVNADQI	9	Q9DC29|ABCB6_MOUSE	1	1	1	1		4
STVVNEAKL	9	Q2UY11-2|COSA1_MOUSE:Q2UY11|COSA1_MOUSE	1					1
STYINASYI	9	P06800|PTPRC_MOUSE			1			1
SVATNIDEI	9	Q9CU62|SMC1A_MOUSE			1			1
SVFPNQDEM	9	P83887|TBG1_MOUSE			1			1
SVFSNLTTI	9	Q61526|ERBB3_MOUSE				1		1
SVFSNLVTI	9	Q61527|ERBB4_MOUSE			1			1
SVIQNNEHV	9	Q8C0V9|FRMD6_MOUSE					1	1
SVIQNNEHVYM	11	Q8C0V9|FRMD6_MOUSE					1	1
SVIRLIFEI	9	Q8BZS9|DHX32_MOUSE		1	1	1		3
SVISNIVLM	9	O54824|IL16_MOUSE				1		1
SVLANYFVFM	10	Q01237|HMDH_MOUSE		1	1			2
SVLELQEYL	9	E9Q8I9|FRY_MOUSE			1			1
SVLFNLTTM	9	Q8K2L8|TPC12_MOUSE	1	1	1	1	1	5
SVLRLVDAL	9	Q9Z2V5|HDAC6_MOUSE	1	1	1			3
SVLRNPFETI	10	Q80YR7|CLSPN_MOUSE		1	1			2
SVLRNQESV	9	Q6DFV1|CNDG2_MOUSE			1			1
SVLVNDFFL	9	P60229|EIF3E_MOUSE		1	1	1		3
SVSTVLTSKYR	11	P01942|HBA_MOUSE	1					1
SVVLNTSTL	9	O88196|TTC3_MOUSE			1			1
SVVQNQQQV	9	Q6KCD5|NIPBL_MOUSE	1					1
SVVVNGIDL	9	Q8BH44|COR2B_MOUSE			1			1
SYVTTSTRT	9	P20152|VIME_MOUSE	1					1
TAAENAEKI	9	Q91WK0|LRRF2_MOUSE					1	1
TAAFNKDAL	9	Q8BTI9|PK3CB_MOUSE			1			1
TAHYNRERI	9	Q99PV0|PRP8_MOUSE			1		1	2
TAIENATVAF	10	O88738|BIRC6_MOUSE	1					1
TAIENSWIHL	10	Q9CQG2|MET16_MOUSE	1	1	1	1	1	5
TAIHNFPAV	9	Q3TLH4|PRC2C_MOUSE					1	1
TAILNDYEL	9	Q6ZQ12|NINL_MOUSE	1	1		1	1	4
TAIMNSDCL	9	Q06985|SIA1B_MOUSE:P61092|SIA1A_MOUSE	1					1
TAISNLLPFM	10	Q7TPS5|K0528_MOUSE			1			1
TAISNYMNQL	10	Q8K3H0|DP13A_MOUSE			1		1	2
TALEHQEYI	9	O35658|C1QBP_MOUSE	1	1	1	1	1	5
TALENLIVL	9	Q69ZR2|HECD1_MOUSE	1	1	1	1	1	5
TALENLSTL	9	P19096|FAS_MOUSE	1	1	1	1	1	5
TALKNSTMV	9	Q80XE1|RIC8B_MOUSE	1	1	1			3
TALLNAPHI	9	Q9JLB2|MPP5_MOUSE	1		1	1		3
TALNNPYYYL	10	Q9JK30|ORC3_MOUSE		1	1		1	3
TALQNYLTEAL	11	P34056-2|AP2A_MOUSE:P34056-3|AP2A_MOUSE:P34056|AP2A_MOUSE:P34056-4|AP2A_MOUSE	1	1		1	1	4
TALRLITAL	9	Q80YQ2|MED23_MOUSE		1	1	1		3
TALRNLPEYTL	11	Q6P4S8|INT1_MOUSE			1			1
TALTNSVATV	10	Q3UHF3|MIER3_MOUSE			1			1
TALWNPVSL	9	Q3U3C9|GSE1_MOUSE			1			1
TAPDNLGYA	9	P07147|TYRP1_MOUSE	1					1
TAPLNEDVF	9	O35973|PER1_MOUSE			1			1
TAPLNTQIPTL	11	Q9D219|BCL9_MOUSE			1	1	1	3
TAPSNSVSQSL	11	Q3UWW6|GA2L3_MOUSE	1					1
TAPTHVPLQYI	11	Q9JJL8|SYSM_MOUSE			1			1
TAPTNATYP	9	Q99NH0|ANR17_MOUSE	1	1	1			3
TAPVNIAVI	9	Q99JF5|MVD1_MOUSE	1	1	1	1	1	5
TAPWNTTRAFI	11	Q80UV9|TAF1_MOUSE		1				1
TAPYNYSYI	9	Q91V41|RAB14_MOUSE	1	1	1	1	1	5
TAVANNQAL	9	Q9R1W5|CALRL_MOUSE	1		1		1	3
TAVINKDVF	9	O35615|FOG1_MOUSE			1			1
TAVISYDYL	9	Q9D0L4|ADCK1_MOUSE	1		1			2
TAVLNLHEHL	10	Q6ZWQ0|SYNE2_MOUSE	1	1	1		1	4
TAVRNGFHSL	10	A2AN08-3|UBR4_MOUSE:A2AN08|UBR4_MOUSE:A2AN08-5|UBR4_MOUSE	1				1	2
TAVTNSARL	9	P59016|VP33B_MOUSE	1		1			2
TAVVNRVFDKL	11	P28076|PSB9_MOUSE	1	1	1		1	4
TAVVNVTYM	9	Q5SF07|IF2B2_MOUSE	1			1	1	3
TEVLKTNGLLV	11	P19253|RL13A_MOUSE	1					1
TEWLDGKHVVF	11	P17742|PPIA_MOUSE	1					1
TGAKNLYII	9	P62830|RL23_MOUSE	1					1
TGFDKTKLESM	11	Q811J3|IREB2_MOUSE	1					1
TGIANENHNTL	11	Q8BR07|BICD1_MOUSE	1				1	2
TGIKNGVHF	9	Q9WUQ2|PREB_MOUSE	1					1
TGIKNGVHFL	10	Q9WUQ2|PREB_MOUSE	1	1	1	1	1	5
TGILNPEGYTL	11	O88554|PARP2_MOUSE	1	1	1	1	1	5
TGIRNLEWL	9	Q8BMD6|TM260_MOUSE	1	1	1	1	1	5
TGLQNQRVL	9	Q9QUR6|PPCE_MOUSE			1			1
TGPENSNTDTL	11	A2AWL7-3|MGAP_MOUSE	1	1	1			3
TGPFNLQLI	9	B2RQC6-2|PYR1_MOUSE:B2RQC6|PYR1_MOUSE	1					1
[truncated: 513 more rows]
